# Supplementary material for: 1,2,3-Triazole Hybrids Containing Isatins and Phenolic Moieties: Regioselective Synthesis and Molecular Docking Studies
Source: MDPI journal article supplement (doi:10.3390/molecules29071556), 2024-03-30

## SUPPLEMENTARY MATERIALS

### 1,2,3-Triazole hybrids containing isatins and phenolic moieties: regioselective synthesis and molecular docking studies

Loredana Maiuolo<sup>1</sup>, Matteo Antonio Tallarida<sup>2</sup>, Angelo Meduri,<sup>3</sup> Giulia Fiorani<sup>4</sup>, Antonio Jiritano<sup>1</sup>, Antonio De Nino<sup>1</sup>, Vincenzo Algieri<sup>5,\*</sup> Paola Costanzo<sup>1,\*</sup>

<sup>1</sup> Department of Chemistry and Chemical Technologies, University of Calabria, 87036 Rende, Italy; maiuolo@unical.it; antonio.jiritano@unical.it; denino@unical.it

<sup>2</sup> RINA Consulting - Centro Sviluppo Materiali SpA, Via di Castel Romano 100, Rome, 00128, Italy; matteo.tallarida@rina.org

<sup>3</sup> RINA Consulting – Centro Sviluppo Materiali SpA, Zona Industriale San Pietro Lametino, comparto 1, 88046 Lamezia Terme, CZ, Italy; angelo.meduri@rina.org

<sup>4</sup> Department Molecular Sciences and Nanosystems, University Ca' Foscari Venezia, 30172 Mestre, VE, Italy; giulia.fiorani@unive.it

<sup>5</sup> IRCCS NEUROMED – Istituto Neurologico Mediterraneo, Via Atinense 18, 86077 – Pozzilli, IS, IT.

\* Correspondence: vincenzo.algieri@unical.it (VA); paola.costanzo@unical.it (PC)

|                                                                                              |     |
|----------------------------------------------------------------------------------------------|-----|
| General procedure for synthesis of different 1-(2-bromoethyl)isatins 6-9.....                | S1  |
| General procedure for synthesis of variously 1-(2-azidoethyl)isatins 10-13.....              | S3  |
| General procedure for synthesis of propargyl esters 20-22.....                               | S5  |
| Characterization spectra of 1-(2-bromoethyl) isatins 6-9.....                                | S6  |
| Characterization spectra of 1-(2-azidoethyl) isatins 10-13.....                              | S21 |
| Characterization spectra of propargyl esters 20-22.....                                      | S37 |
| <sup>1</sup> H NMR (300 MHz) spectra of crude of the model reaction for synthesis of 23..... | S49 |
| Characterization spectra of hybrid molecules 23-34.....                                      | S50 |

## General procedure for synthesis of 1-(2-bromoethyl)isatins 6-9:

In 250 ml three-necked round-bottomed flask, equipped with bubble condenser and magnetic stir bar, opportune isatin **1-4** ( $3.40 \times 10^{-2}$  mol) was dissolved in *dry* DMF (30 ml) and anhydrous  $K_2CO_3$  (7.05 g,  $5.1 \times 10^{-2}$  mol) was added. The resulting suspension was stirred at room temperature for 20 min before the addition of freshly distilled 1,2-dibromoethane **5** (29.5 ml, 63.85 g,  $3.40 \times 10^{-1}$  mol). The reaction mixture was heated to 40 °C with constant stirring for about 5 h. After the completion of reaction, water (20 ml) was added and crude was extracted with ethyl acetate (3 x 30 ml). The combined organic layers were washed with brine solution, dried over anhydrous  $Na_2SO_4$ , filtered and concentrated in vacuo. Purification of reaction crude by flash chromatography by using hexane:ethyl acetate (8:2 v/v) furnished the desired 1-(2-bromoethyl)isatin **6-9** in good yields.

### 1-(2-Bromoethyl)isatin (6)

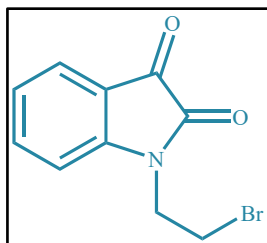

$^1H$  NMR (DMSO- $d_6$ , 300 MHz):  $\delta$  (ppm) 3.72 (t,  $J=6.73$  Hz, 2H,  $CH_2$ ), 4.12 (t,  $J=6.73$  Hz, 2H,  $CH_2$ ), 7.15 (t,  $J=7.55$  Hz, 1H, Ar), 7.30 (d,  $J=7.98$  Hz, 1H, Ar), 7.57 (d,  $J=7.45$  Hz, 1H, Ar), 7.68 (t,  $J=7.51$  Hz, 1H, Ar).  $^{13}C$  NMR (DMSO- $d_6$ , 125 MHz):  $\delta$  (ppm) 30.08, 42.12, 112.02, 118.32, 124.36, 125.53, 139.24, 151.13, 159.06, 183.91. ESI(+)-MS:  $m/z$   $[M+H]^+$  calcd for  $[C_{10}H_9BrNO_2]^+$ , 253.9811, found 253.9798.

### 1-(2-Bromoethyl)-5-methyisatin (7)

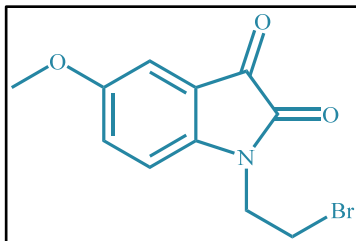

$^1H$  NMR (DMSO- $d_6$ , 300 MHz):  $\delta$  (ppm) 3.70 (t,  $J=6.48$  Hz, 2H,  $CH_2$ ), 3.77 (s, 3H,  $CH_3$ ), 4.09 (t,  $J=6.48$  Hz, 2H,  $CH_2$ ), 7.12-7.17 (m, 1H, Ar), 7.22-7.27 (m, 2H, Ar).  $^{13}C$  NMR (DMSO- $d_6$ , 125 MHz):  $\delta$  (ppm) 30.24, 42.19, 56.92, 110.24, 113.20, 118.88, 125.12, 145.02, 156.83, 159.19, 184.24. ESI(+)-MS:  $m/z$   $[M+H]^+$  calcd for  $[C_{11}H_{11}BrNO_3]^+$ , 283.9917, found 284.0002.

### 1-(2-Bromoethyl)-5-nitroisatin (8)

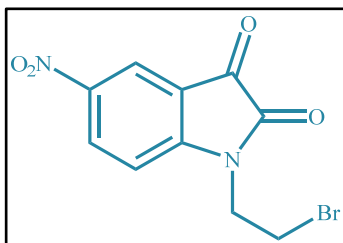

$^1H$  NMR (DMSO- $d_6$ , 300 MHz):  $\delta$  (ppm) 3.76 (t,  $J=6.12$  Hz, 2H,  $CH_2$ ), 4.16 (t,  $J=6.12$  Hz, 2H,  $CH_2$ ), 7.46 (d,  $J=8.80$  Hz, 1H, Ar), 8.24 (d,  $J=2.35$  Hz, 1H, Ar), 8.37 (dd,  $J=8.78$  Hz, 2.47 Hz, 1H, Ar).  $^{13}C$  NMR (DMSO- $d_6$ , 125 MHz):  $\delta$  (ppm) 30.29, 42.26, 101.26, 111.62, 121.23, 126.14, 129.40, 144.33, 149.90, 173.99. ESI(+)-MS:  $m/z$   $[M+H]^+$  calcd for  $[C_{10}H_8BrN_2O_4]^+$ , 298.9662, found 298.9657.

### 1-(2-Bromoethyl)-5-chloroisatin (9)

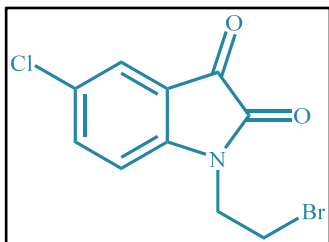

$^1\text{H}$  NMR (DMSO- $d_6$ , 300 MHz):  $\delta$  (ppm) 3.69 (t,  $J=6.58$  Hz, 2H,  $\text{CH}_2$ ), 4.11 (t,  $J=6.58$  Hz, 2H,  $\text{CH}_2$ ), 7.36 (d,  $J=8.51$  Hz, 1H, Ar), 7.64 (d,  $J=2.21$  Hz, 1H, Ar), 7.73 (dd,  $J=8.54$  Hz, 2.25 Hz, 1H, Ar).  $^{13}\text{C}$  NMR (DMSO- $d_6$ , 125 MHz):  $\delta$  (ppm) 29.96, 42.30, 113.86, 119.78, 125.05, 128.63, 138.09, 149.74, 158.89, 182.87.

## General procedure for synthesis of 1-(2-azidoethyl)isatins 10-13:

In 250 ml three-necked round-bottomed flask, equipped with bubble condenser and magnetic stir bar, opportune 1-(2-bromoethyl)isatin **6-9** ( $2.58 \times 10^{-2}$  mol) in *dry* DMF (30 ml) was dissolved and NaN<sub>3</sub> ( $3.87 \times 10^{-2}$  mol) was added. The reaction mixture was heated at 60 °C for 3 h under stirring and was monitored by TLC. Upon completion, water was added (50 ml) and the reaction mixture was extracted with ethyl acetate (3 x 30 ml). The combined organic layers were washed with brine, dried over anhydrous Na<sub>2</sub>SO<sub>4</sub>, filtered and concentrated under reduced pressure. The crude was purified by flash chromatography using hexane:ethyl acetate (8:2 v/v) to furnish the desired 1-(2-azidoethyl)isatin **10-13** in good yields.

### 1-(2-azidoethyl)isatin (10)

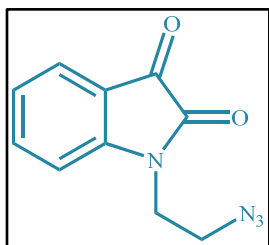

<sup>1</sup>H-NMR (DMSO-*d*<sub>6</sub>, 300 MHz):  $\delta$  (ppm) 3.63 (t, *J*=5.68 Hz, 2H, CH<sub>2</sub>), 3.89 (t, *J*=5.68 Hz, 2H, CH<sub>2</sub>), 7.15 (t, *J*=7.54 Hz, 1H, Ar), 7.28 (d, *J*=7.95 Hz, 1H, Ar), 7.56 (d, *J*=7.54 Hz, 1H, Ar), 7.68 (t, *J*=7.74 Hz, 1H, Ar). <sup>13</sup>C-NMR (DMSO-*d*<sub>6</sub>, 125 MHz):  $\delta$  (ppm) 39.93, 48.93, 111.91, 118.36, 124.30, 125.48, 139.22, 151.37, 159.25, 183.98. ESI(+)-MS: *m/z* [M+H]<sup>+</sup> calcd for [C<sub>10</sub>H<sub>9</sub>N<sub>4</sub>O<sub>2</sub>]<sup>+</sup>, 217.0720, found 217.0720.

### 1-(2-azidoethyl)-5-methylisatin (11)

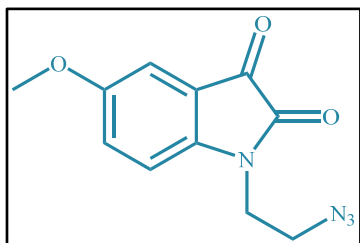

<sup>1</sup>H NMR (DMSO-*d*<sub>6</sub>, 300 MHz):  $\delta$  (ppm) 3.61 (t, *J*=5.83 Hz, 2H, CH<sub>2</sub>), 3.77 (s, 3H, CH<sub>3</sub>), 3.86 (t, *J*=5.83 Hz, 2H, CH<sub>2</sub>), 7.12-7.16 (m, 1H, Ar), 7.18-7.31 (m, 2H, Ar). <sup>13</sup>C NMR (DMSO-*d*<sub>6</sub>, 125 MHz):  $\delta$  (ppm) 40.00, 49.00, 56.89, 110.18, 113.09, 118.89, 125.11, 145.22, 156.80, 159.35, 184.29. ESI(+)-MS: *m/z* [M+H]<sup>+</sup> calcd for [C<sub>11</sub>H<sub>11</sub>N<sub>4</sub>O<sub>3</sub>]<sup>+</sup>, 247.0826, found 247.0824.

### 1-(2-azidoethyl)-5-nitroisatin (12)

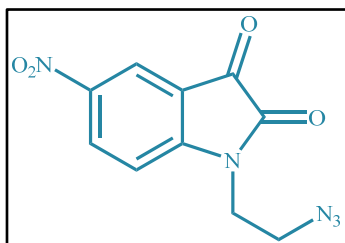

<sup>1</sup>H NMR (DMSO-*d*<sub>6</sub>, 300 MHz):  $\delta$  (ppm) 3.63 (t, *J*=5.55 Hz, 2H, CH<sub>2</sub>), 3.93 (t, *J*=5.55 Hz, 2H, CH<sub>2</sub>), 7.45 (d, *J*= 8.81 Hz, 1H, Ar), 8.24 (d, *J*= 2.42 Hz, 1H, Ar), 8.39 (dd, *J*=8.76 Hz, 2.36 Hz, 1H, Ar). <sup>13</sup>C NMR (DMSO-*d*<sub>6</sub>, 125 MHz):  $\delta$  (ppm) 48.92, 67.15, 101.26, 111.46, 121.21, 126.17, 129.48, 144.31, 150.05, 174.08. ESI(+)-MS: *m/z* [M+H]<sup>+</sup> calcd for [C<sub>10</sub>H<sub>8</sub>N<sub>5</sub>O<sub>4</sub>]<sup>+</sup>, 262.0571, found 262.0620.



### 1-(2-Azidoethyl)-5-chloroisatin (13)

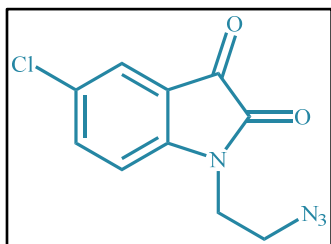

$^1\text{H}$  NMR (DMSO- $d_6$ , 300 MHz):  $\delta$  (ppm) 3.61 (t,  $J=5.74$  Hz, 2H,  $\text{CH}_2$ ), 3.88 (t,  $J=5.74$  Hz, 2H,  $\text{CH}_2$ ), 7.33 (d,  $J=8.48$  Hz, 1H, Ar), 7.62 (d,  $J=2.24$  Hz, 1H, Ar), 7.73 (dd,  $J=8.50$  Hz, 2.26 Hz, 1H, Ar).  $^{13}\text{C}$  NMR (DMSO- $d_6$ , 125 MHz):  $\delta$  (ppm) 40.10, 49.07, 113.77, 119.81, 125.00, 128.57, 138.10, 150.02, 159.07, 182.97. ESI(+)-MS:  $m/z$   $[\text{M}+\text{H}]^+$  calcd for  $[\text{C}_{10}\text{H}_8\text{ClN}_4\text{O}_2]^+$ , 251.0330, found 251.0378.

## General procedure for synthesis of propargyl esters 20-22:

In 250 ml three-necked round-bottomed flask, equipped with bubble condenser and magnetic stir bar, opportune carboxylic acid **14-16** ( $5.88 \times 10^{-2}$  mol) was placed and freshly distilled thionyl chloride was added (30 ml,  $4.11 \times 10^{-1}$  mol). The reaction was conducted at reflux for 6h and subsequently the thionyl chloride in excess was removed under vacuum. The oily residue corresponding to acyl chloride **17-19**, was cooled by using an ice bath and then, propargyl alcohol (41 ml,  $7.06 \times 10^{-1}$  mol) was added dropwise for 30 min. The mixture was stirred at room temperature for 2h and then was concentrated in vacuo. Purification of crude product by flash chromatography using  $\text{CHCl}_3$ :MeOH (9:1 v/v) furnished the desired propargyl ester derivatives **20-22** in good yields.

### Propargyl 3,4,5-trihydroxybenzoate (20)

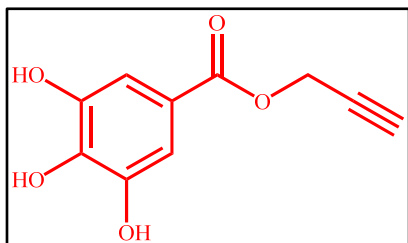

$^1\text{H}$  NMR (DMSO- $d_6$ , 300 MHz):  $\delta$  (ppm) 3.57 (t,  $J=2.43$  Hz, 1H, CH), 4.84 (d,  $J=2.43$  Hz, 2H,  $\text{CH}_2$ ), 6.95 (s, 2H, Ar), 9.27 (bs, 3H, OH).  $^{13}\text{C}$  NMR (DMSO- $d_6$ , 125 MHz):  $\delta$  (ppm) 52.88, 78.58, 79.82, 109.66, 119.56, 139.87, 146.69, 166.07. ESI(+)-MS:  $m/z$   $[\text{M}+\text{H}]^+$  calcd for  $[\text{C}_{10}\text{H}_9\text{O}_5]^+$ , 209.0444, found 209.0453.

### Propargyl 4-hydroxybenzoate (21)

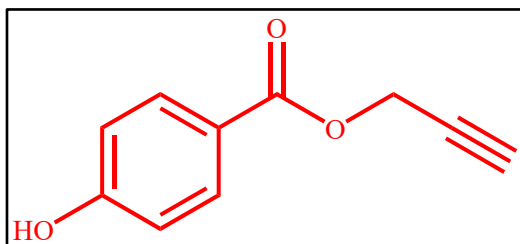

$^1\text{H}$  NMR (DMSO- $d_6$ , 300 MHz):  $\delta$  (ppm) 3.58 (t,  $J=2.42$  Hz, 1H, CH), 4.88 (d,  $J=2.42$  Hz, 2H,  $\text{CH}_2$ ), 6.81-6.90 (m, 2H, Ar), 7.78-7.87 (m, 2H, Ar), 10.46 (bs, 1H, OH).  $^{13}\text{C}$  NMR (DMSO- $d_6$ , 125 MHz):  $\delta$  (ppm) 52.86, 78.58, 79.71, 116.47, 120.52, 132.62, 163.31, 165.77. ESI(+)-MS:  $m/z$   $[\text{M}+\text{H}]^+$  calcd for  $[\text{C}_{10}\text{H}_9\text{O}_3]^+$ , 177.0546, found 177.0546.

### Propargyl (*E*)-3-(3,4-dihydroxyphenyl)acrylate (22)

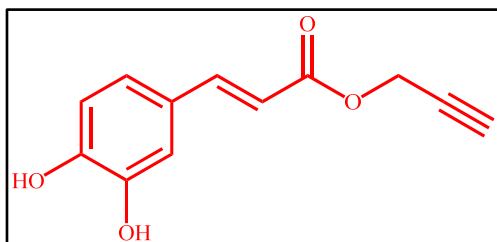

$^1\text{H}$  NMR (DMSO- $d_6$ , 300 MHz):  $\delta$  (ppm) 3.55 (t,  $J=2.41$  Hz, 1H,  $\text{C}\equiv\text{C}-\text{H}$ ), 4.79 (d,  $J=2.42$  Hz, 2H,  $\text{C}\equiv\text{C}-\text{CH}_2$ ), 6.31 (d,  $J=15.91$  Hz, 1H,  $\text{O}=\text{C}-\text{C}-\text{H}$ ), 6.77 (d,  $J=8.10$  Hz, 1H, Ar), 6.99-7.11 (m, 2H, Ar), 7.53 (d,  $J=15.91$  Hz, 1H,  $\text{OC}-\text{C}=\text{C}-\text{H}$ ), 9.46 (bs, 2H, OH).  $^{13}\text{C}$  NMR (DMSO- $d_6$ , 125 MHz):  $\delta$  (ppm) 52.65, 78.57, 79.94, 114.14, 115.92, 116.96, 123.00, 126.54, 146.76, 147.35, 149.85, 167.03. ESI(+)-MS:  $m/z$

$[\text{M}+\text{H}]^+$  calcd for  $[\text{C}_{12}\text{H}_{11}\text{O}_4]^+$ , 219.0652, found 219.0650.

## Characterization spectra of 1-(2-bromoethyl) isatins 6-9.

### 1-(2-Bromoethyl)isatin (6)

#### $^1\text{H}$ NMR (300 MHz)

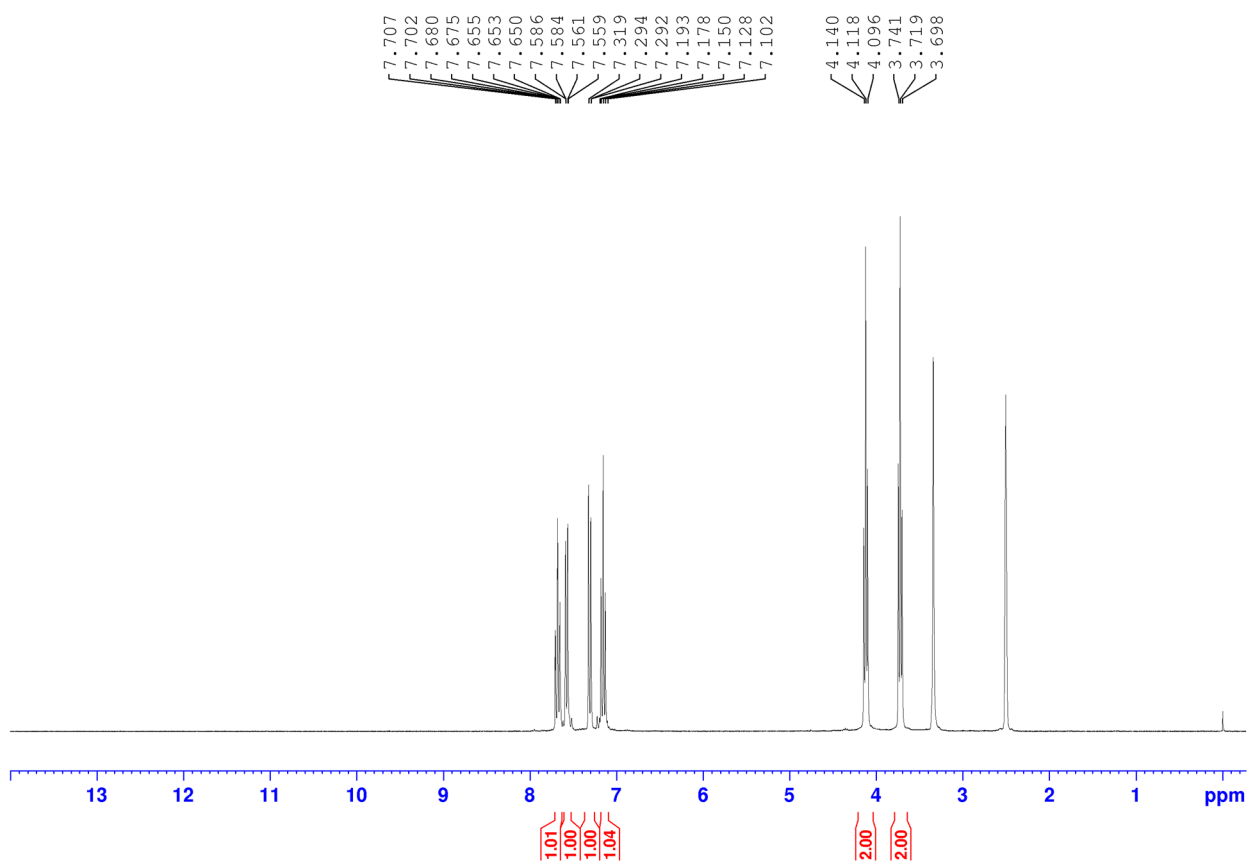

**$^{13}\text{C}$  NMR (500 MHz)**

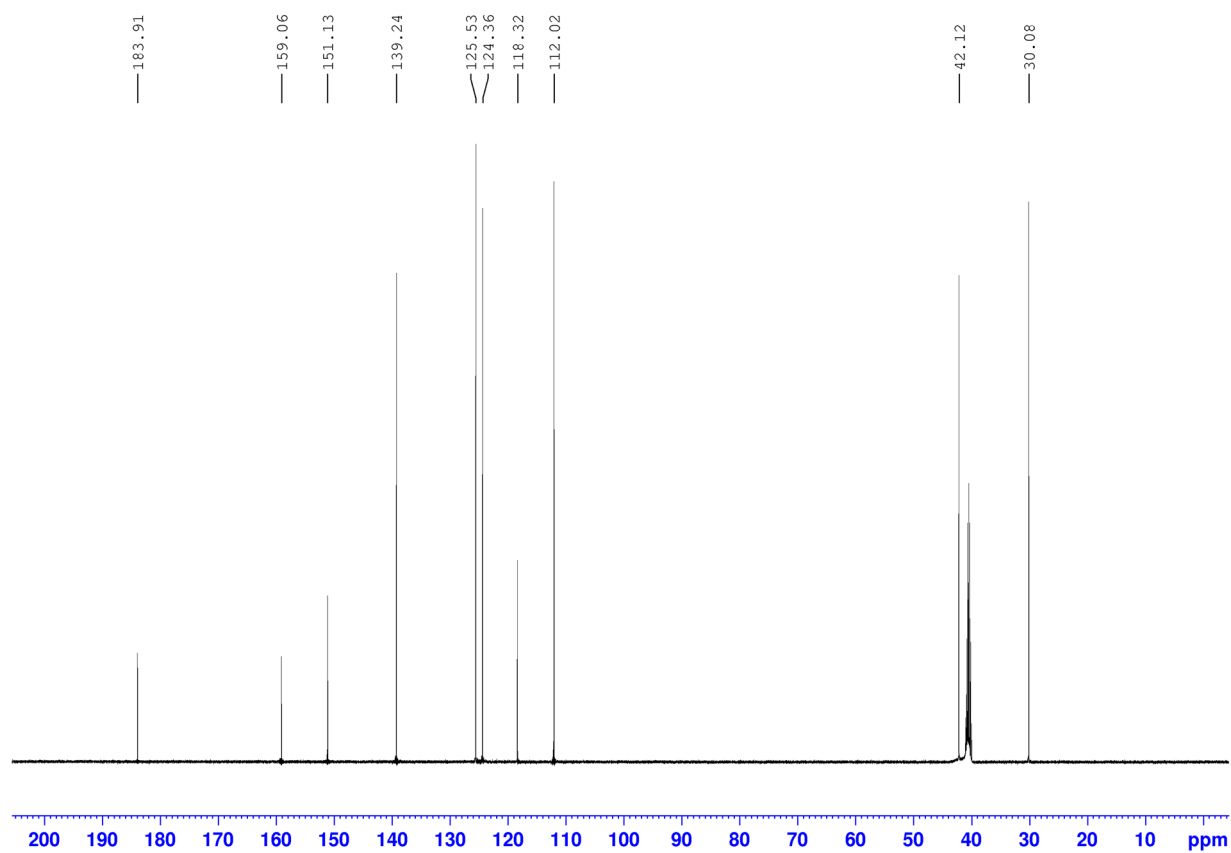

# COSY NMR (300 MHz)

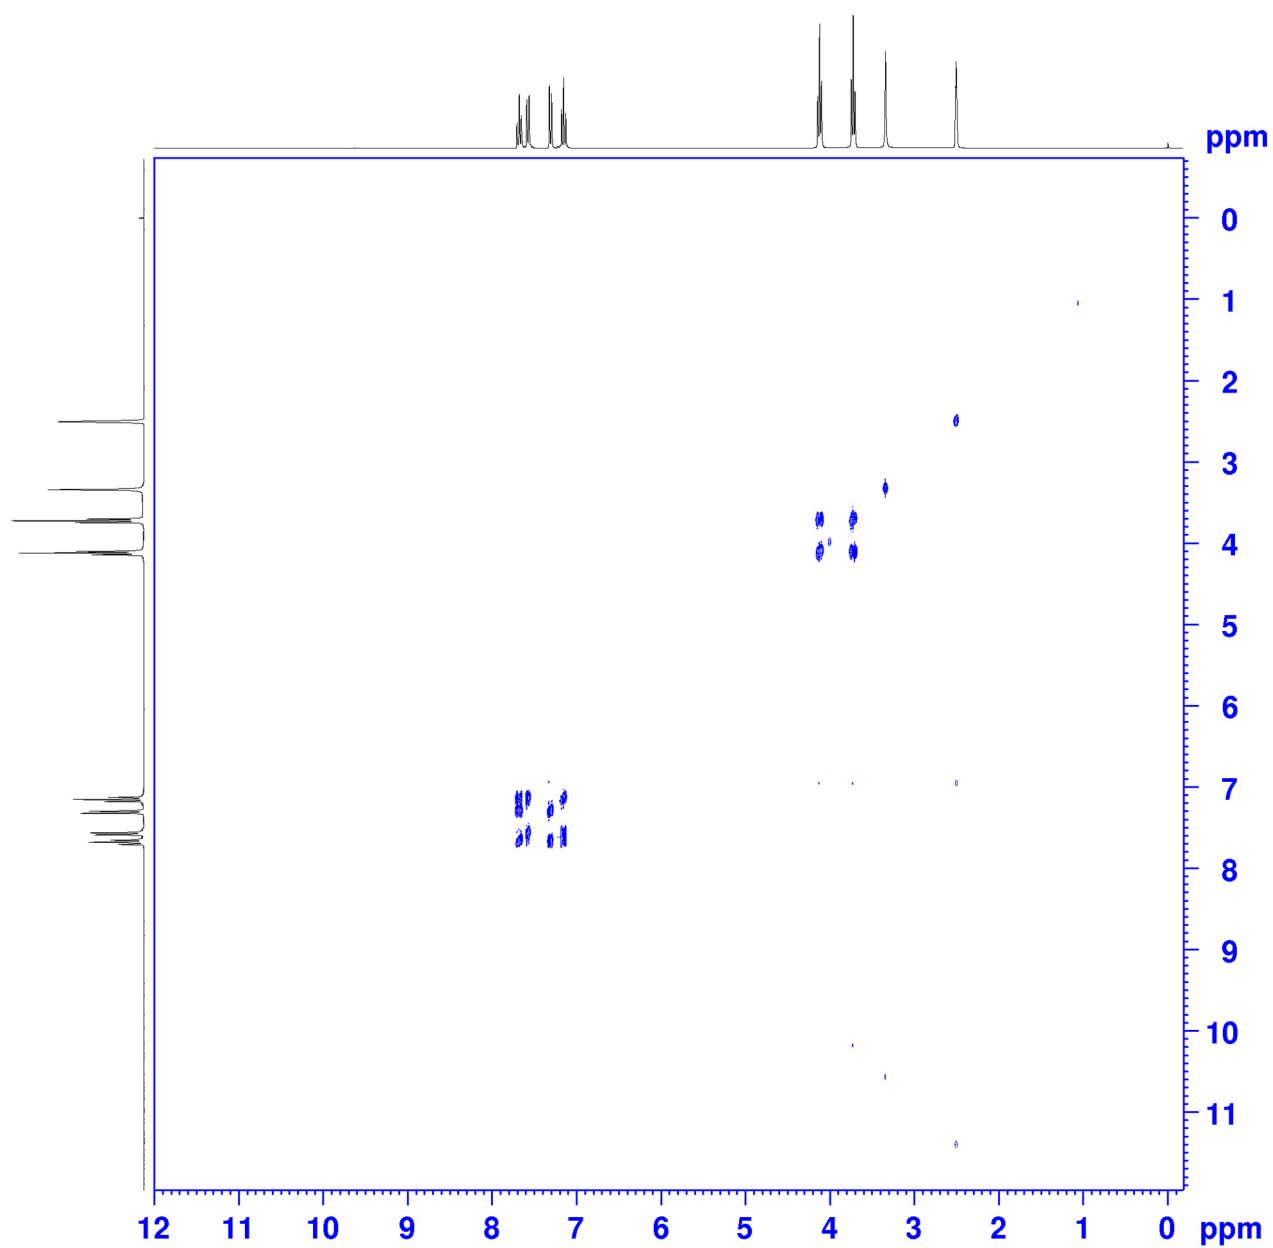

HRMS

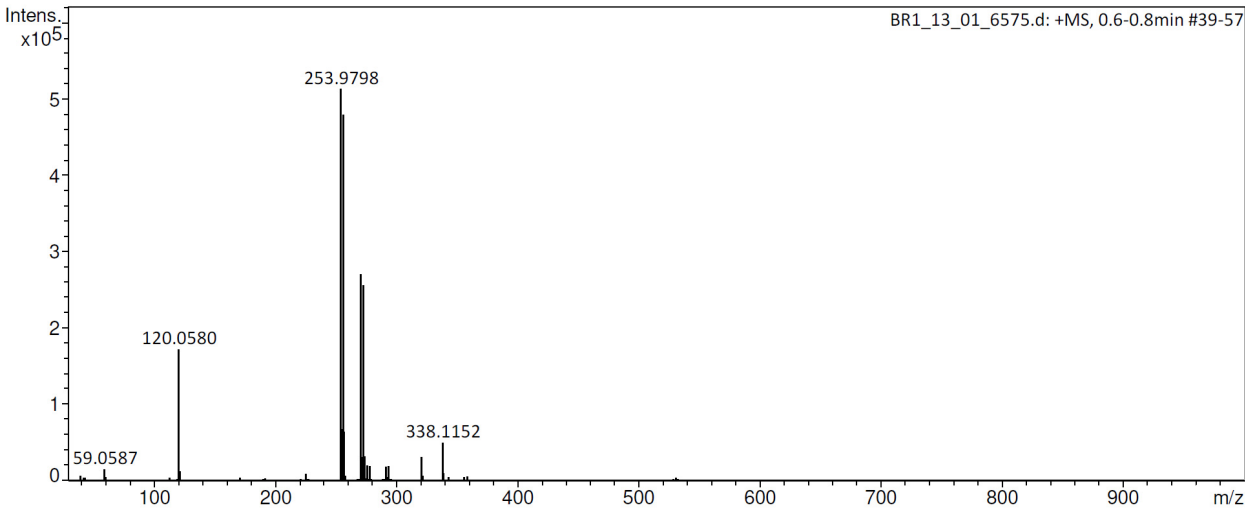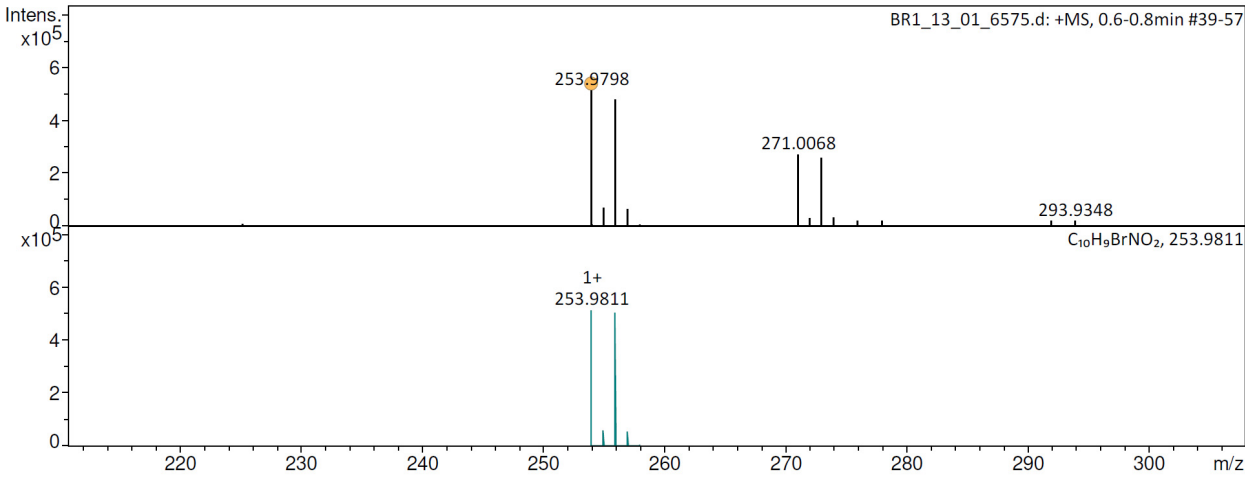

# 1-(2-Bromoethyl)-5-methylisatin (7)

## $^1\text{H}$ NMR (300 MHz)

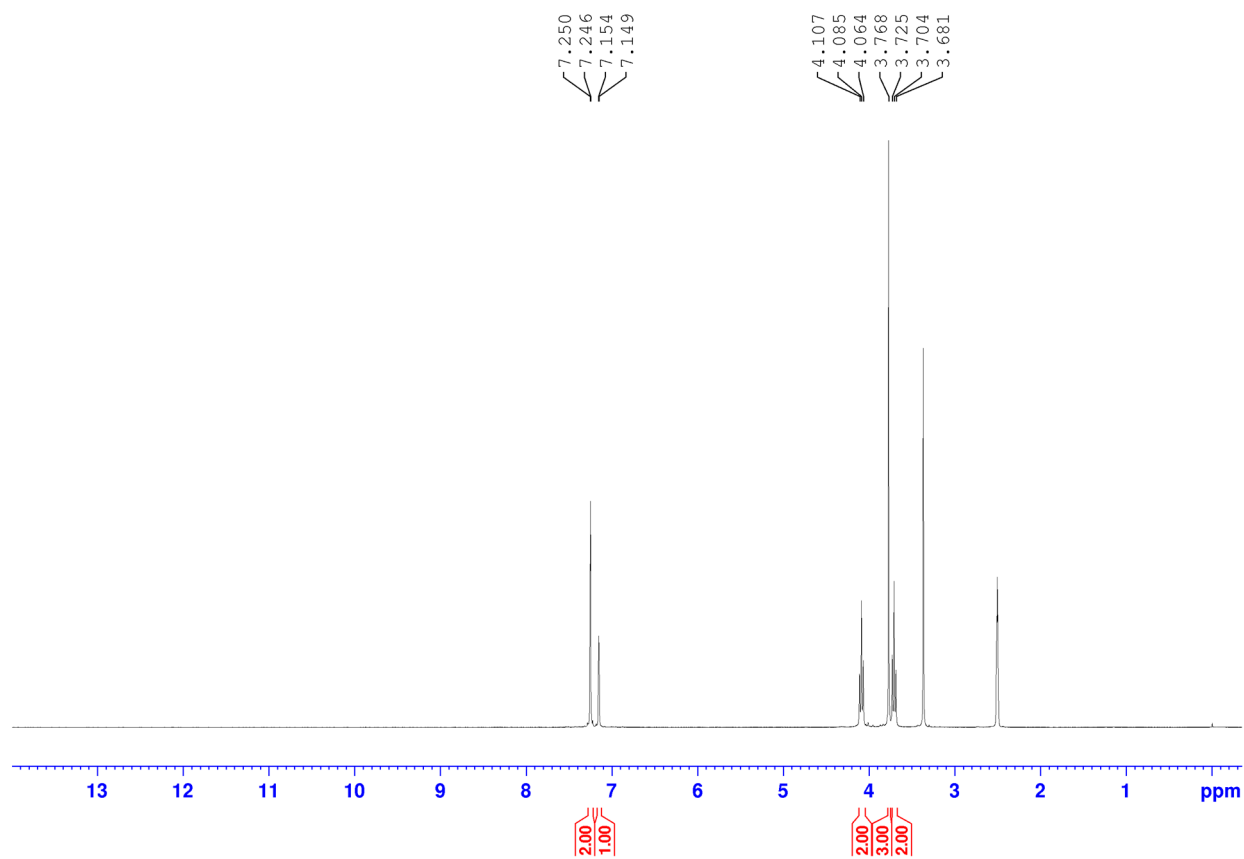

**$^{13}\text{C}$  NMR (125 MHz)**

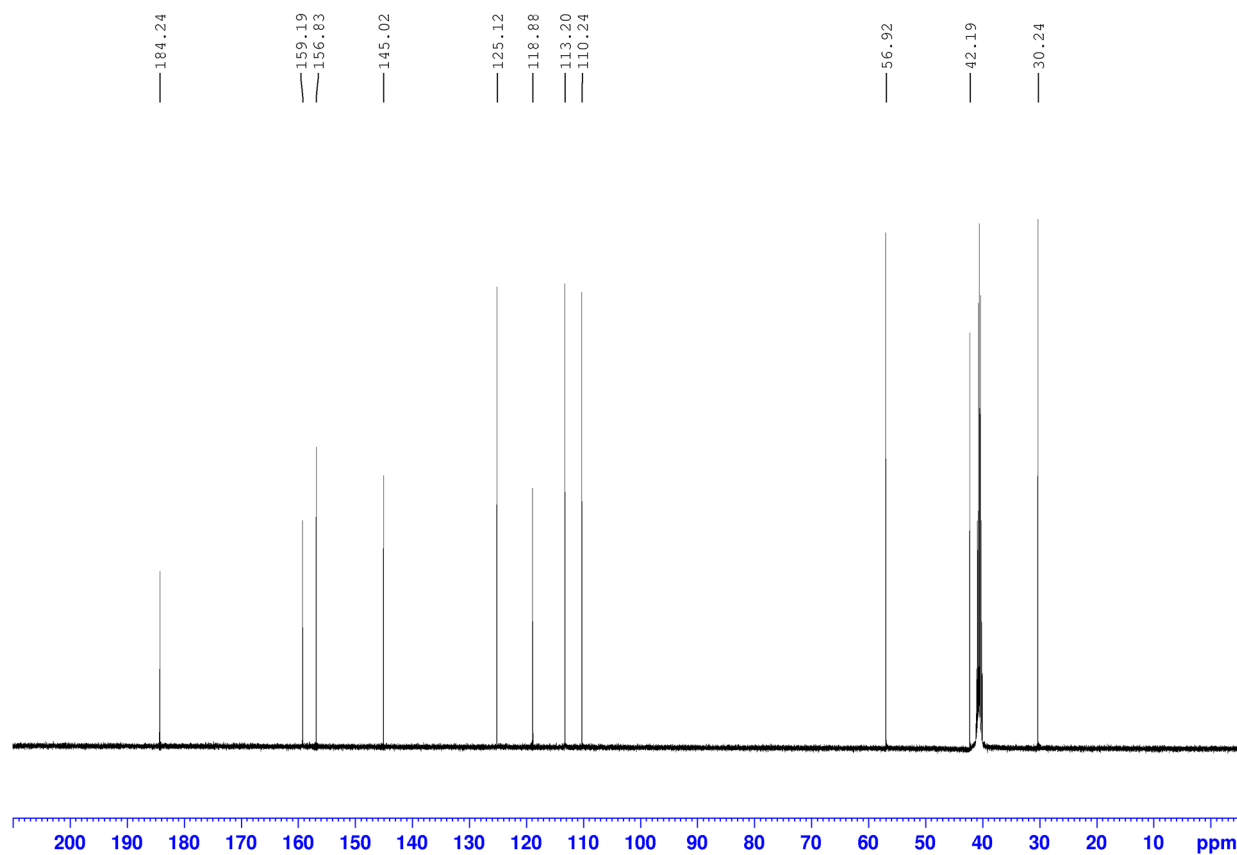



# COSY NMR (300 MHz)

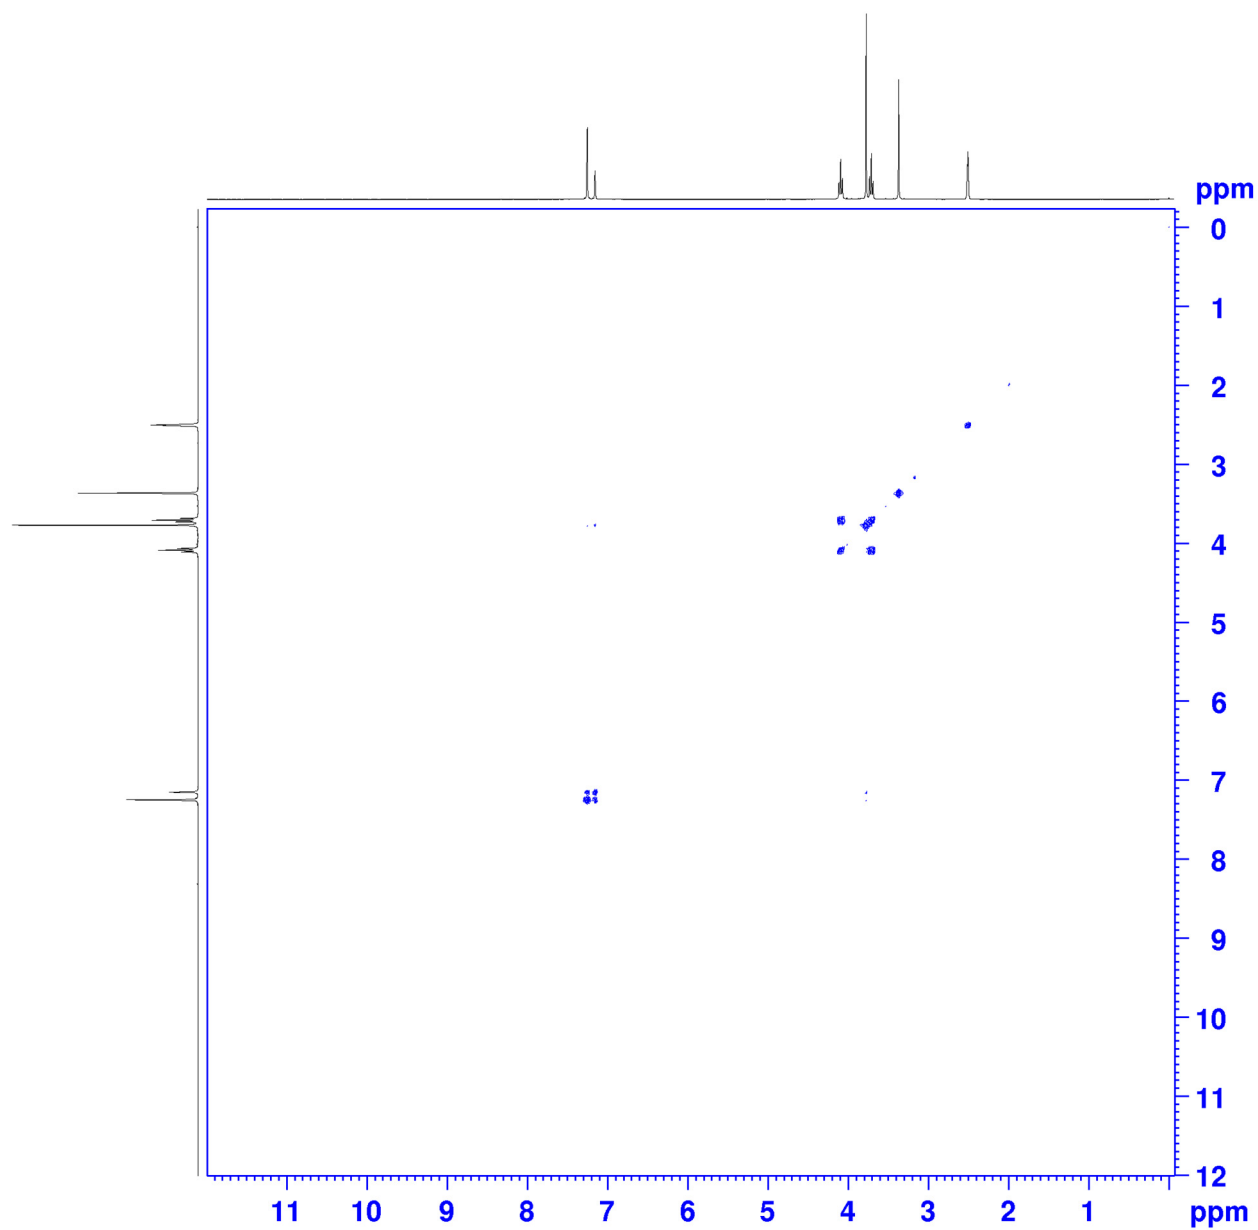

HRMS

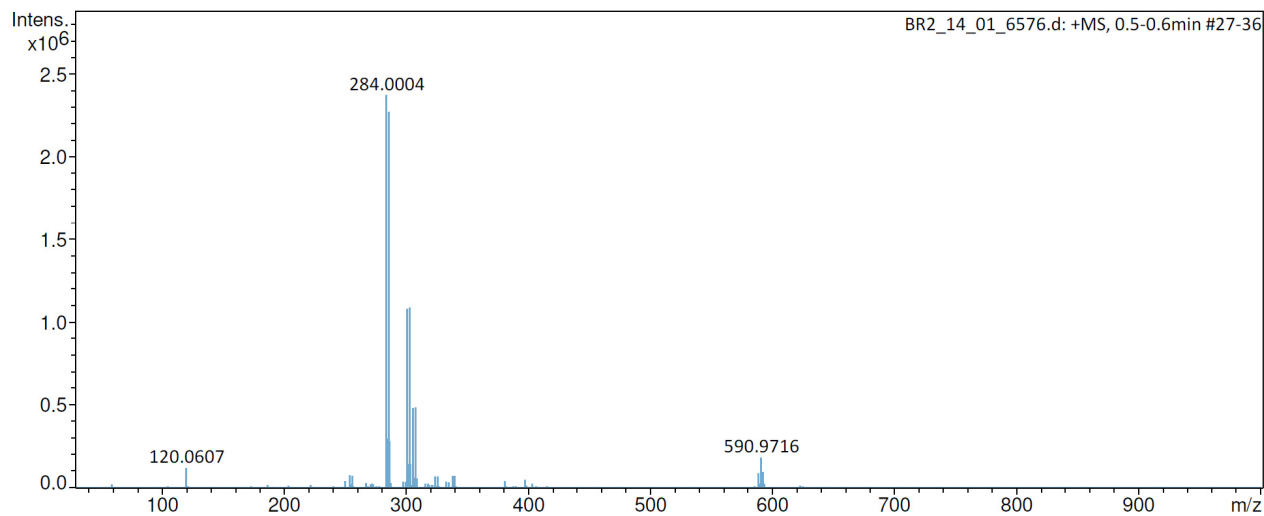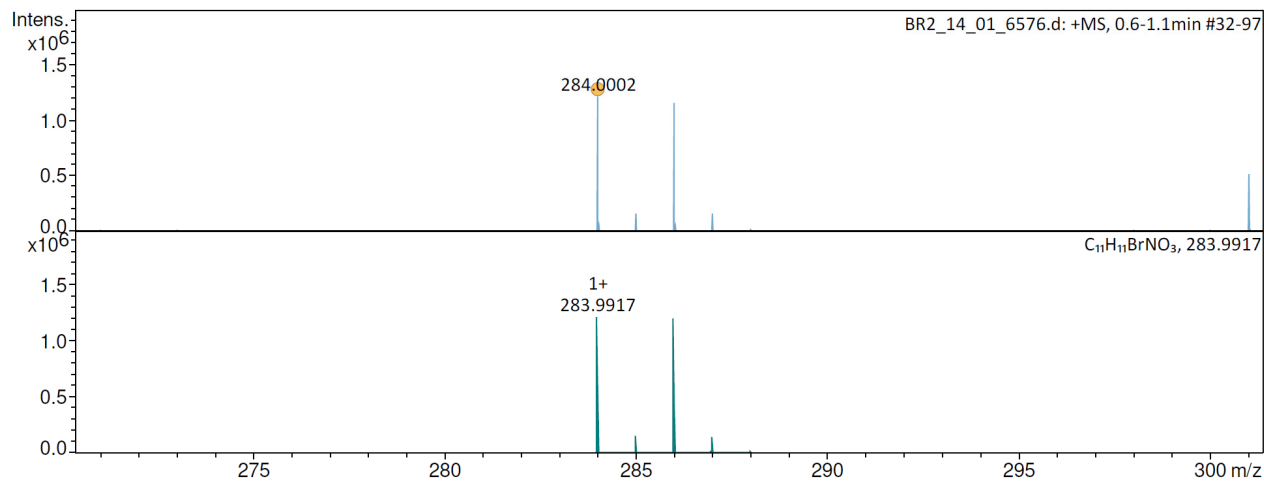

# 1-(2-Bromoethyl)-5-nitroisatin (8)

## $^1\text{H}$ NMR (300 MHz)

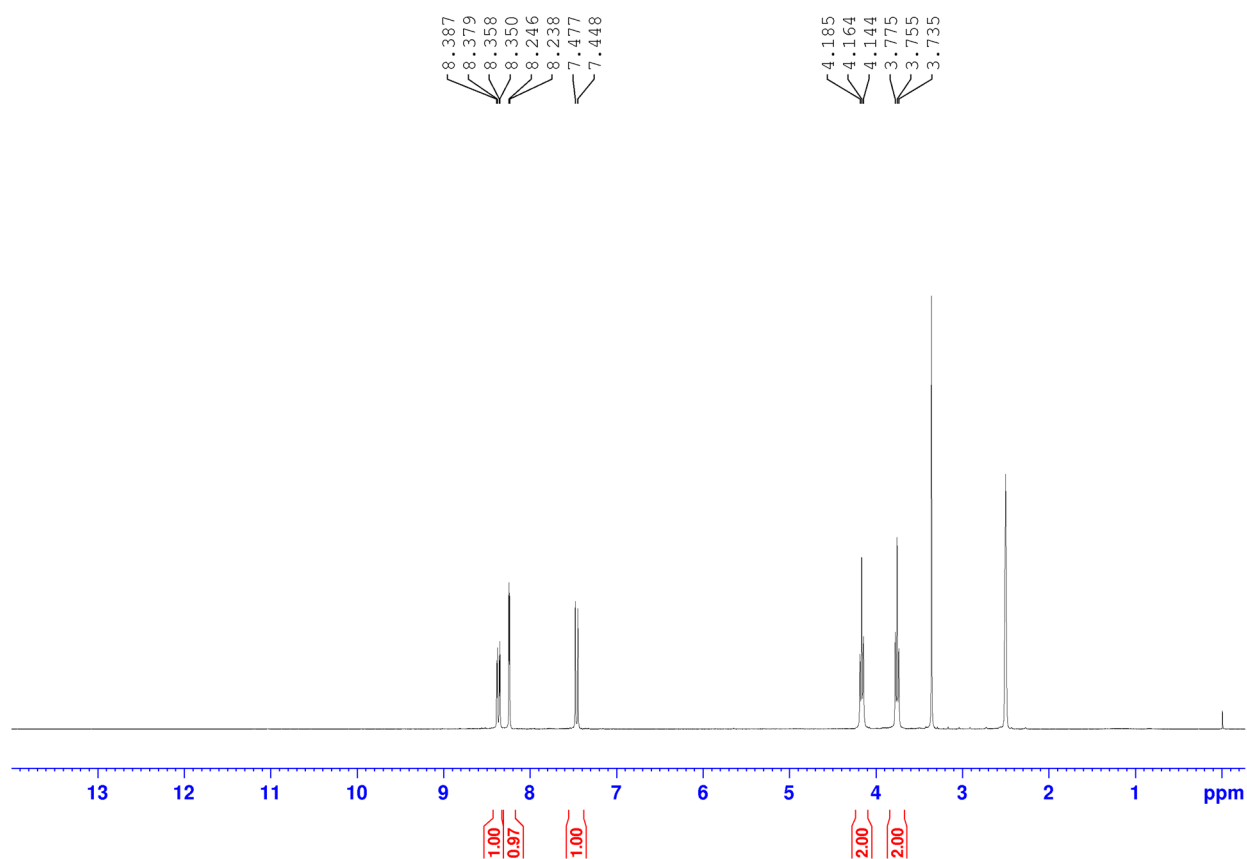

**$^{13}\text{C}$  NMR (125 MHz)**

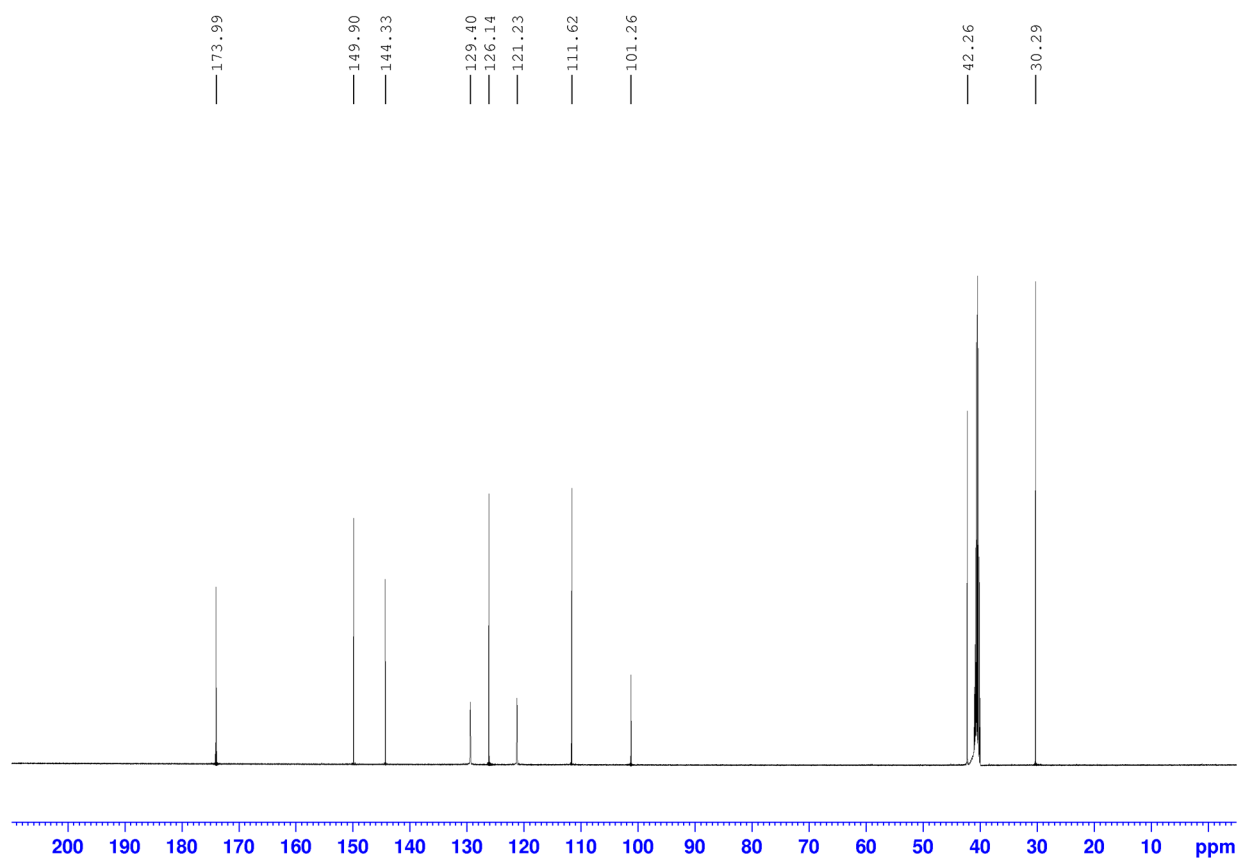

# COSY NMR (300 MHz)

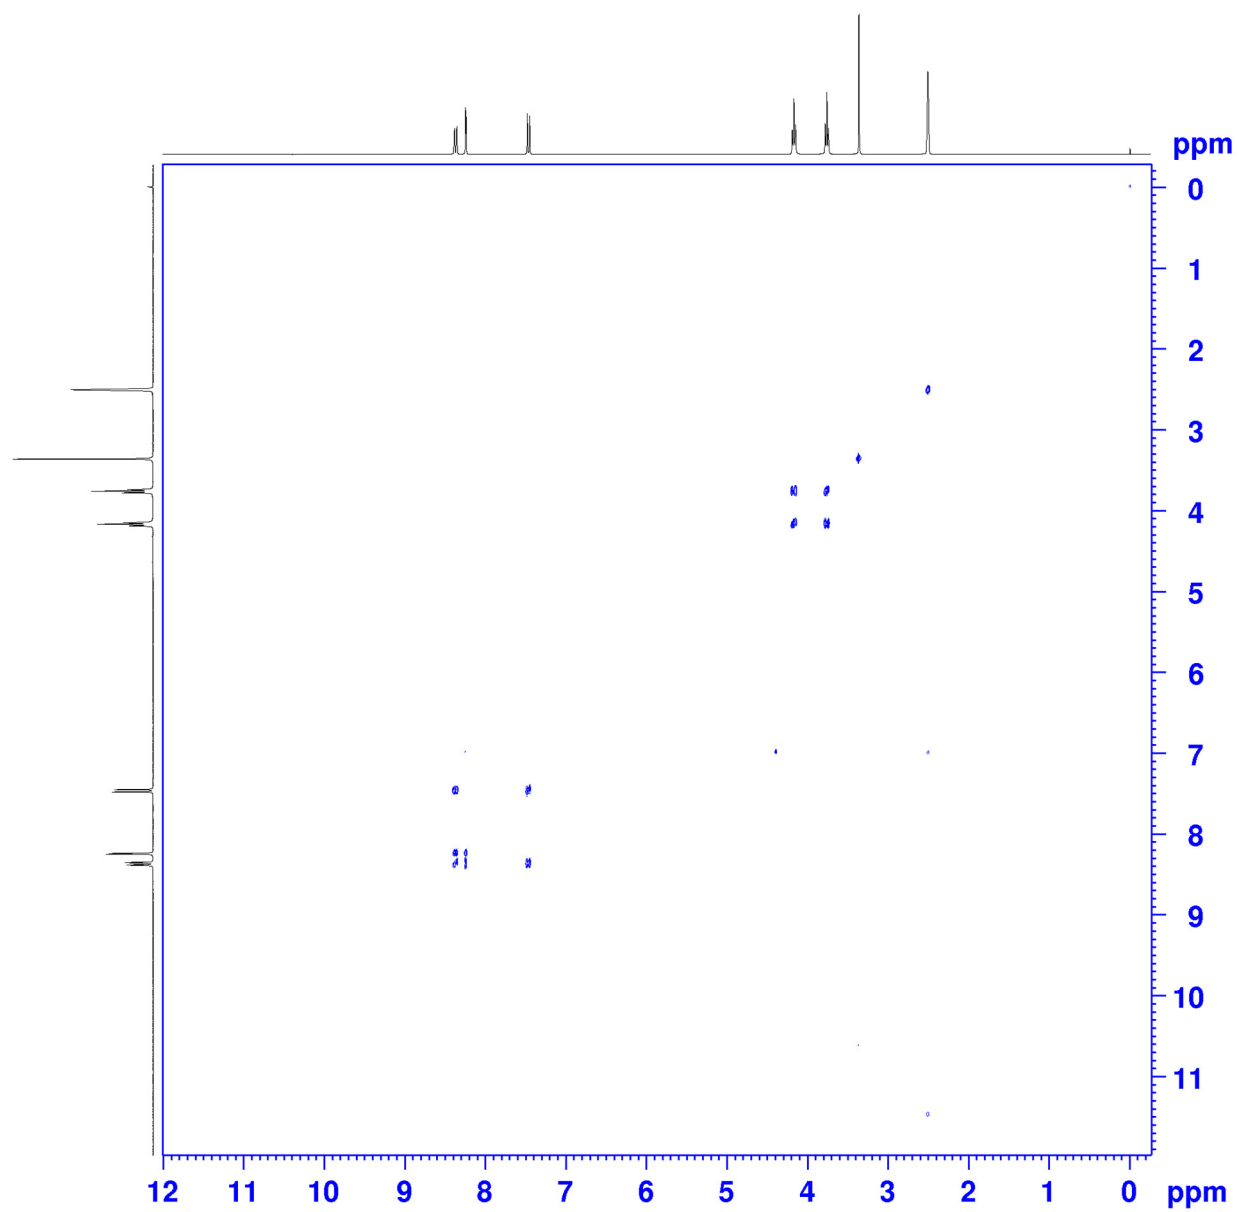

# HRMS

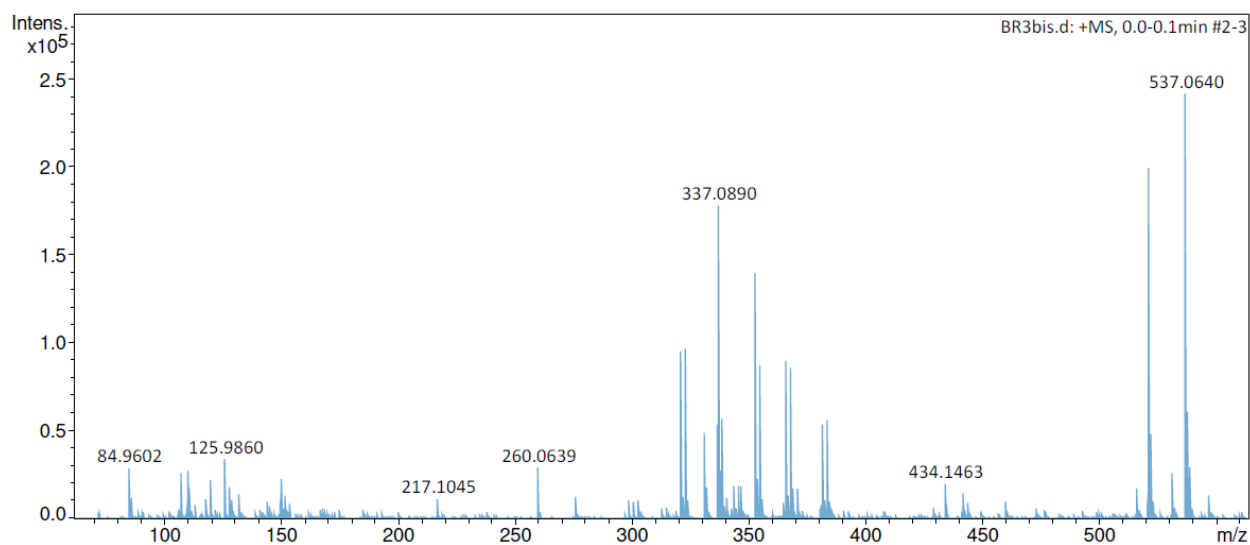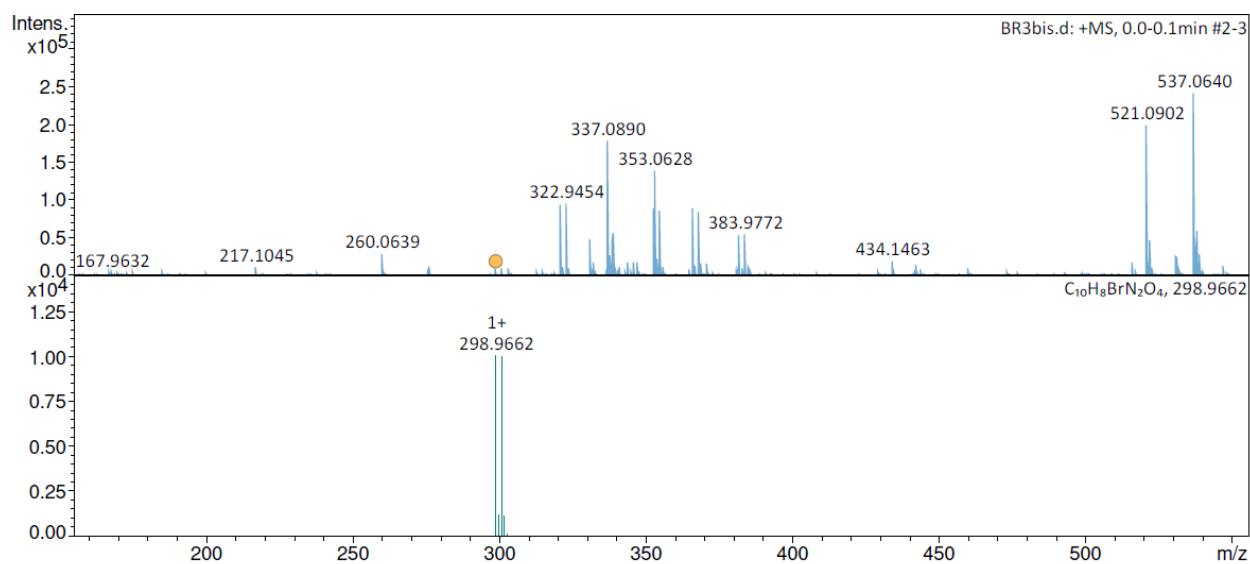

# 1-(2-Bromoethyl)-5-chloroisatin (9)

## $^1\text{H}$ NMR (300 MHz)

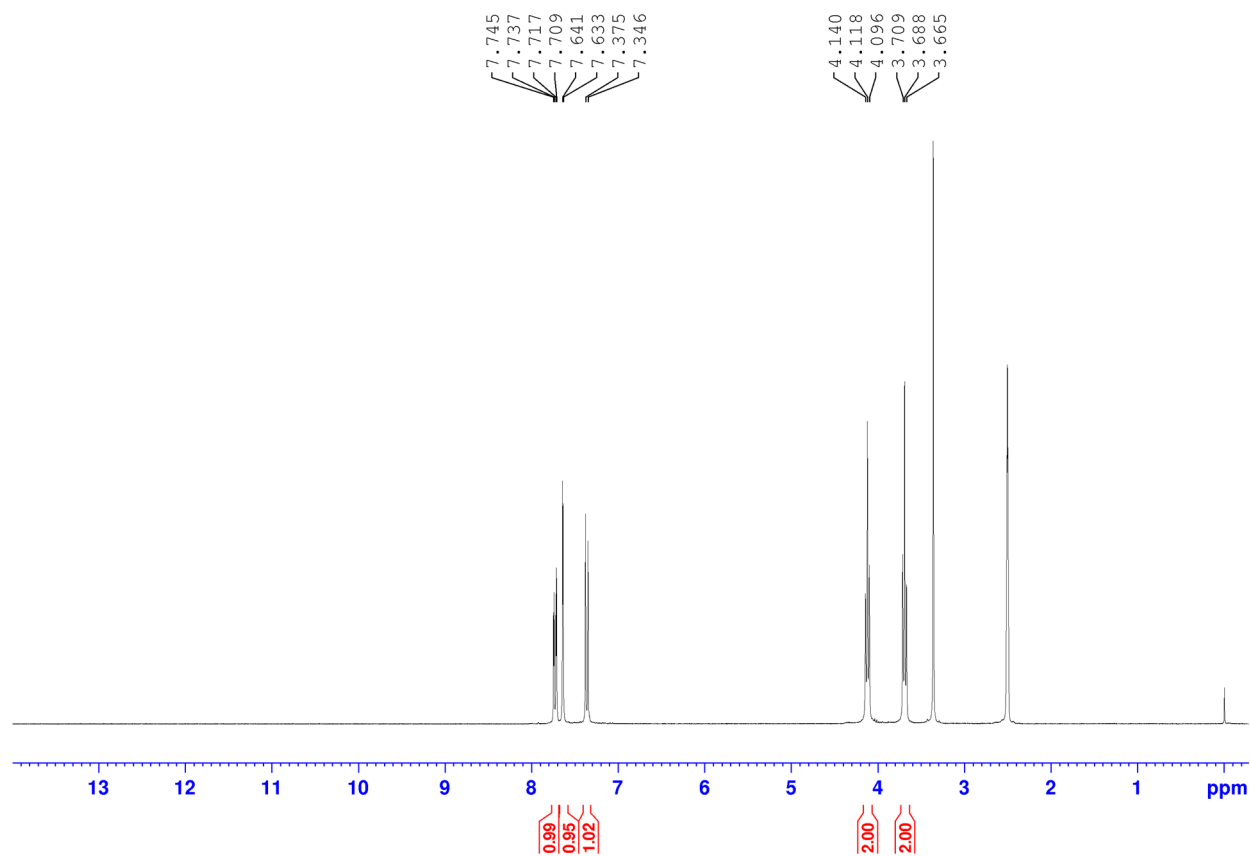

**$^{13}\text{C}$  NMR (500 MHz)**

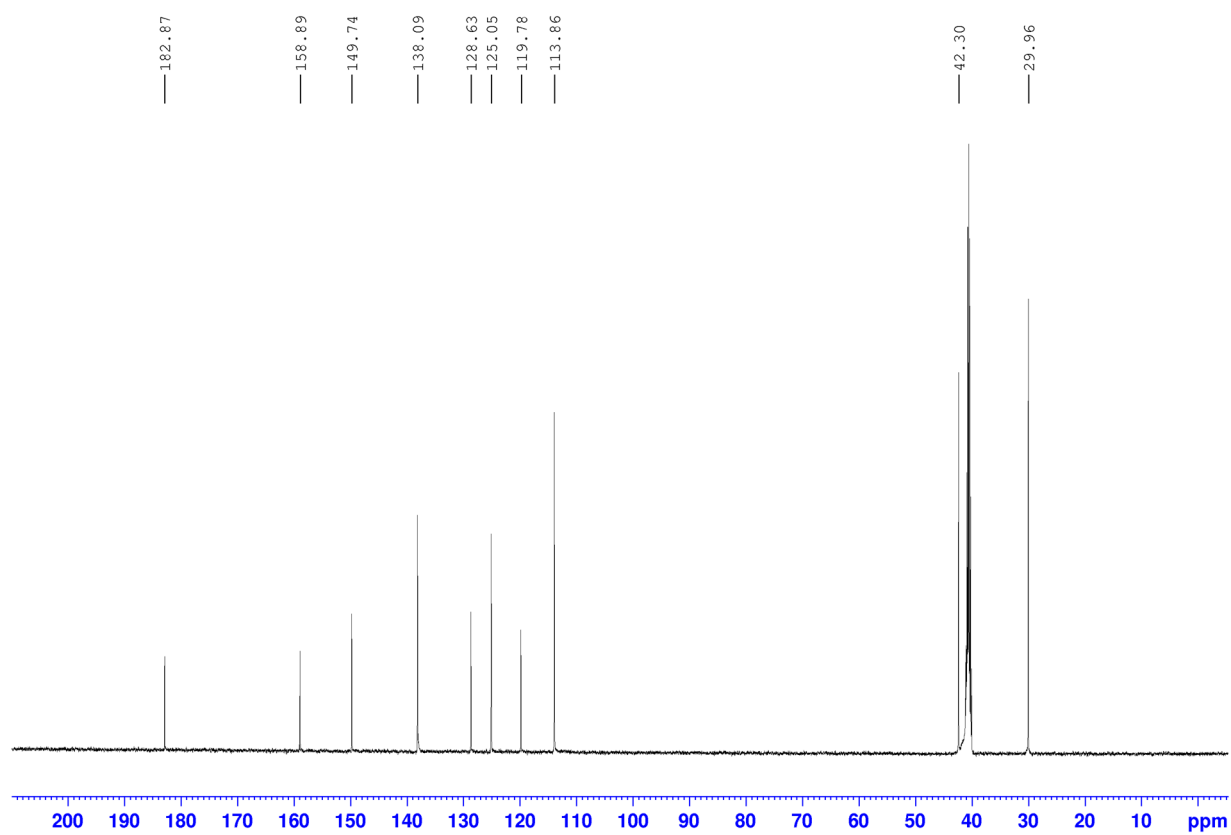



# COSY NMR (300 MHz)

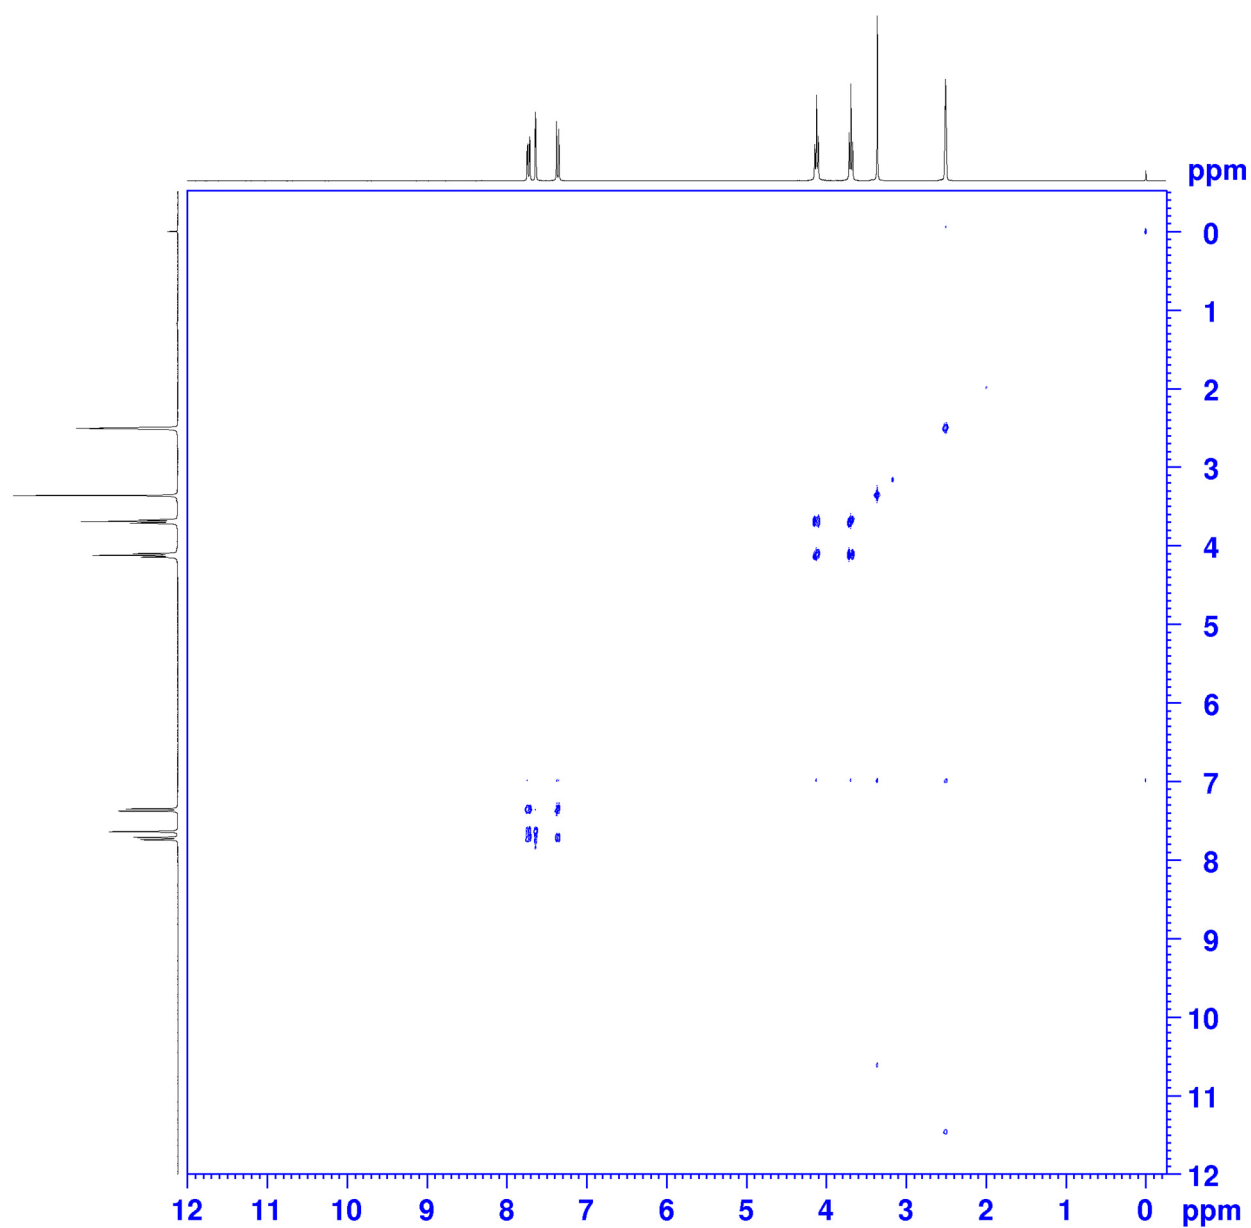

## Characterization spectra of 1-(2-azidoethyl) isatins 10-13.

### 1-(2-azidoethyl)isatin (10)

#### $^1\text{H}$ NMR (300 MHz)

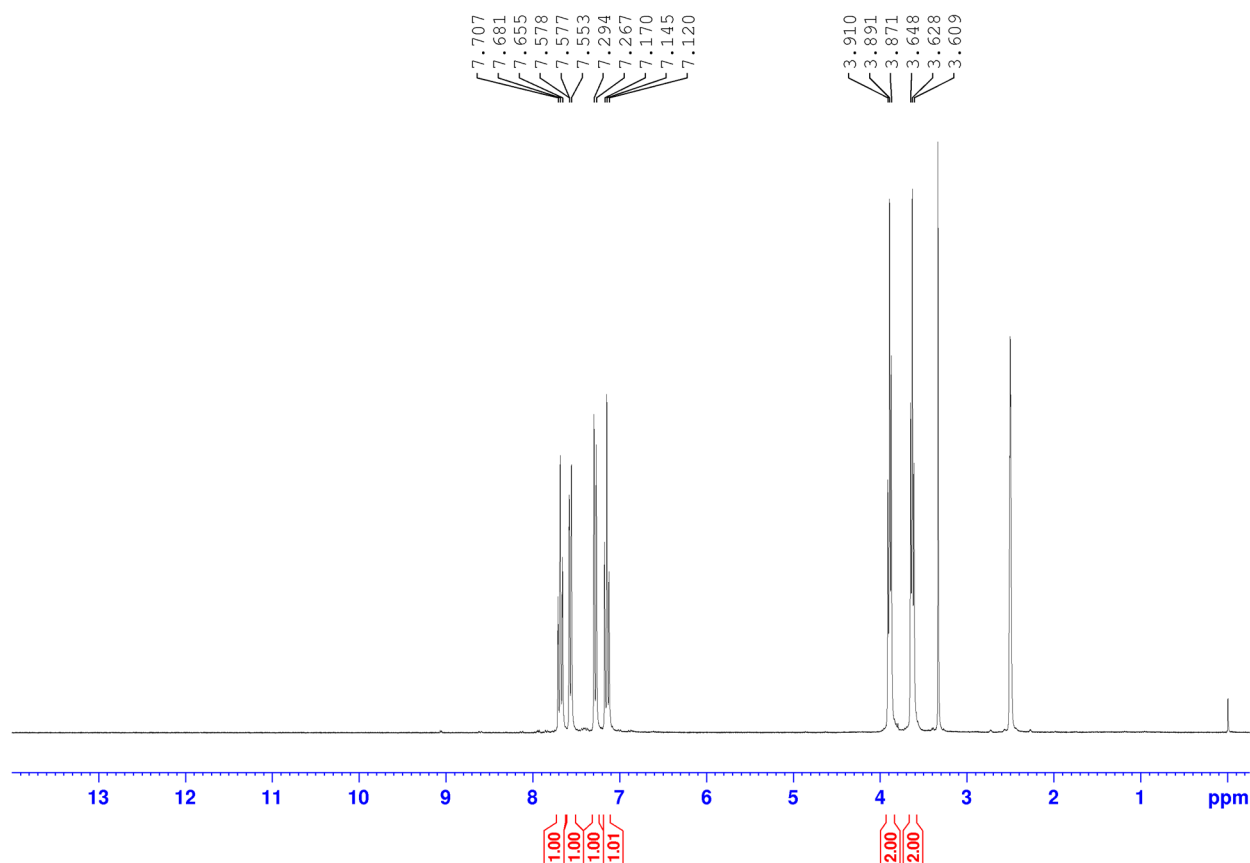

**$^{13}\text{C}$  NMR (125 MHz)**

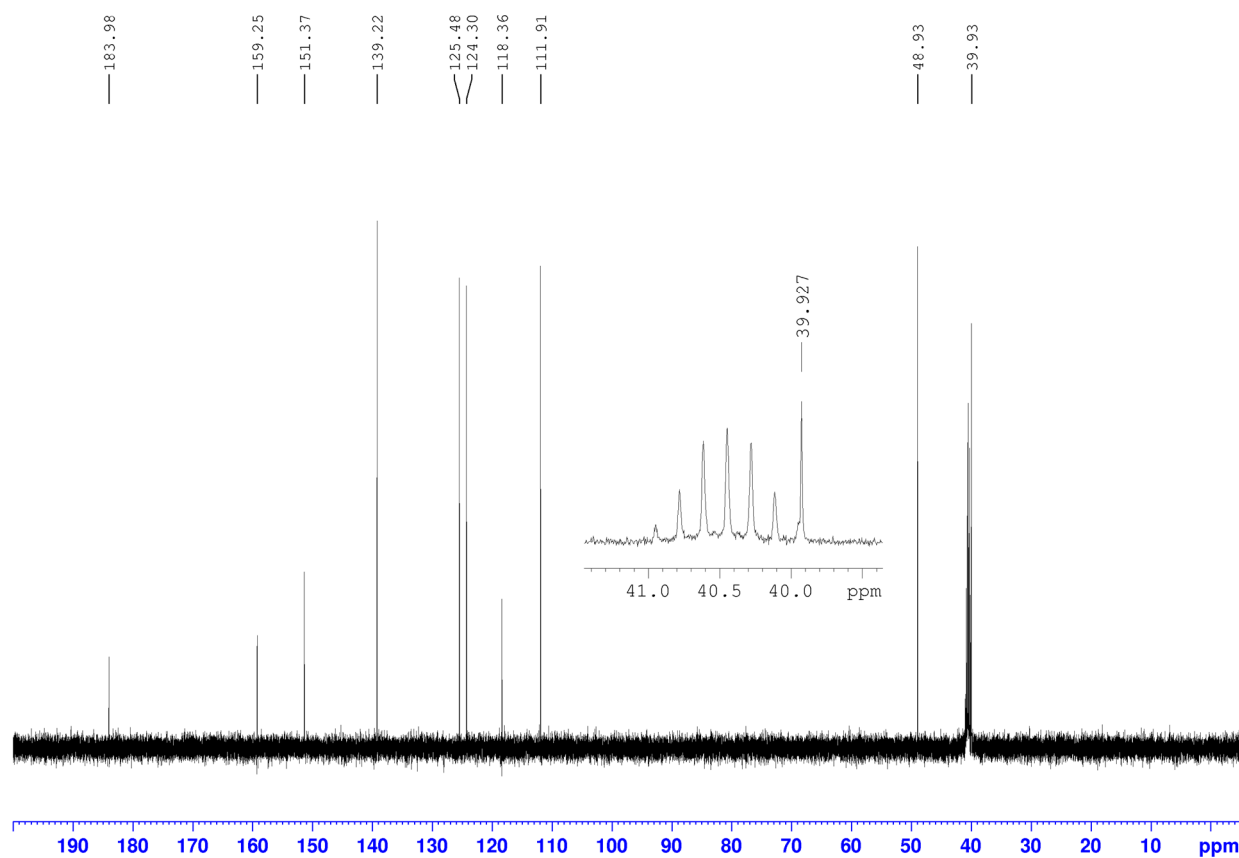

# COSY NMR (300 MHz)

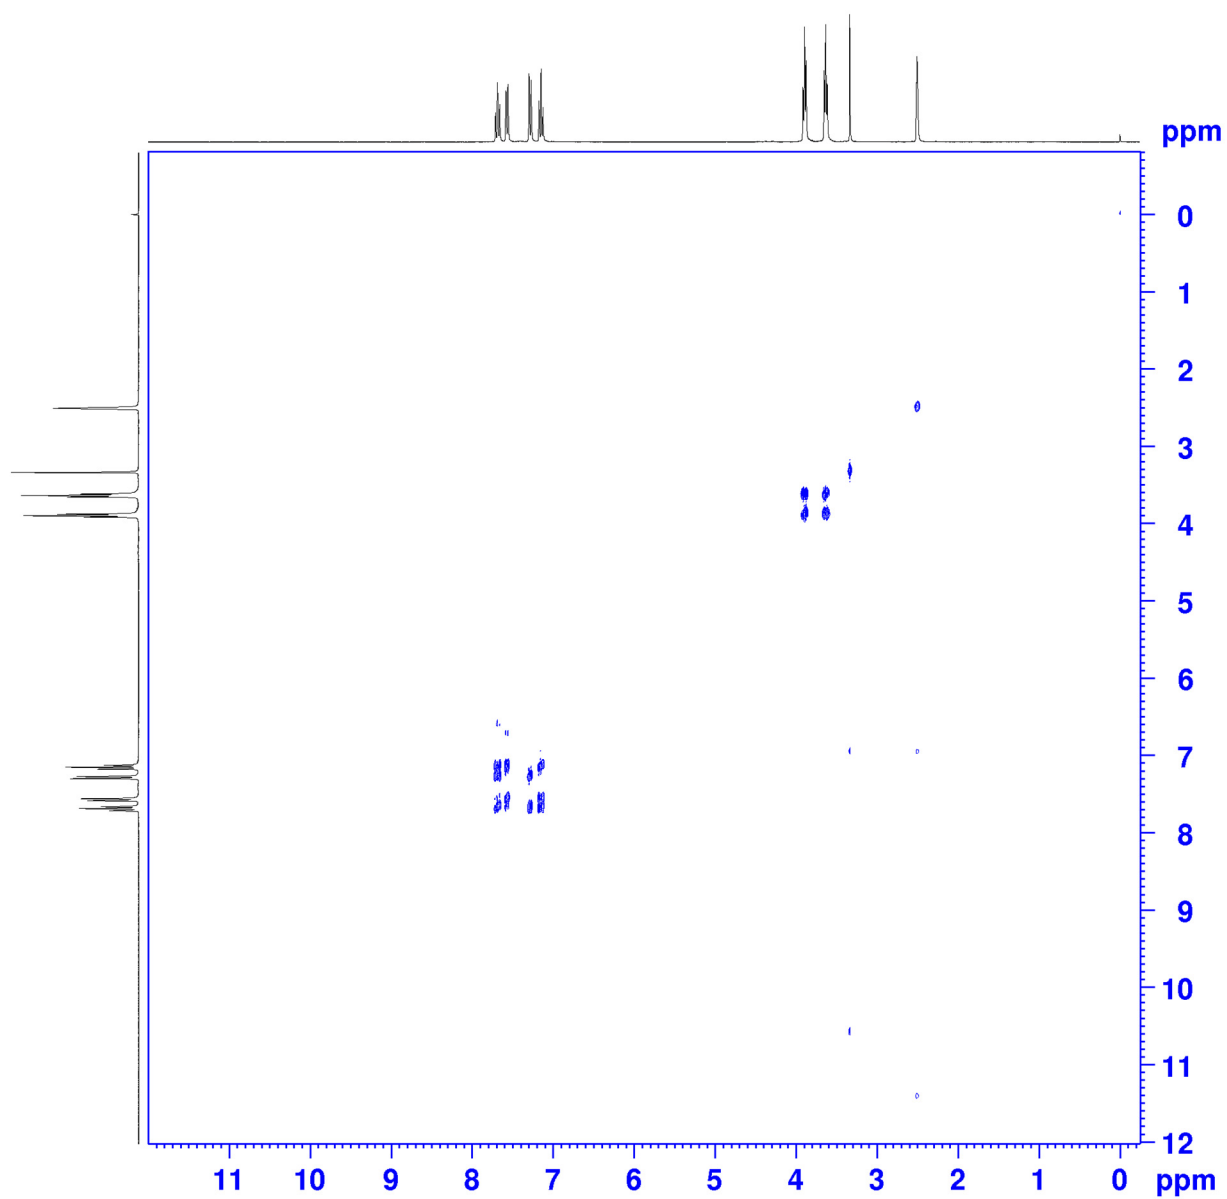

HRMS

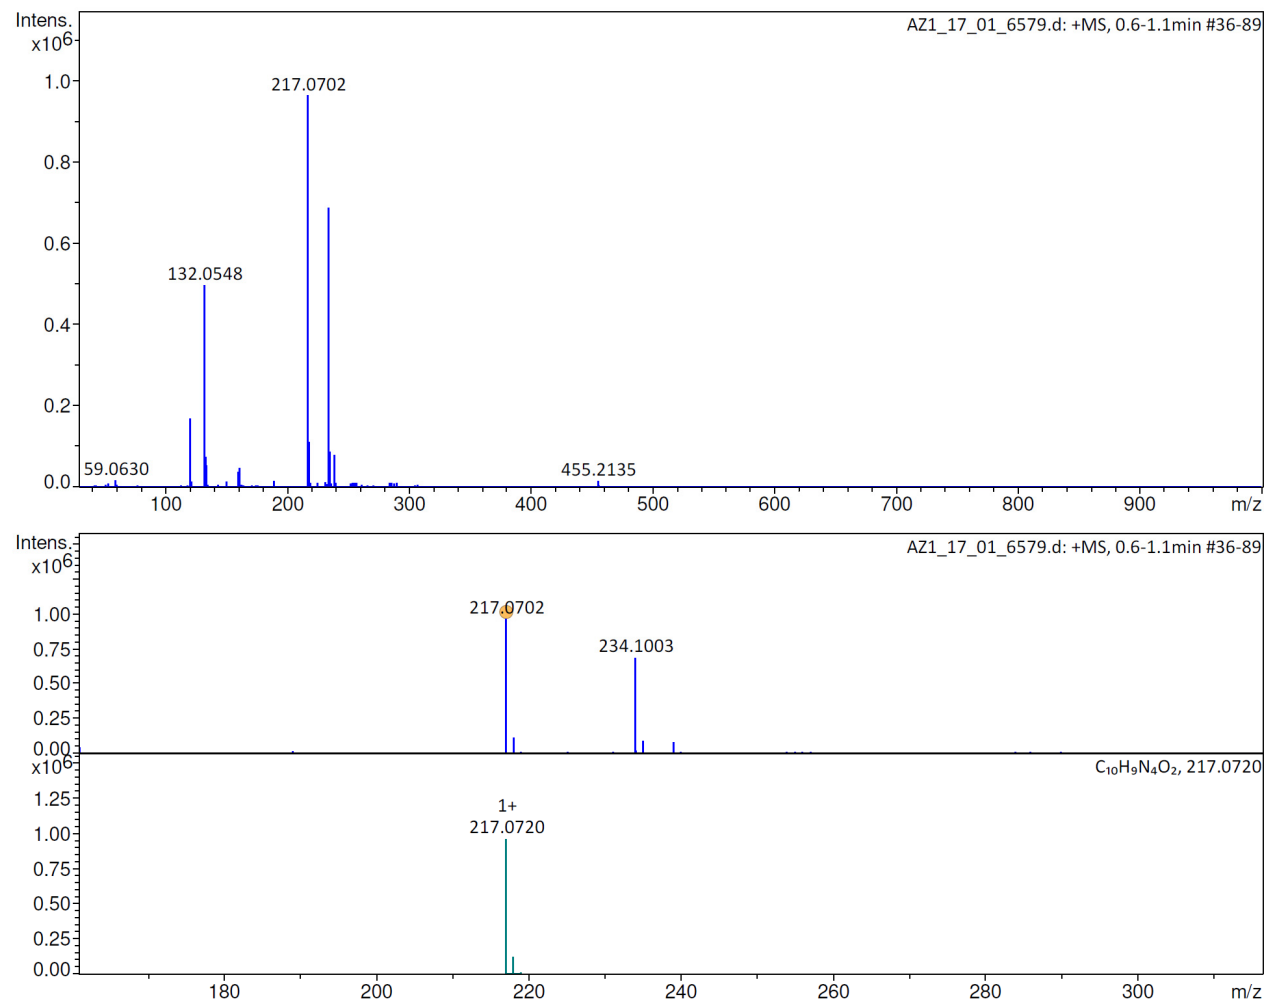

# 1-(2-azidoethyl)-5-methylisatin (11)

$^1\text{H}$  NMR (300 MHz)

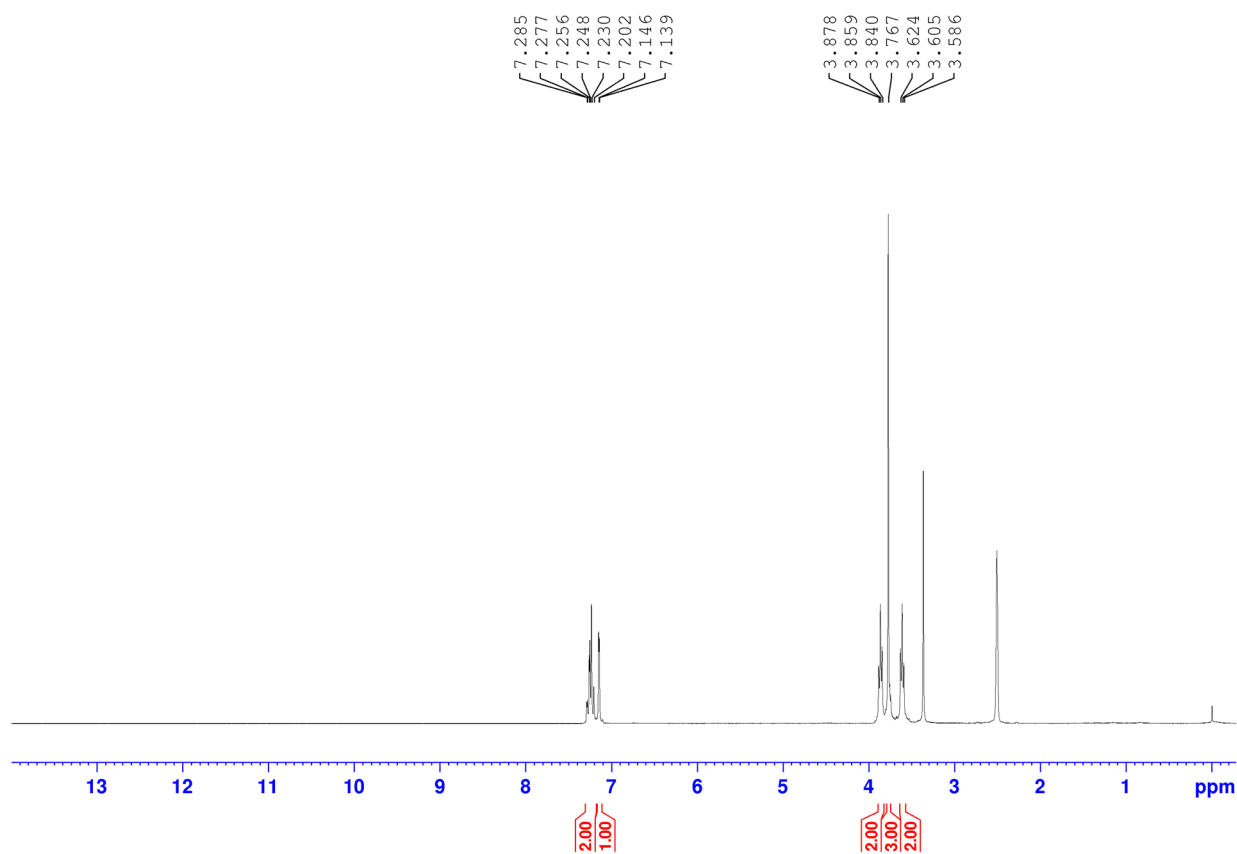

**$^{13}\text{C}$  NMR (125 MHz)**

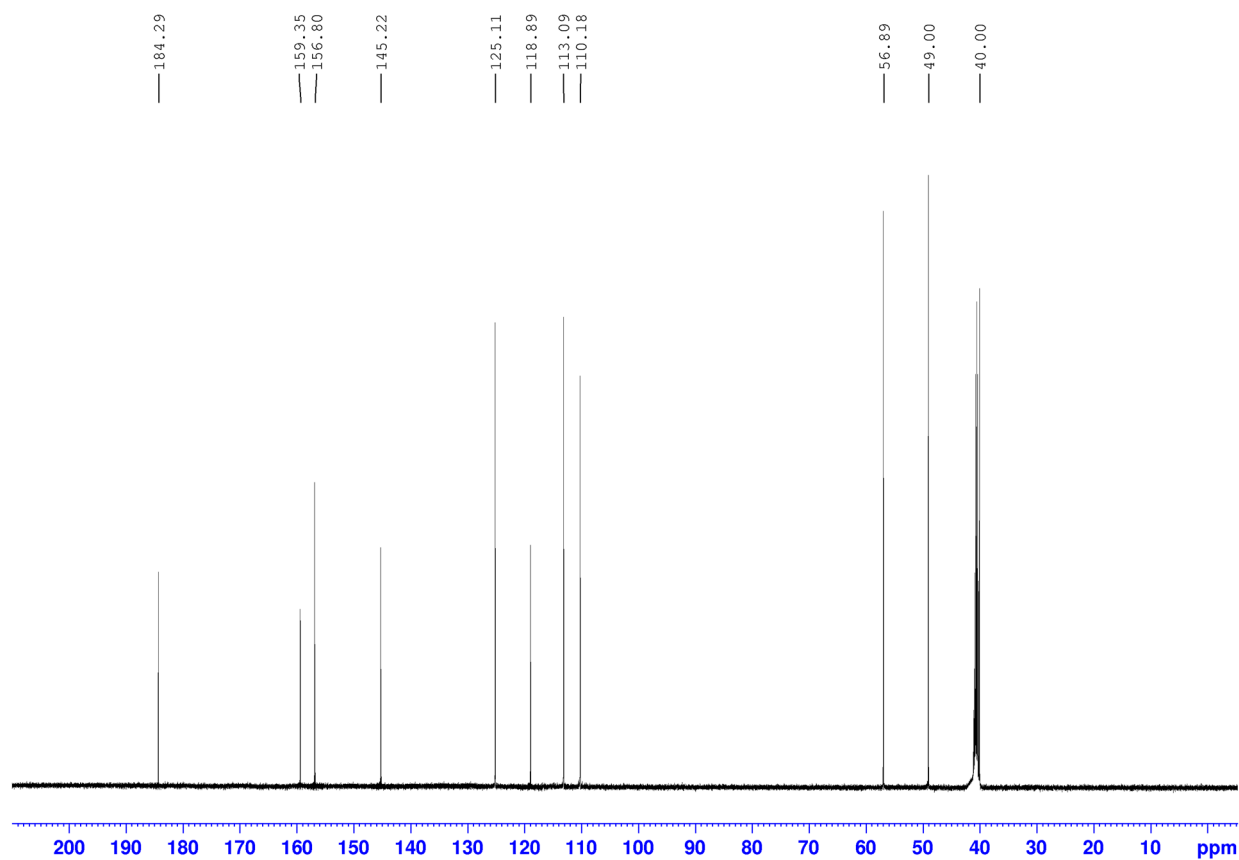

# COSY NMR (300 MHz)

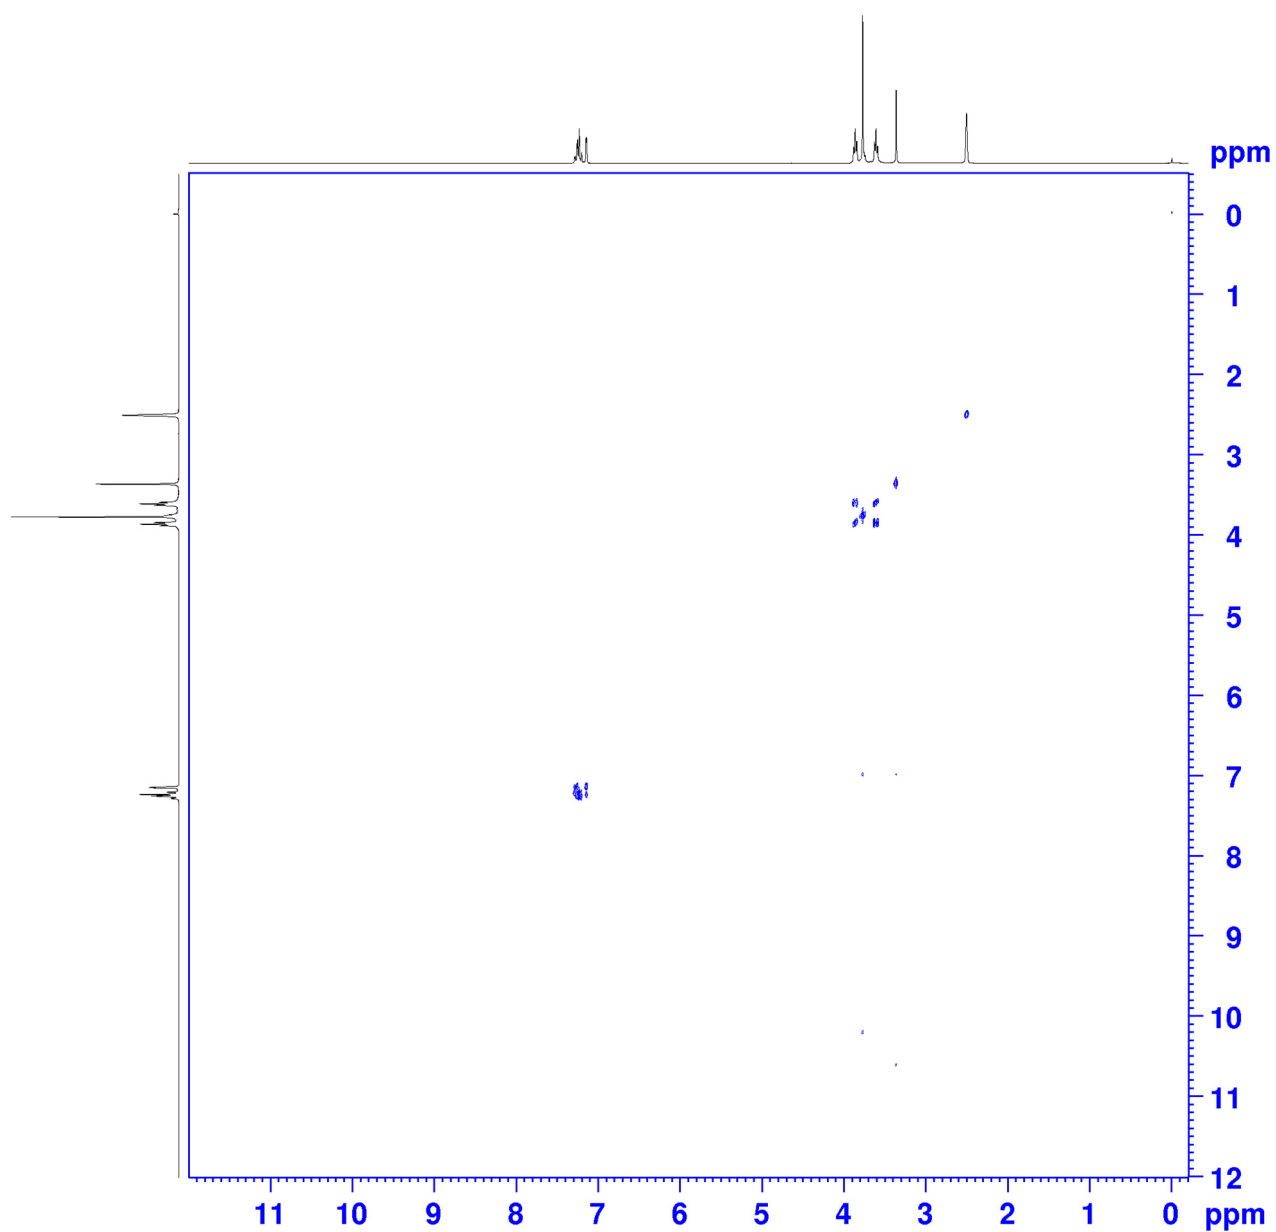



# HRMS

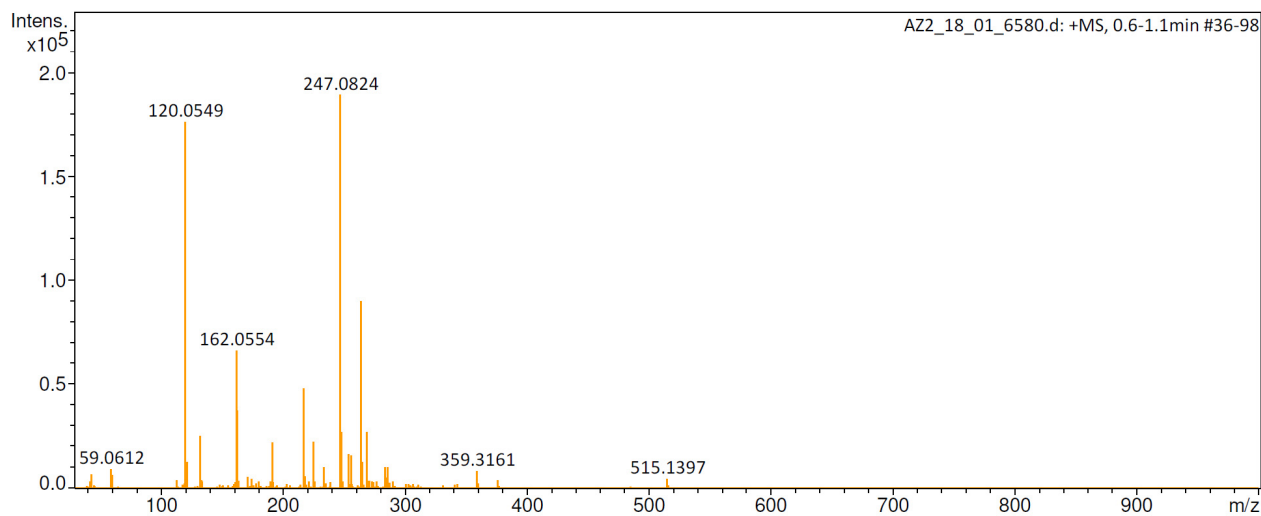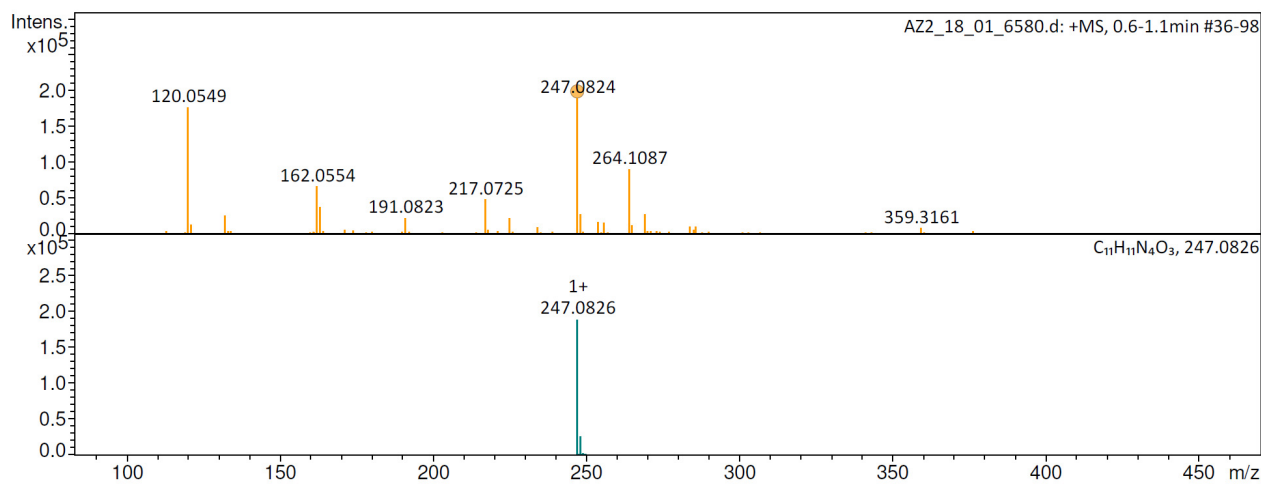

# 1-(2-azidoethyl)-5-nitroisatin (12)

## <sup>1</sup>H NMR (300 MHz)

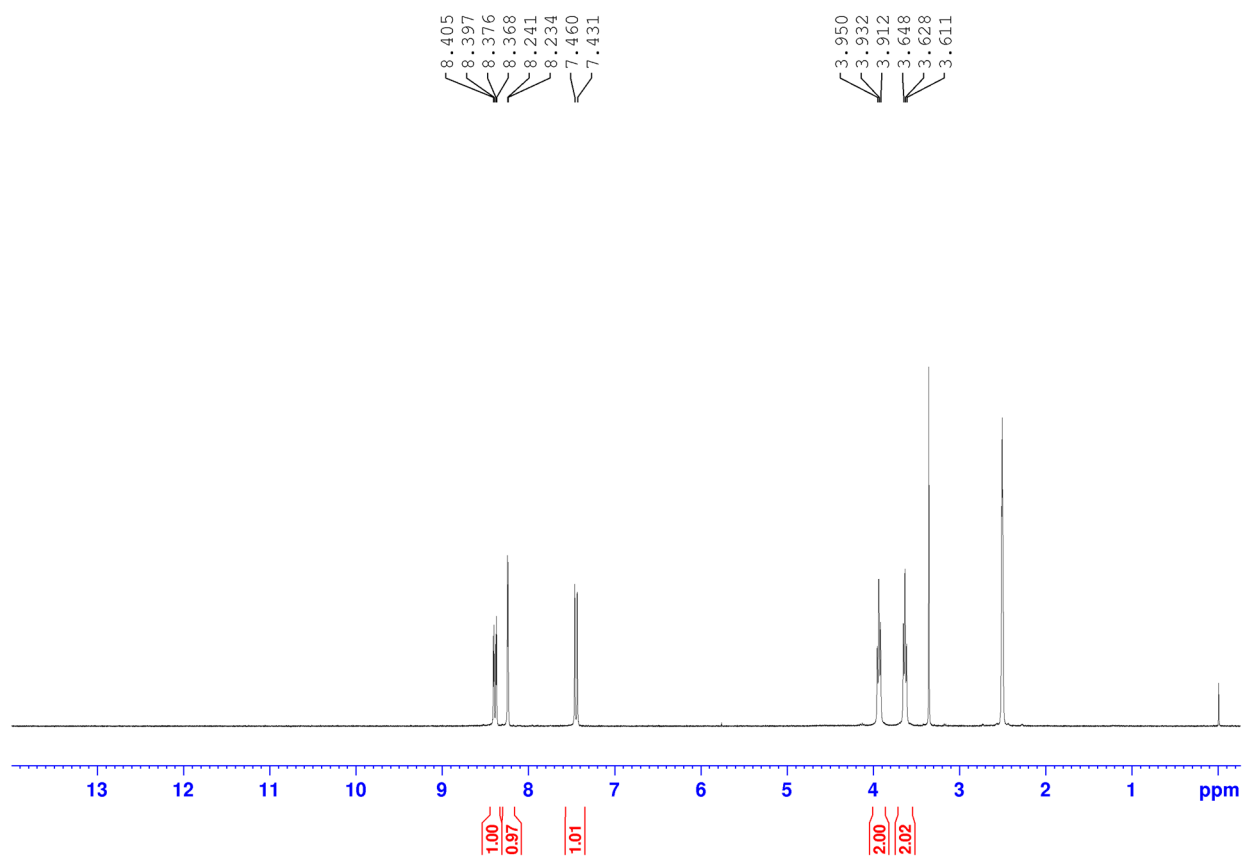

**$^{13}\text{C}$  NMR (125 MHz)**

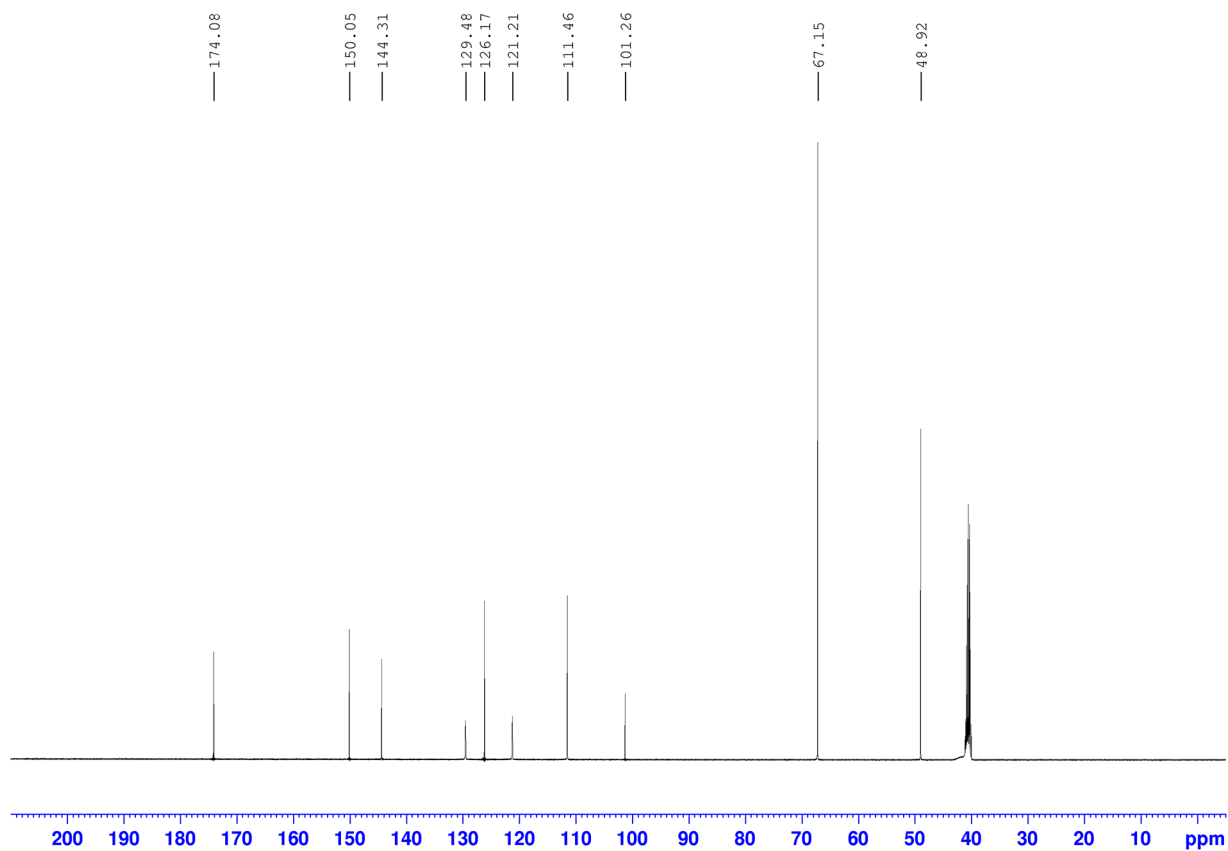

# COSY NMR (300 MHz)

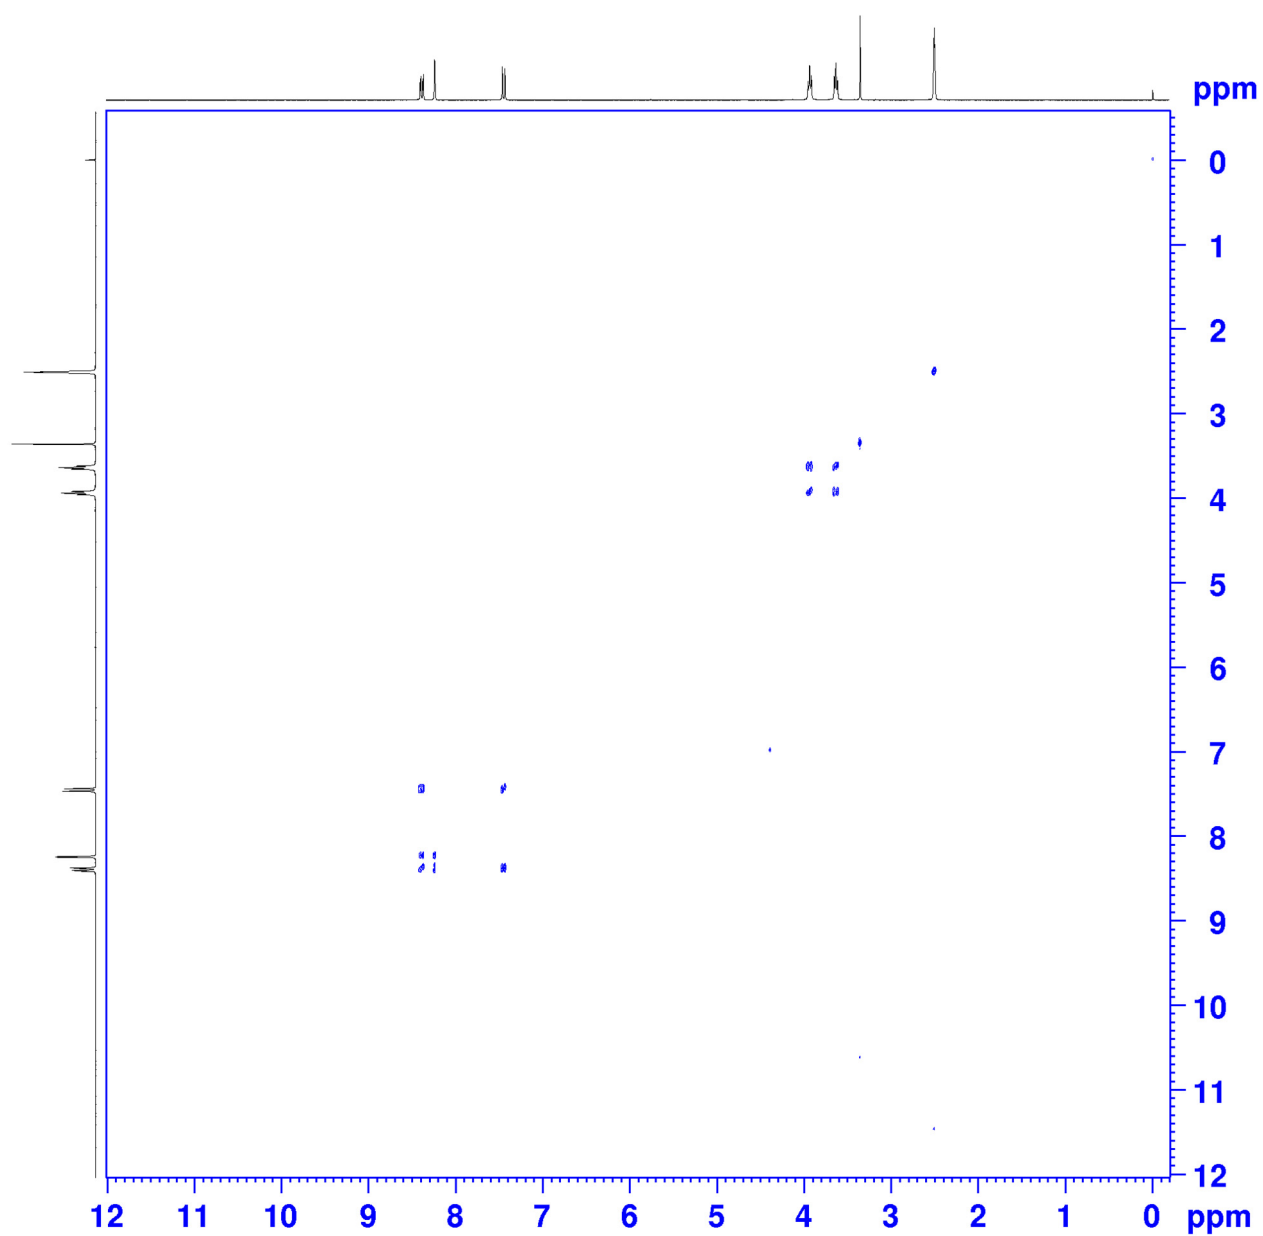

HRMS

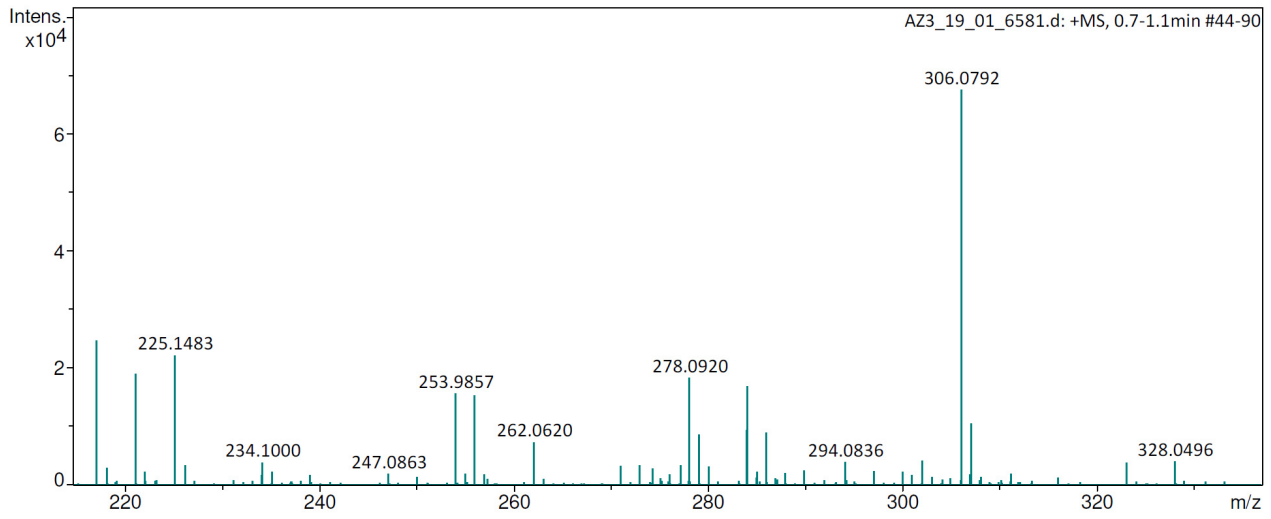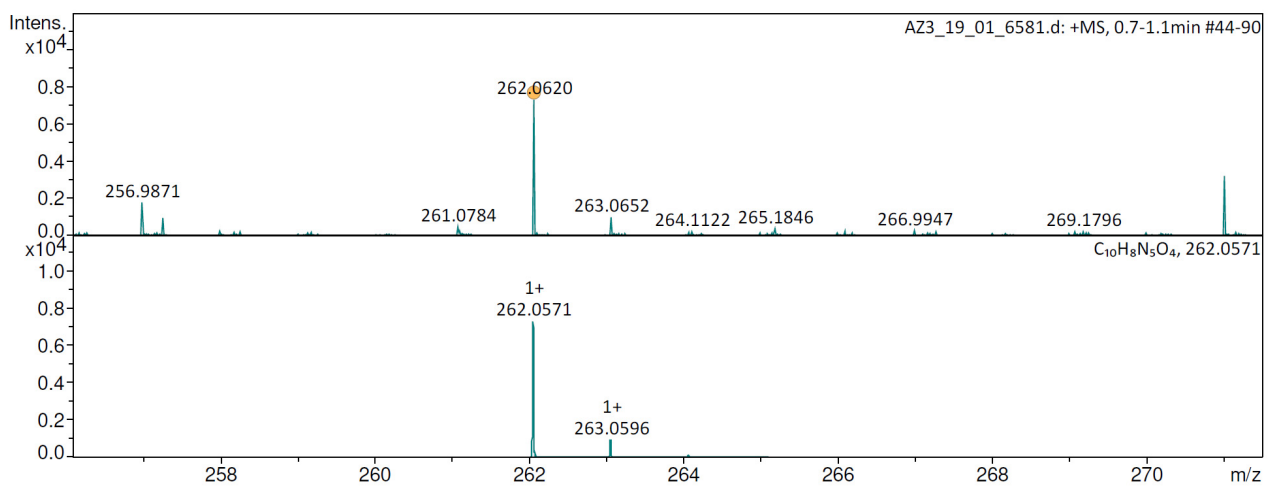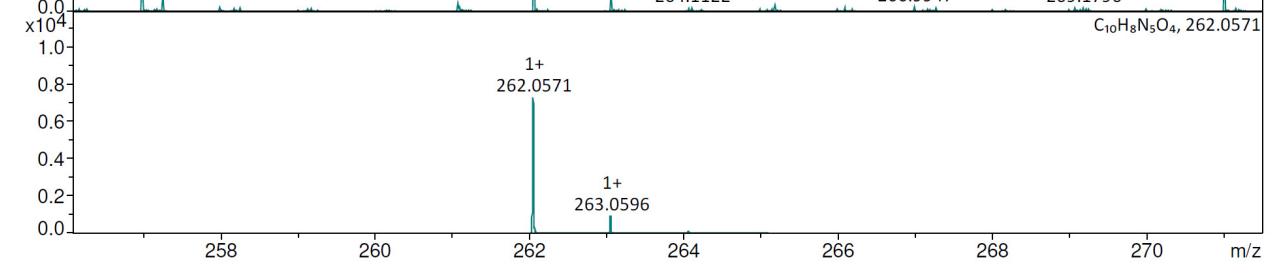

# 1-(2-Azidoethyl)-5-chloroisatin (13)

## $^1\text{H}$ NMR (300 MHz)

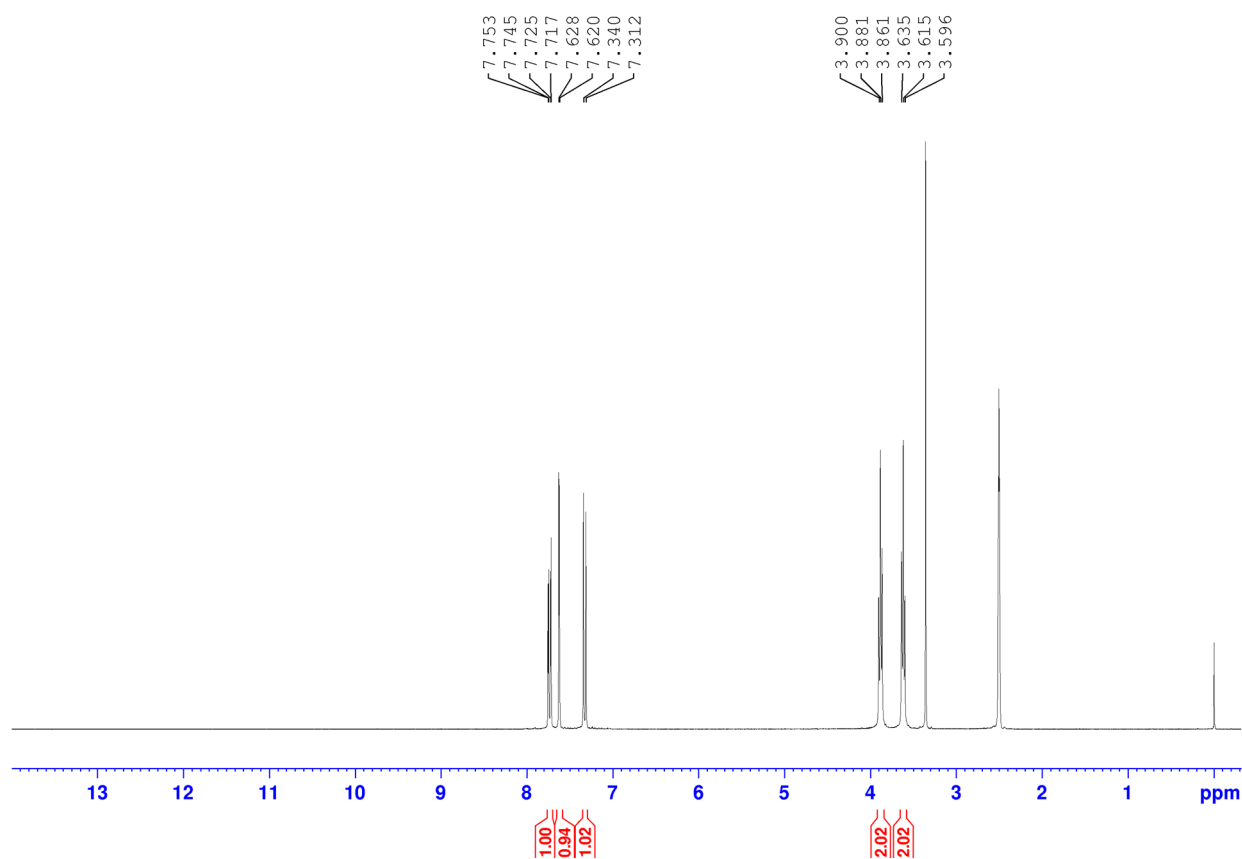

**$^{13}\text{C}$  NMR (125 MHz)**

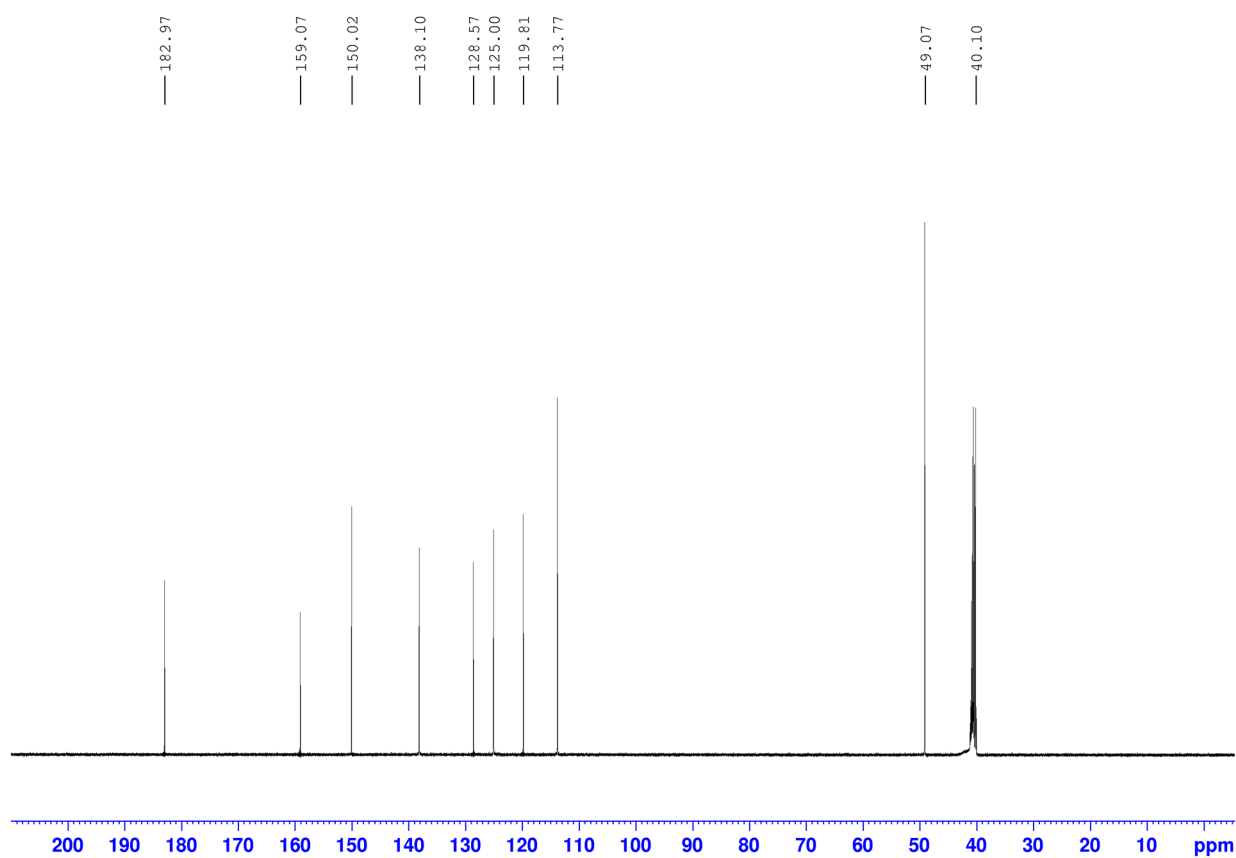

# COSY NMR (300 MHz)

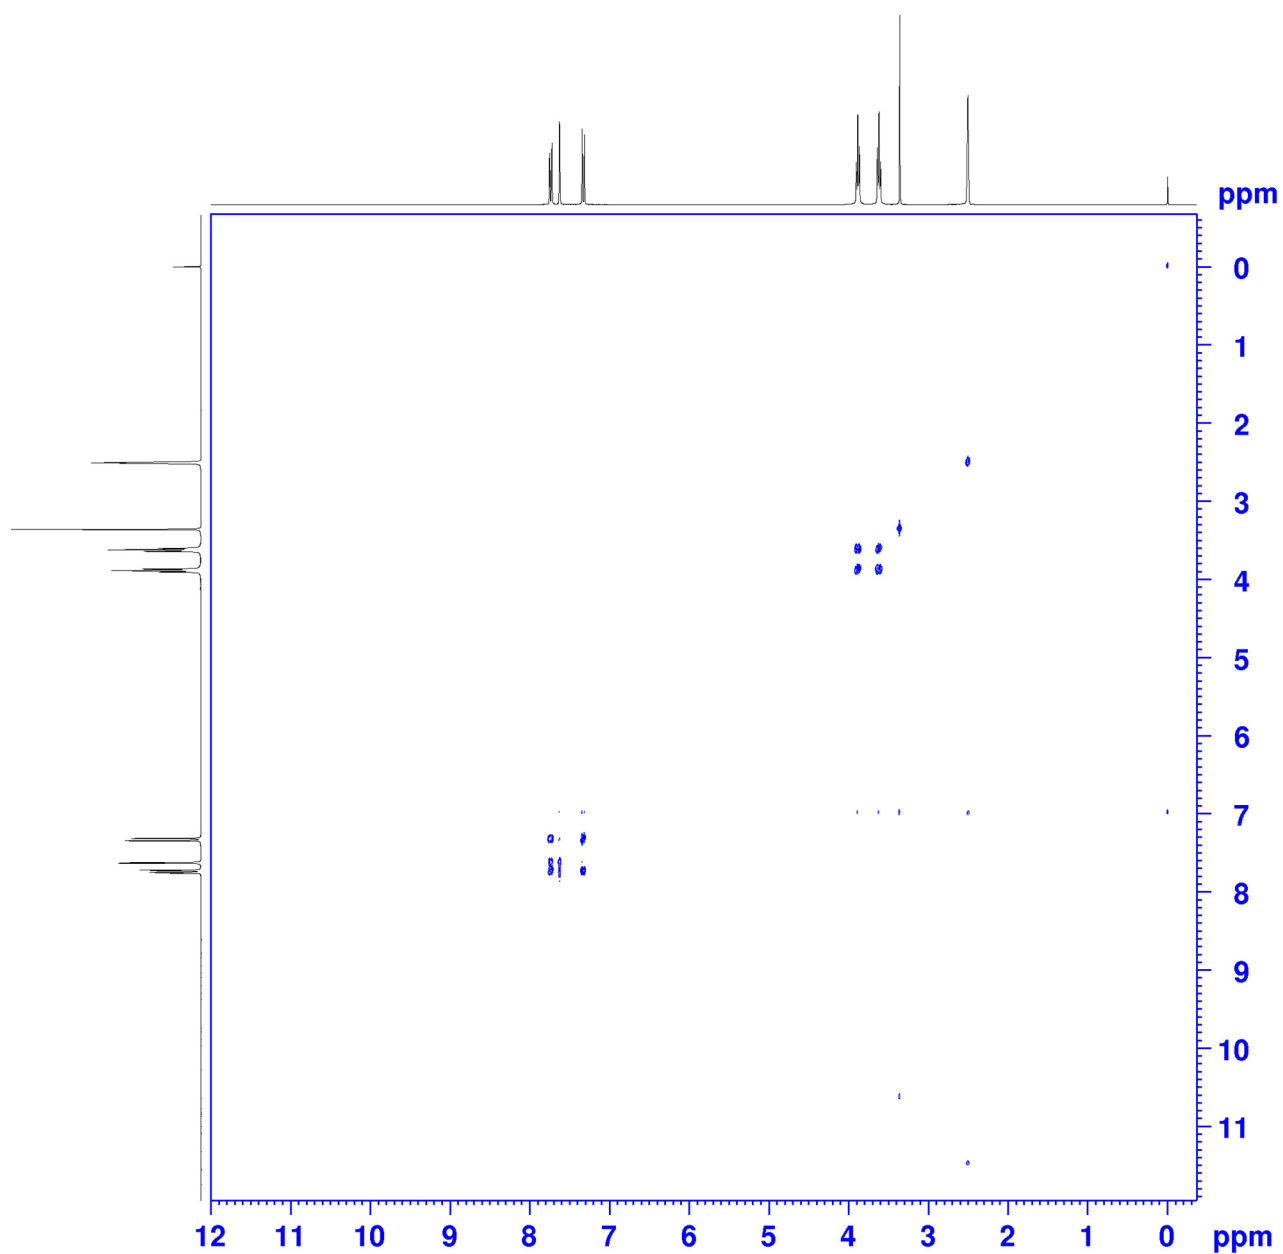



# HRMS

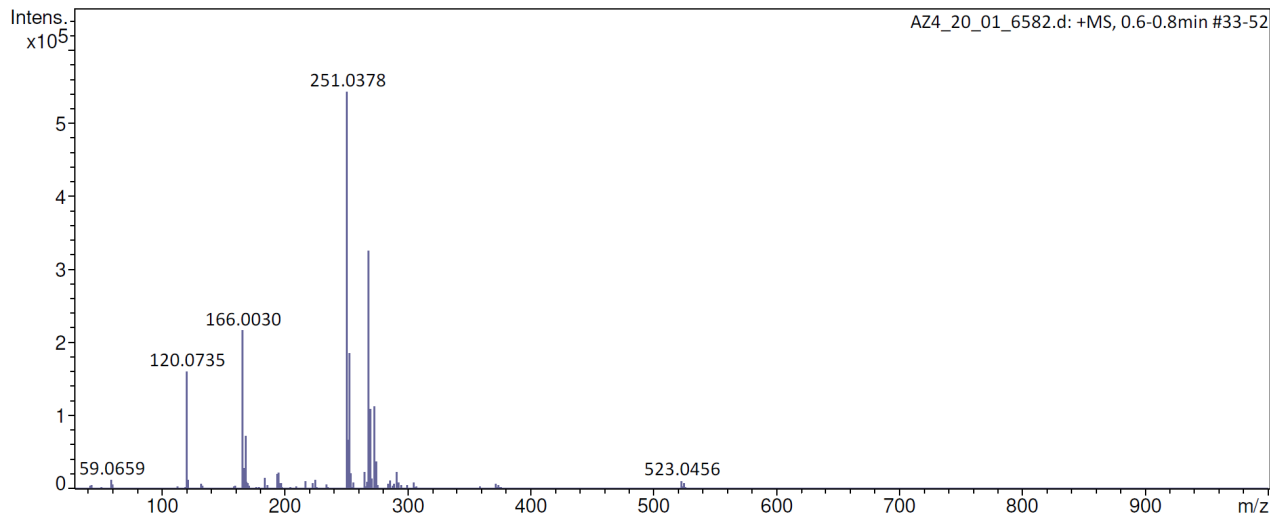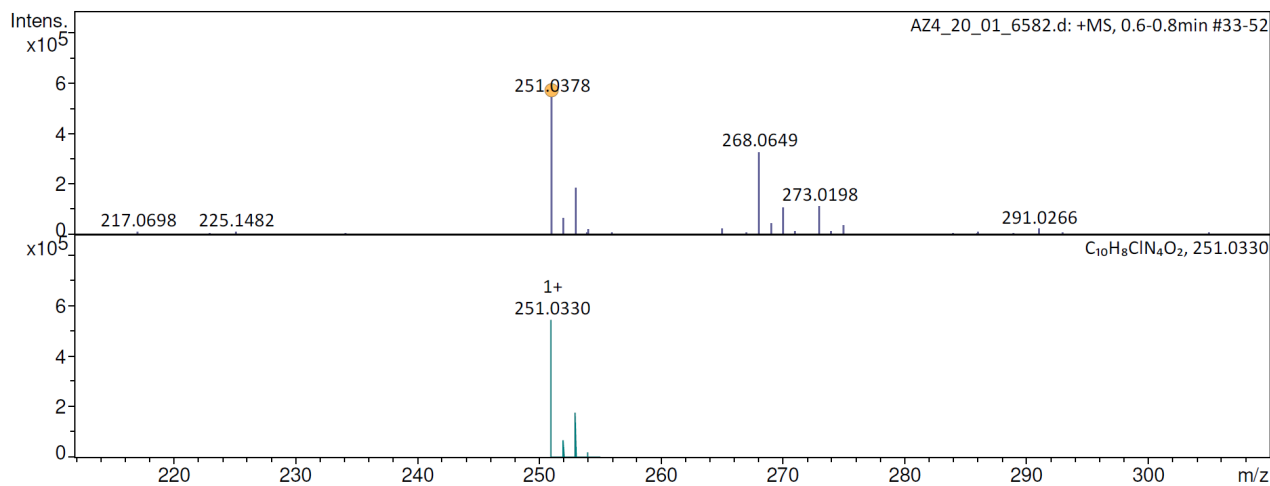

## Characterization spectra of propargyl esters 20-22.

### Propargyl 3,4,5-trihydroxybenzoate (20)

#### $^1\text{H}$ NMR (300 MHz)

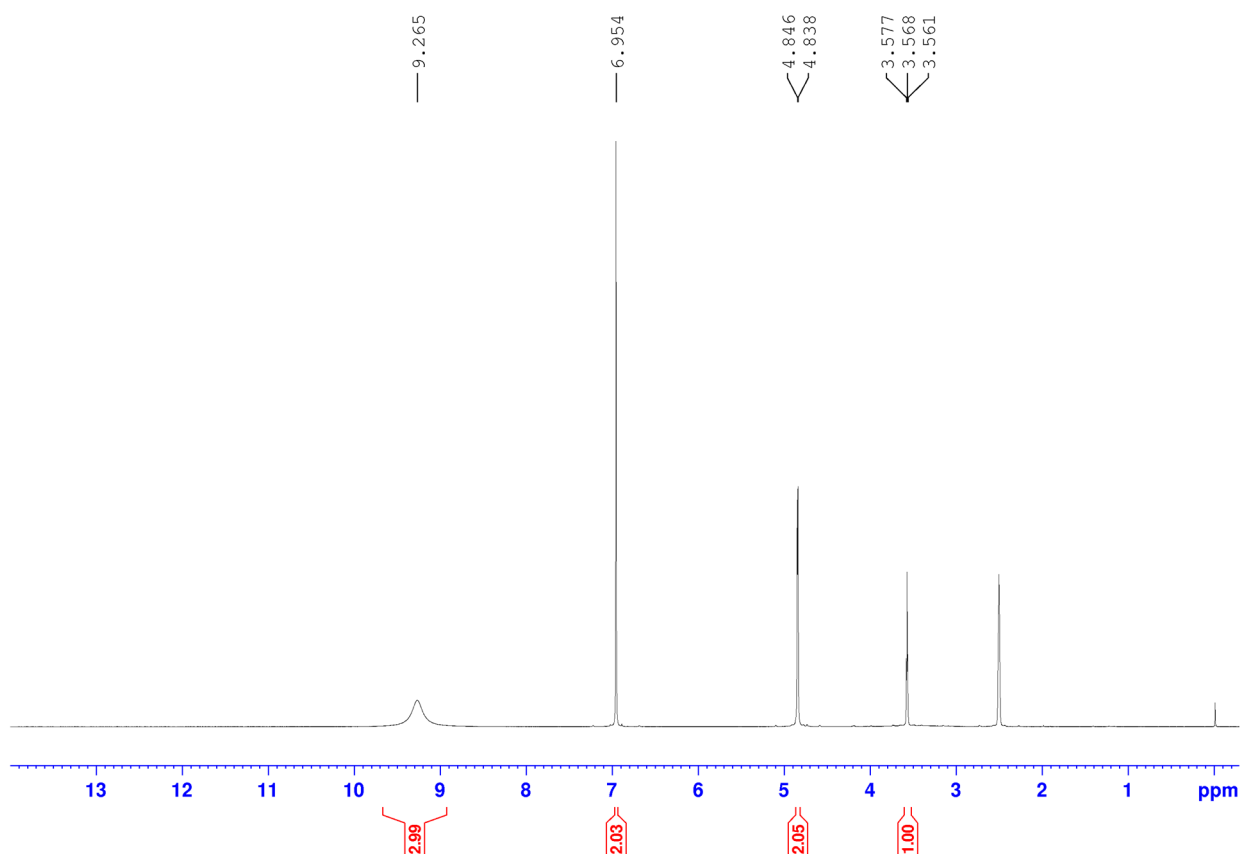

**$^{13}\text{C}$  NMR (125 MHz)**

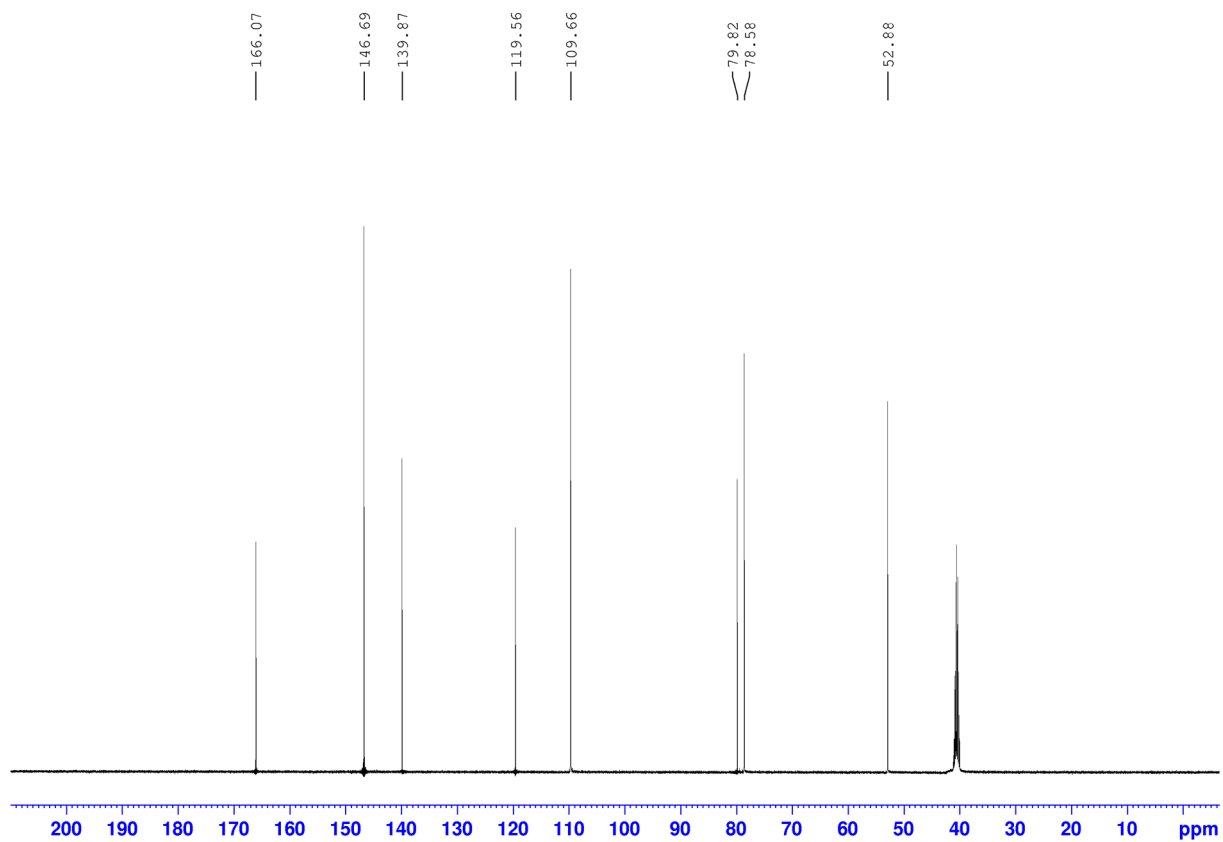

# COSY NMR (300 MHz)

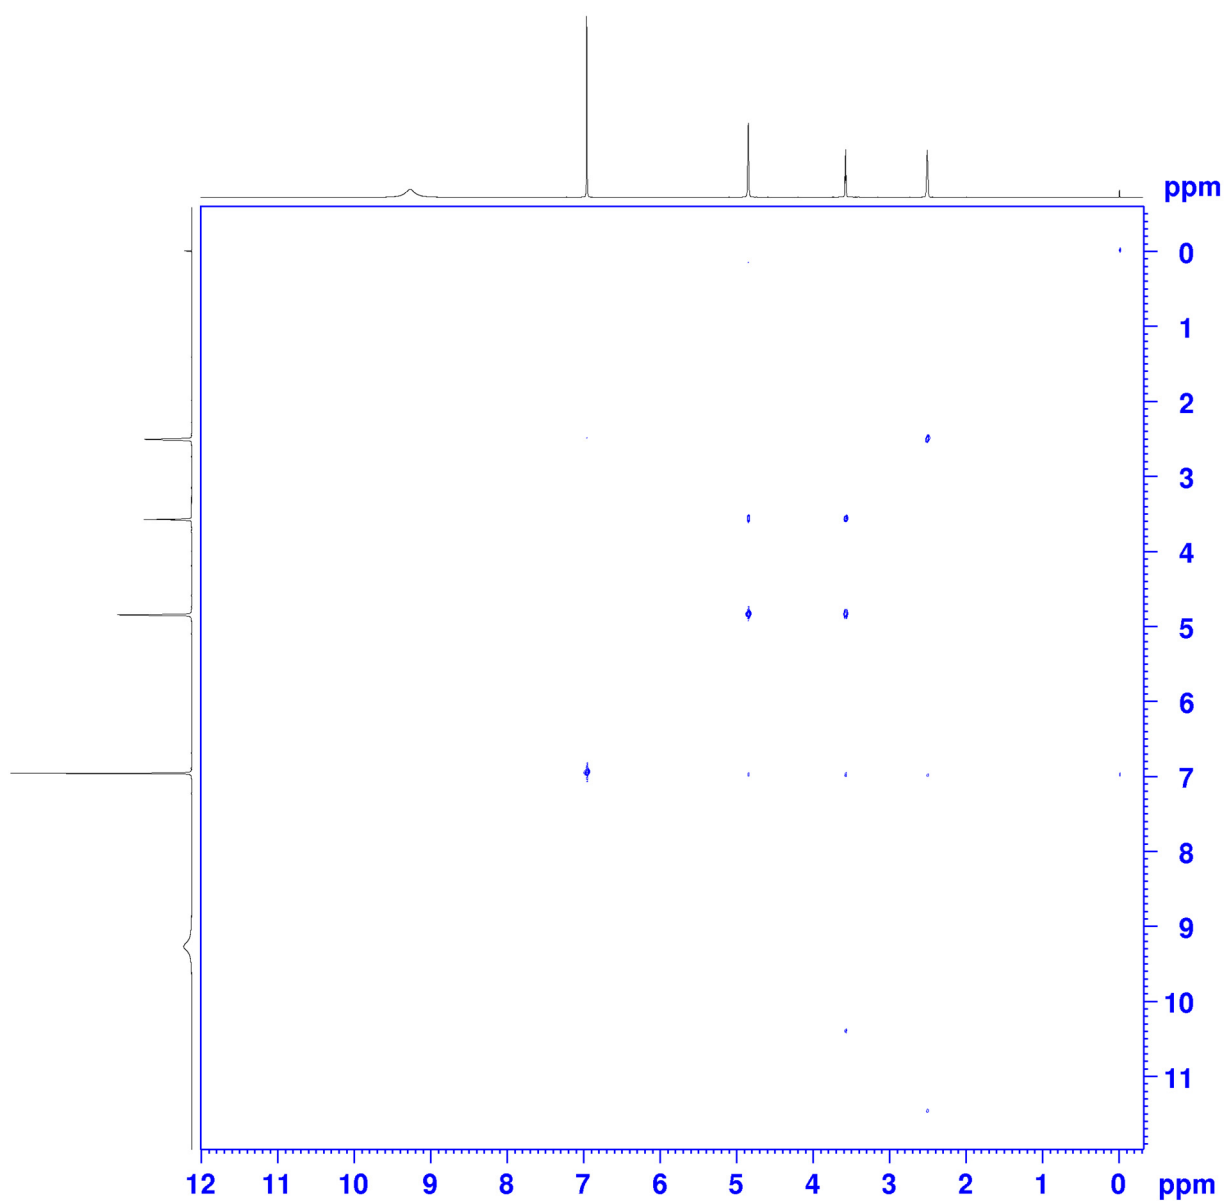

HRMS

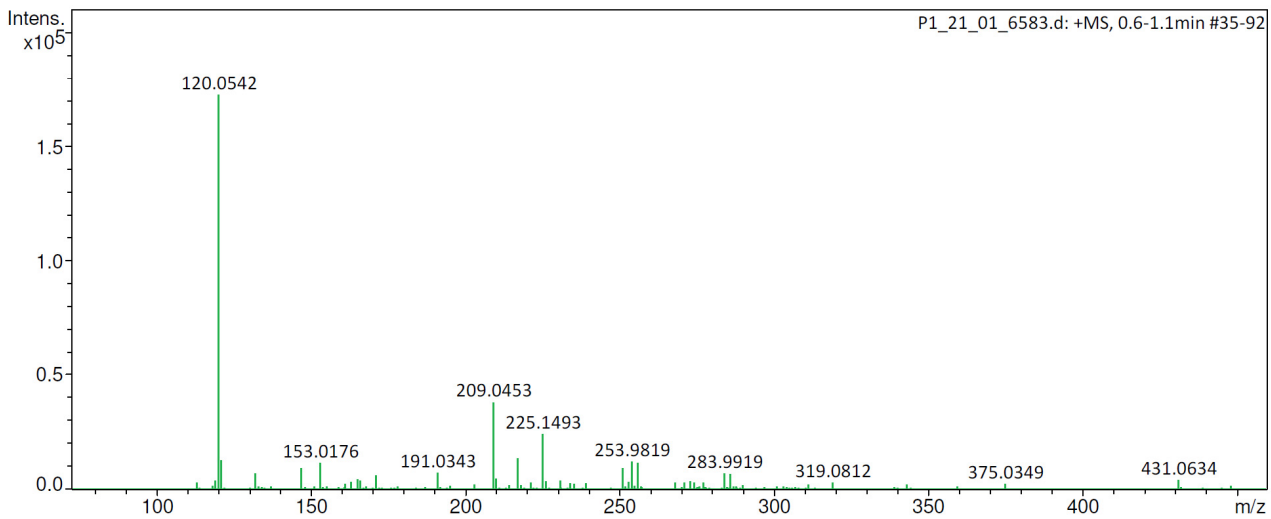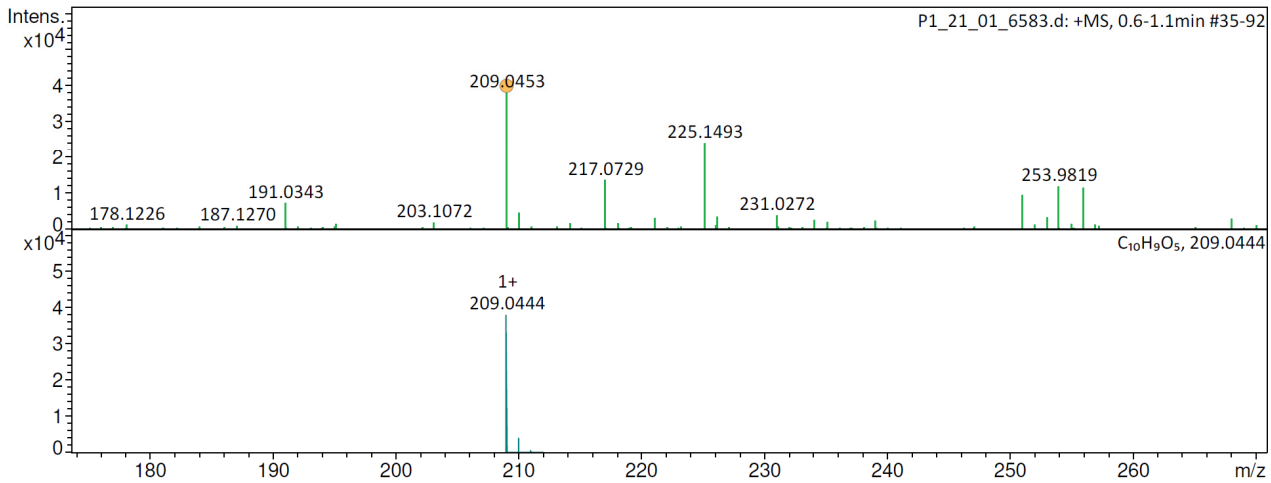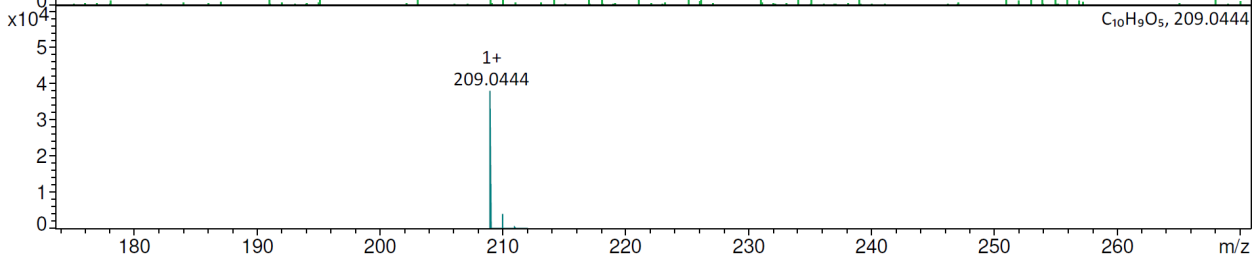

## Propargyl 4-hydroxybenzoate (21)

### $^1\text{H}$ NMR (300 MHz)

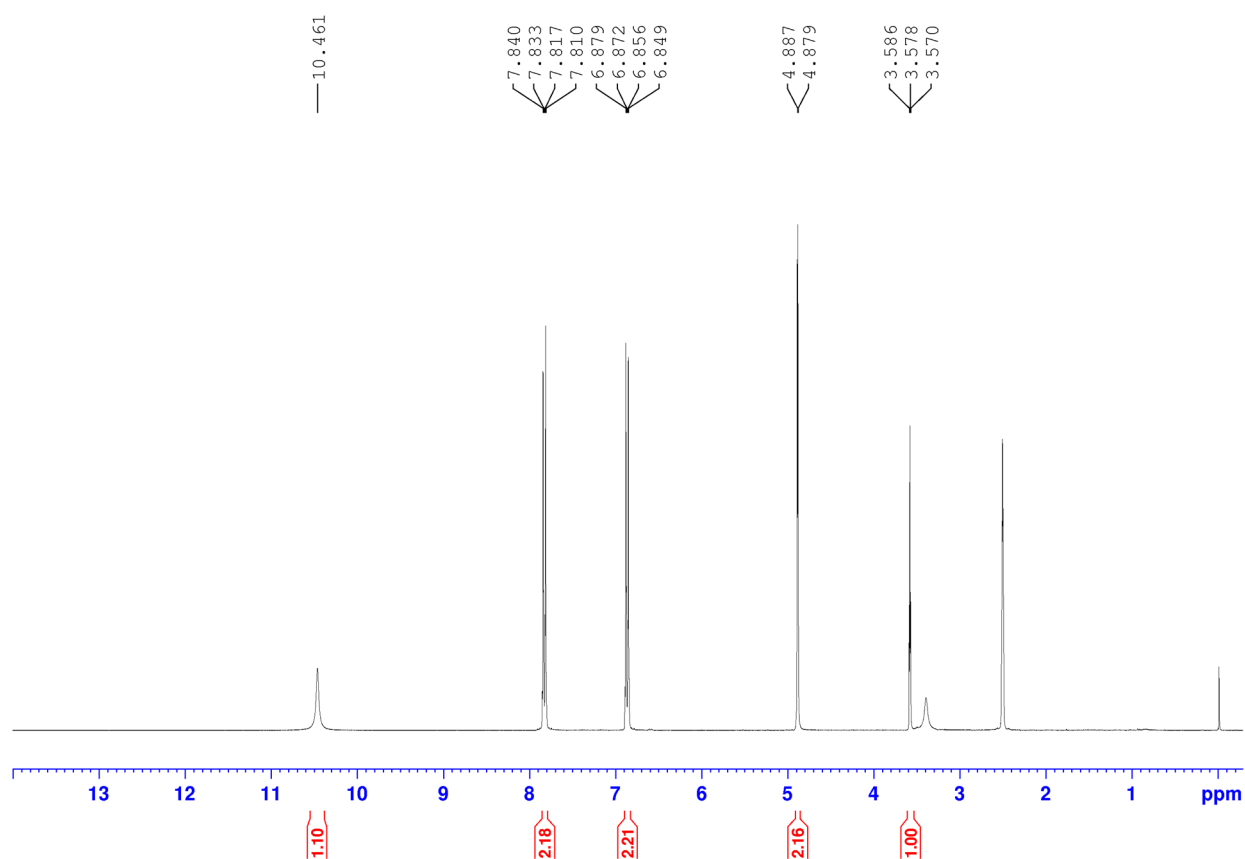

**$^{13}\text{C}$  NMR (125 MHz)**

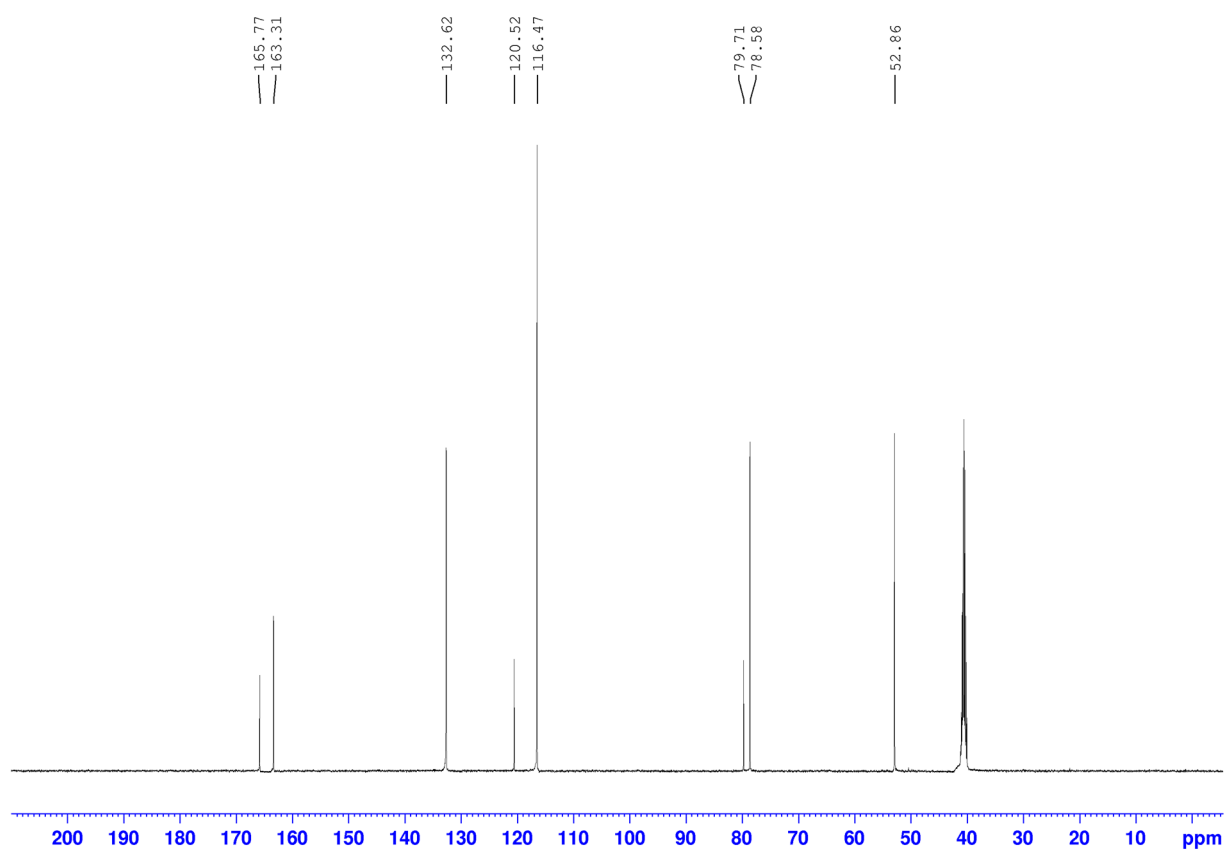

## COSY NMR (300 MHz)

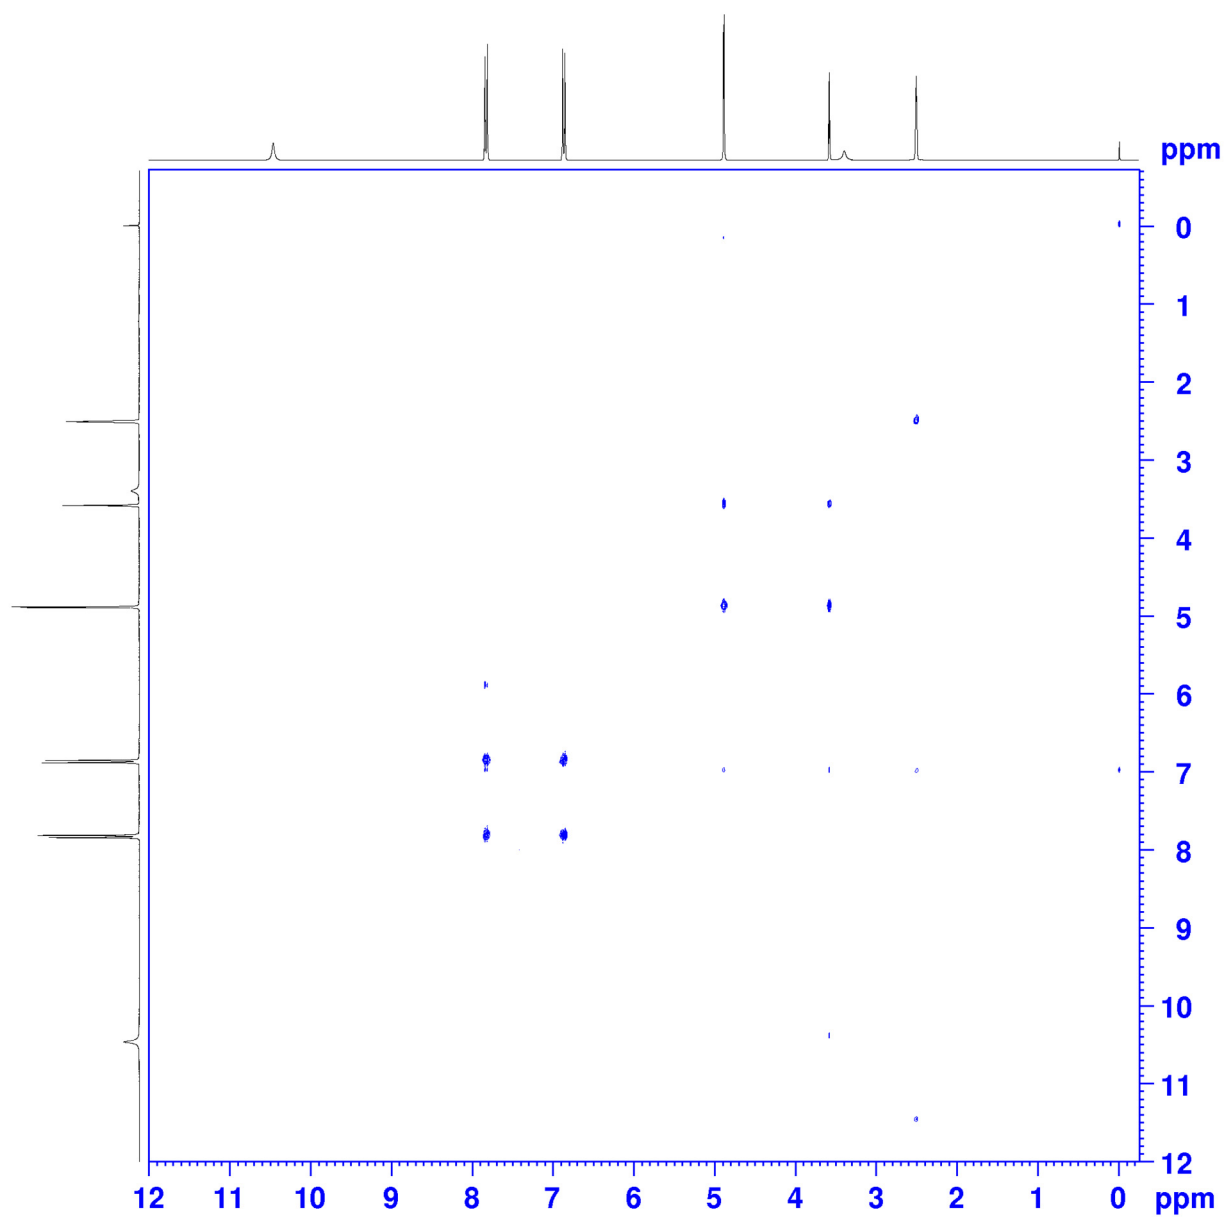



# HRMS

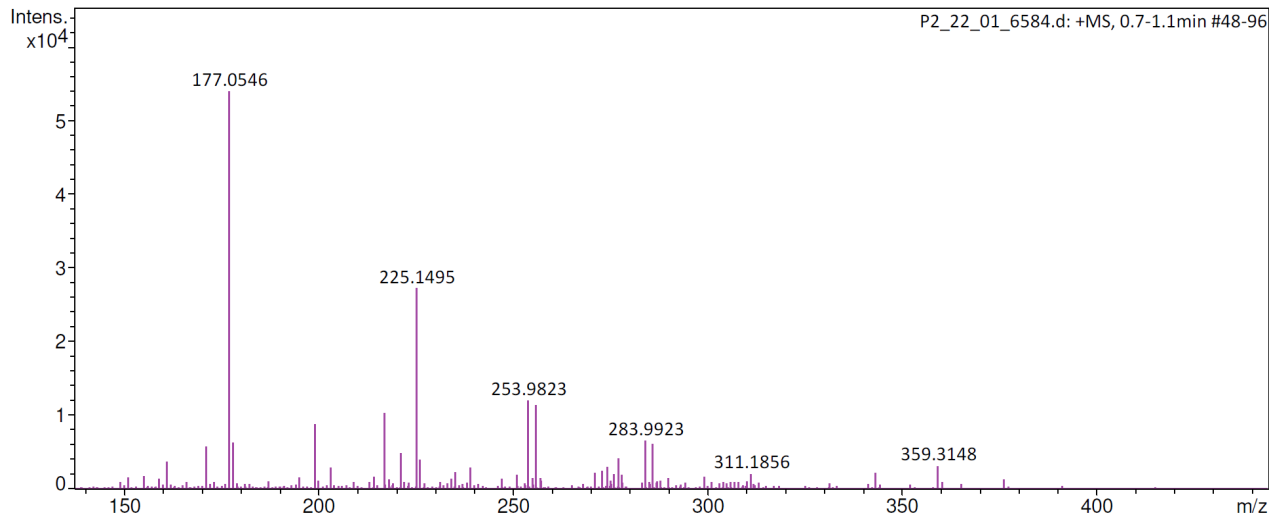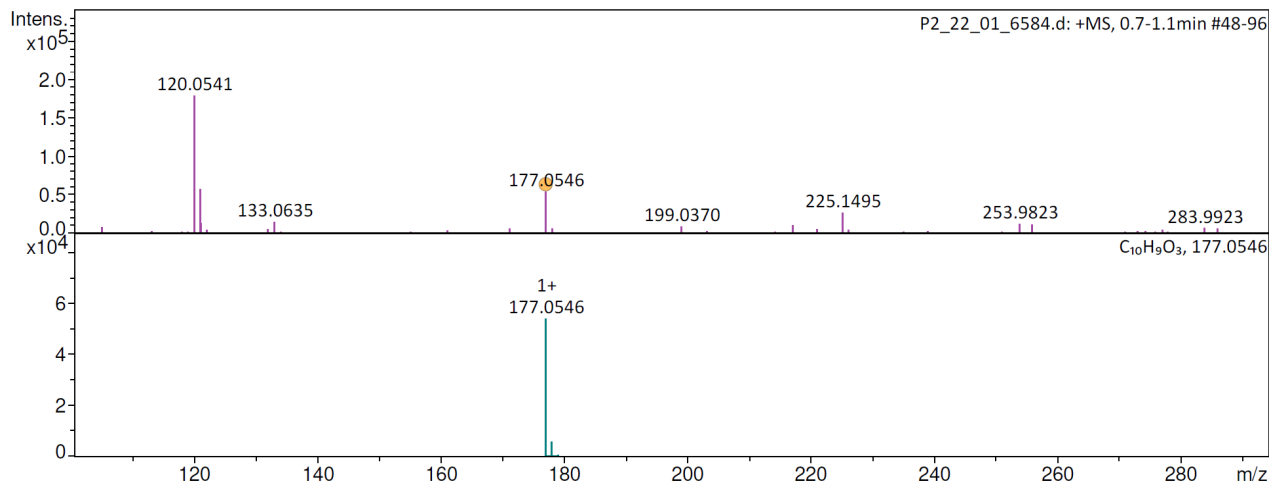

## Propargyl (*E*)-3-(3,4-dihydroxyphenyl)acrylate (22)

### $^1\text{H}$ NMR (300 MHz)

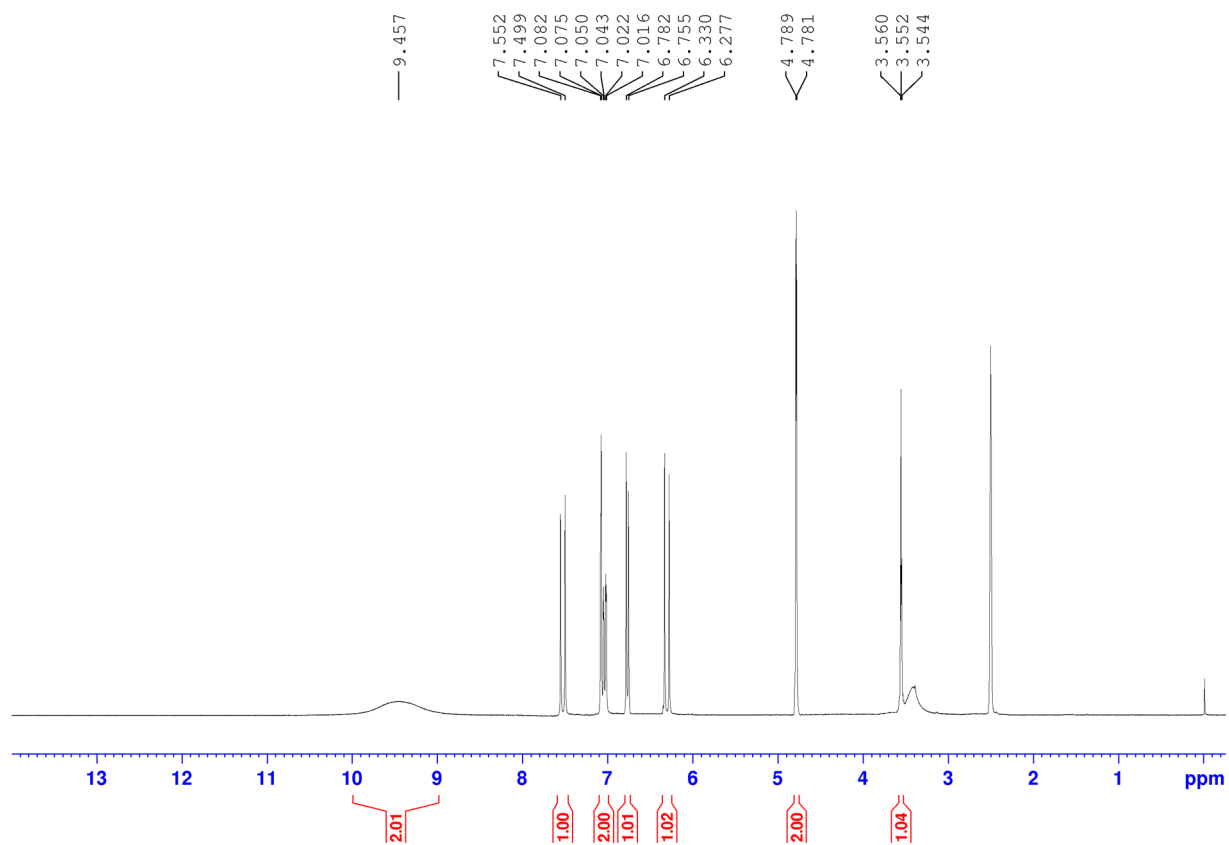

**$^{13}\text{C}$  NMR (125 MHz)**

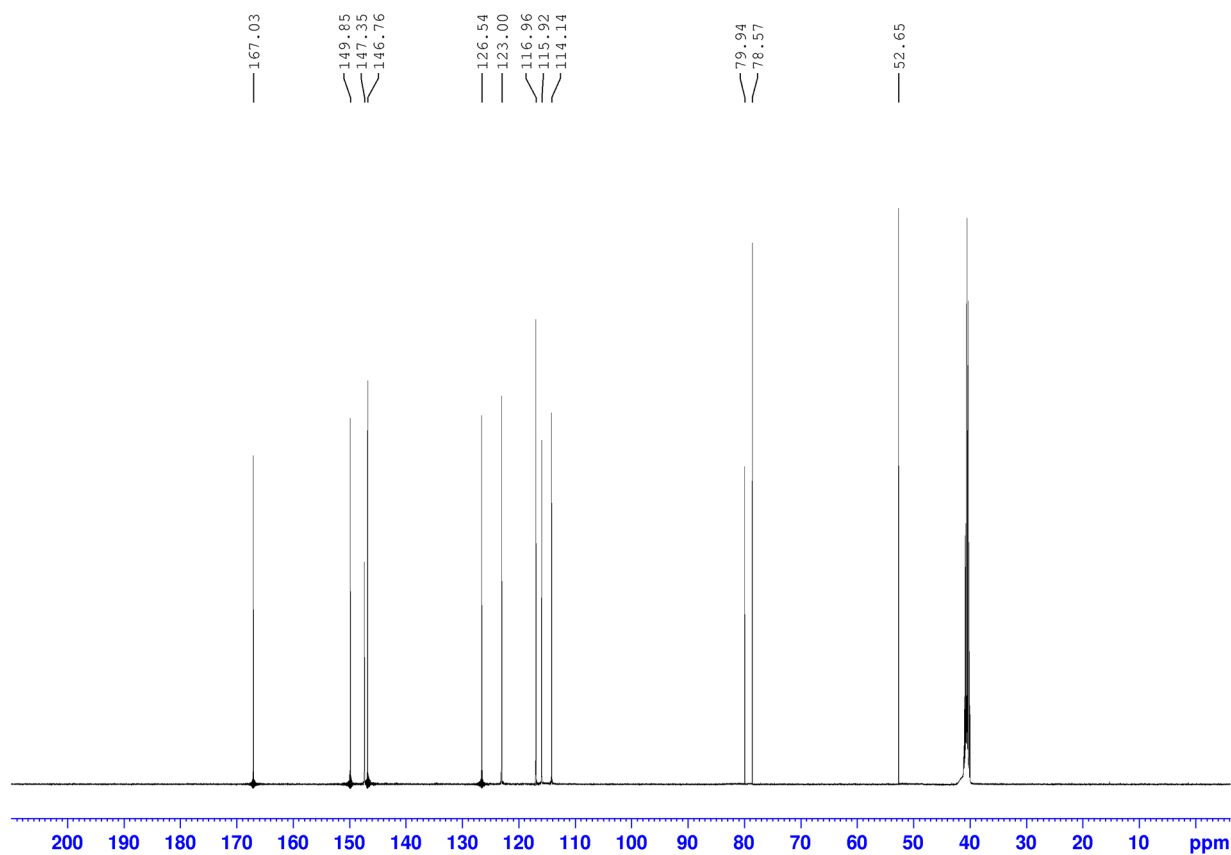

# COSY NMR (300 MHz)

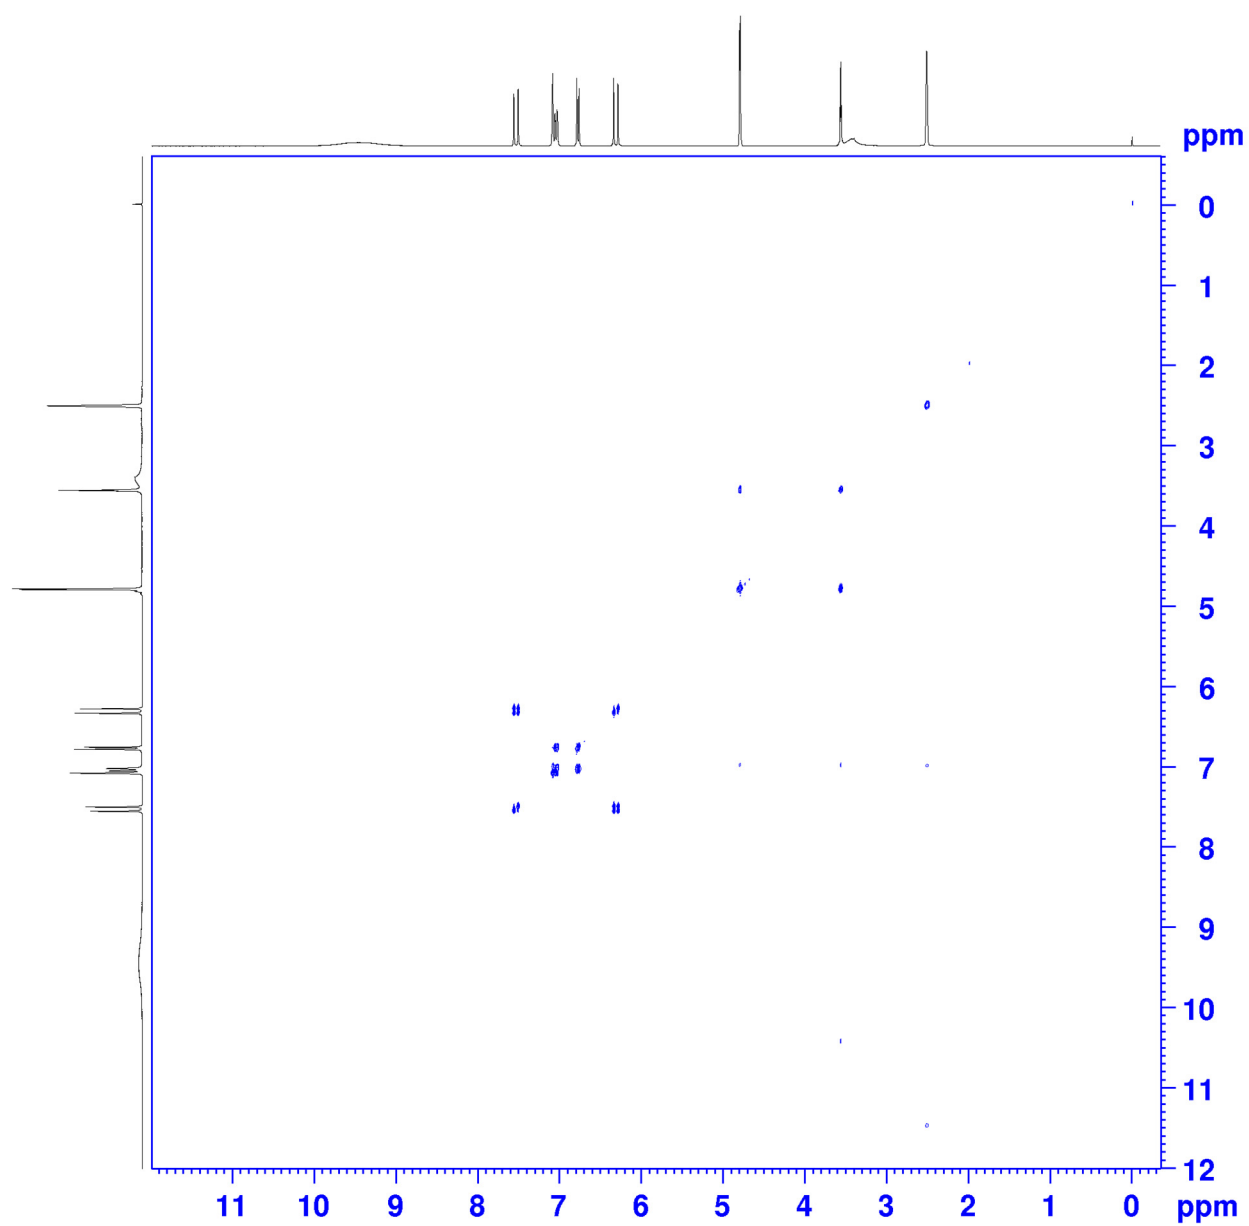

# HRMS

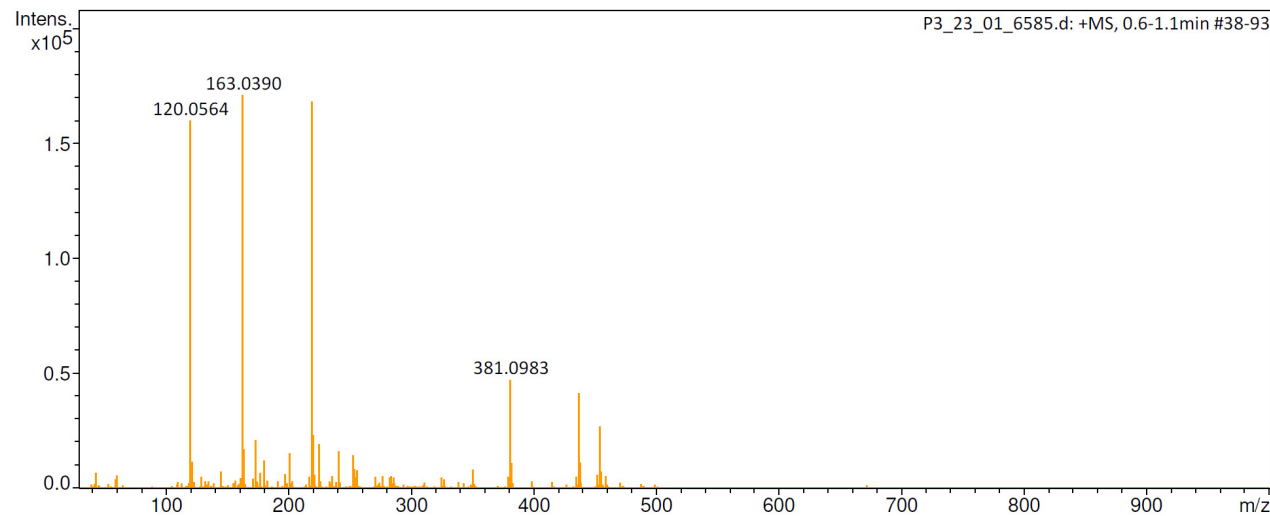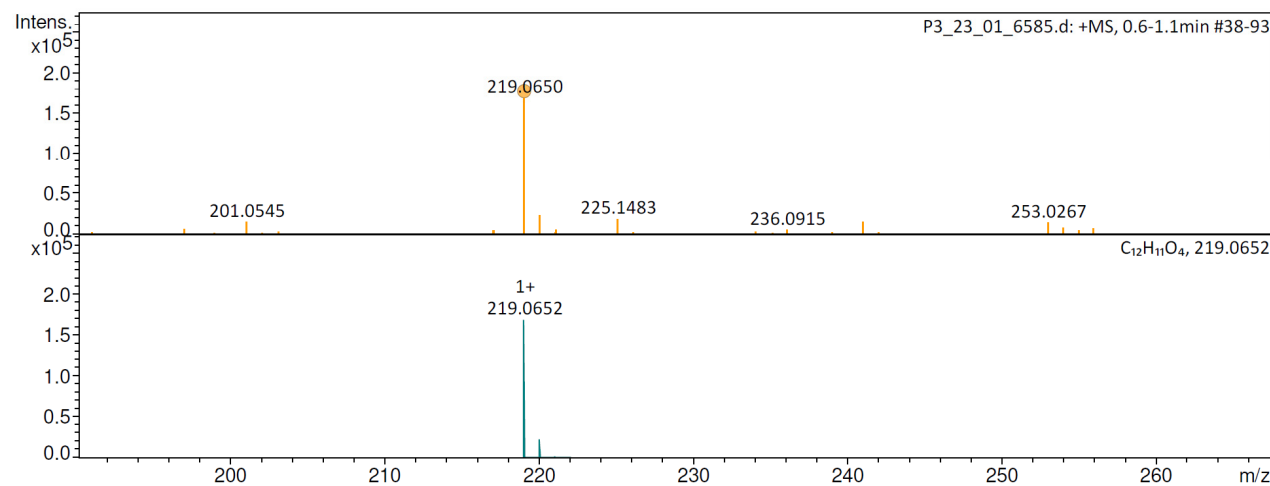

## <sup>1</sup>H NMR (300 MHz) spectra of crude of the model reaction for synthesis of 23

- Optimized reaction conditions

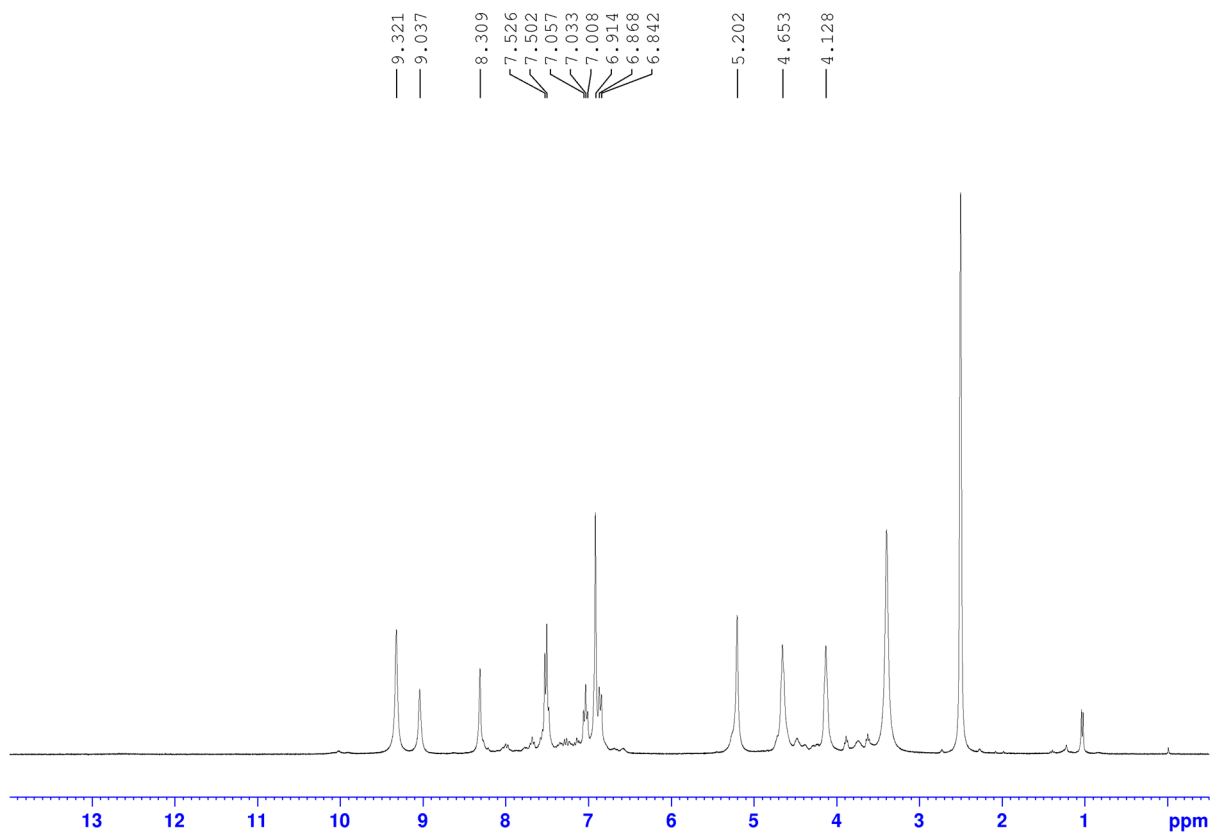

- Gram-Scale reaction

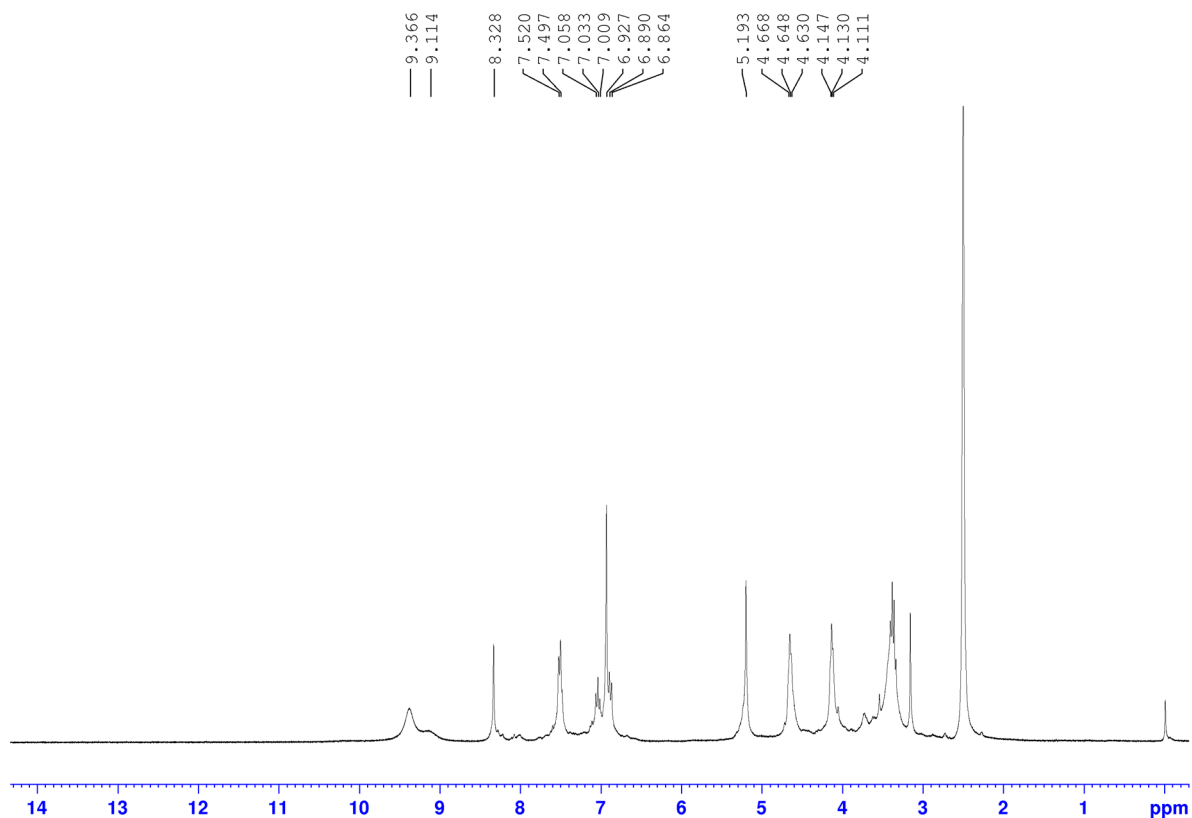

## Characterization spectra of hybrid molecules 23-34

### (1-(2-(isatin-1-yl)ethyl)-1,2,3-triazol-4-yl)methyl 3,4,5-trihydroxybenzoate (23)

#### $^1\text{H}$ NMR (300 MHz)

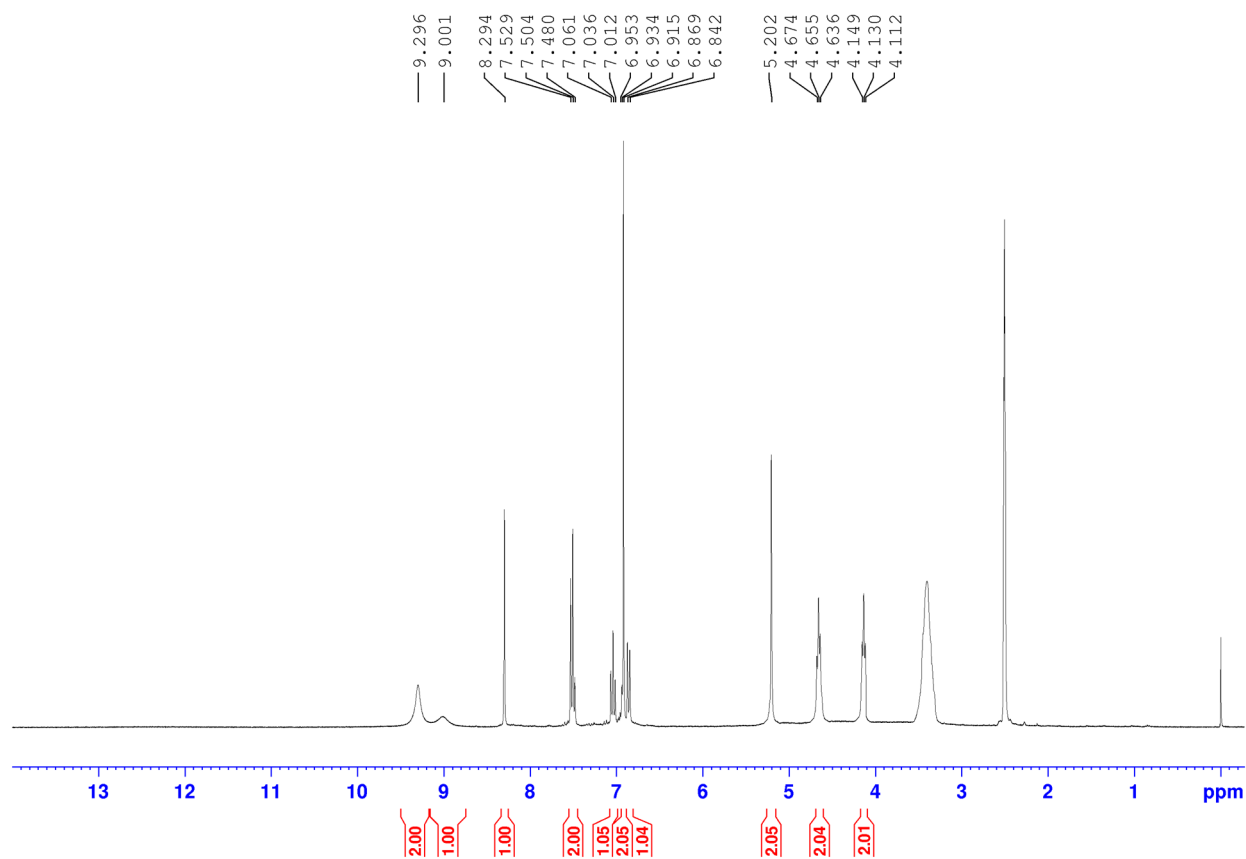

**$^{13}\text{C}$  NMR (125 MHz)**

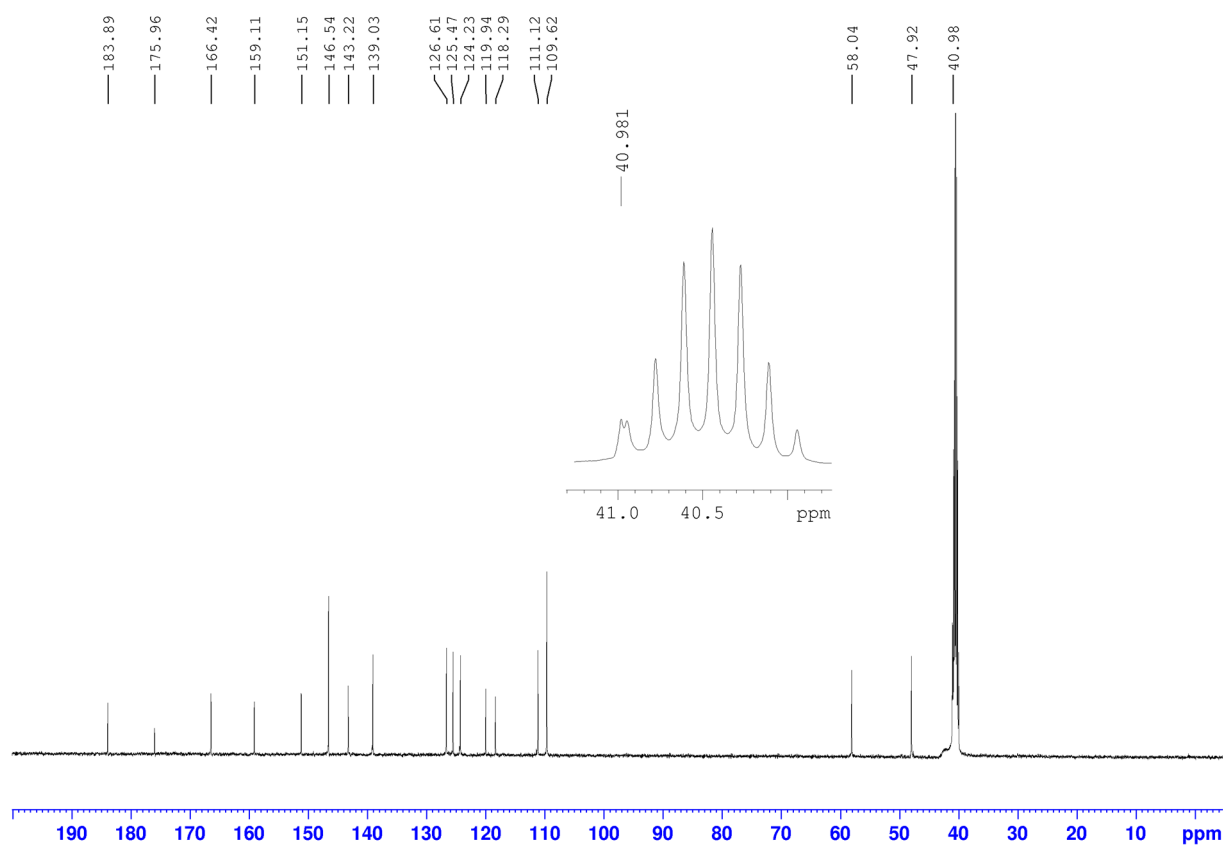



# COSY NMR (300 MHz)

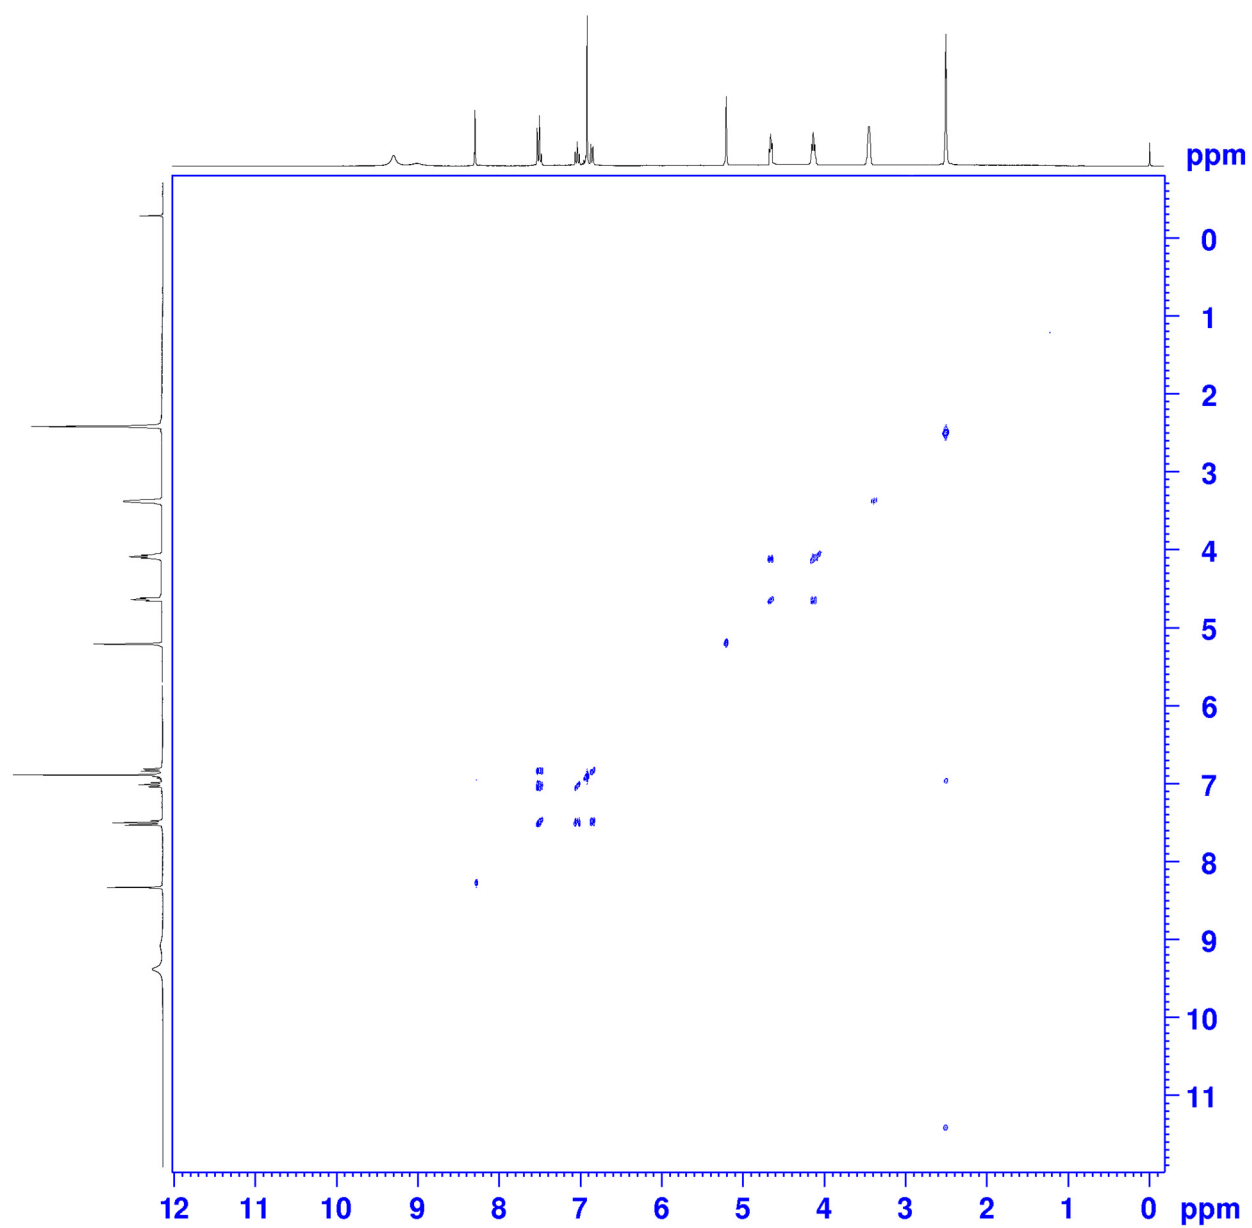

HRMS

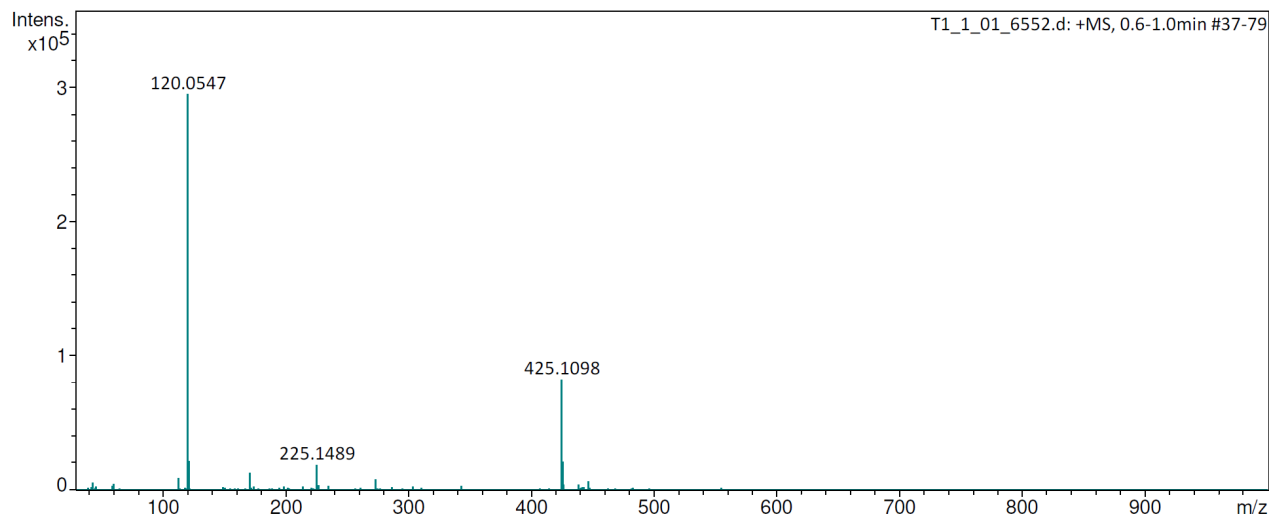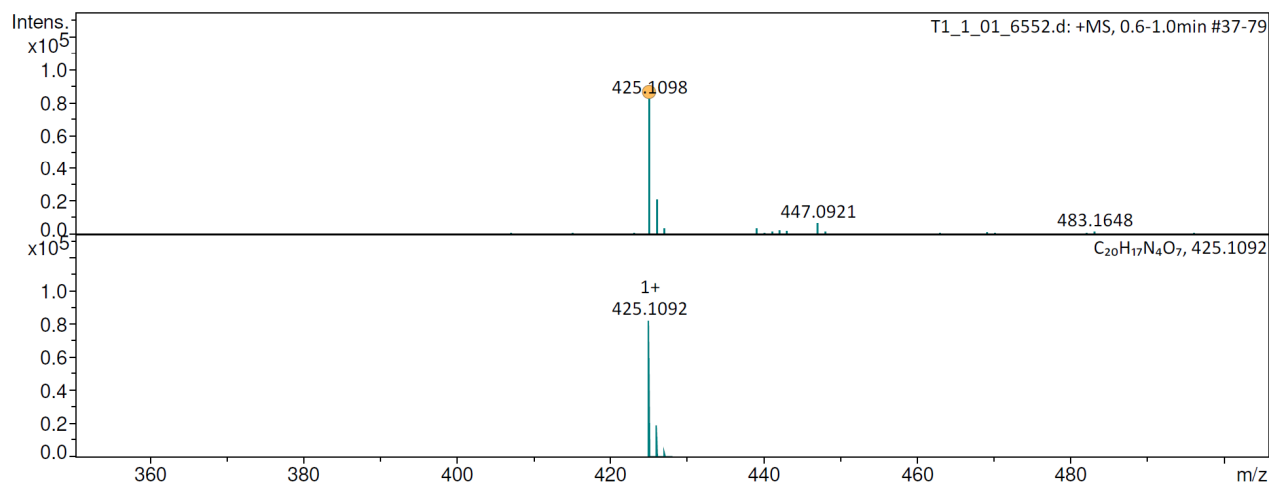

**(1-(2-(5-methoxy-isatin-1-yl)ethyl)-1,2,3-triazol-4-yl)methyl 3,4,5-trihydroxybenzoate (24)**

**<sup>1</sup>H NMR (300 MHz)**

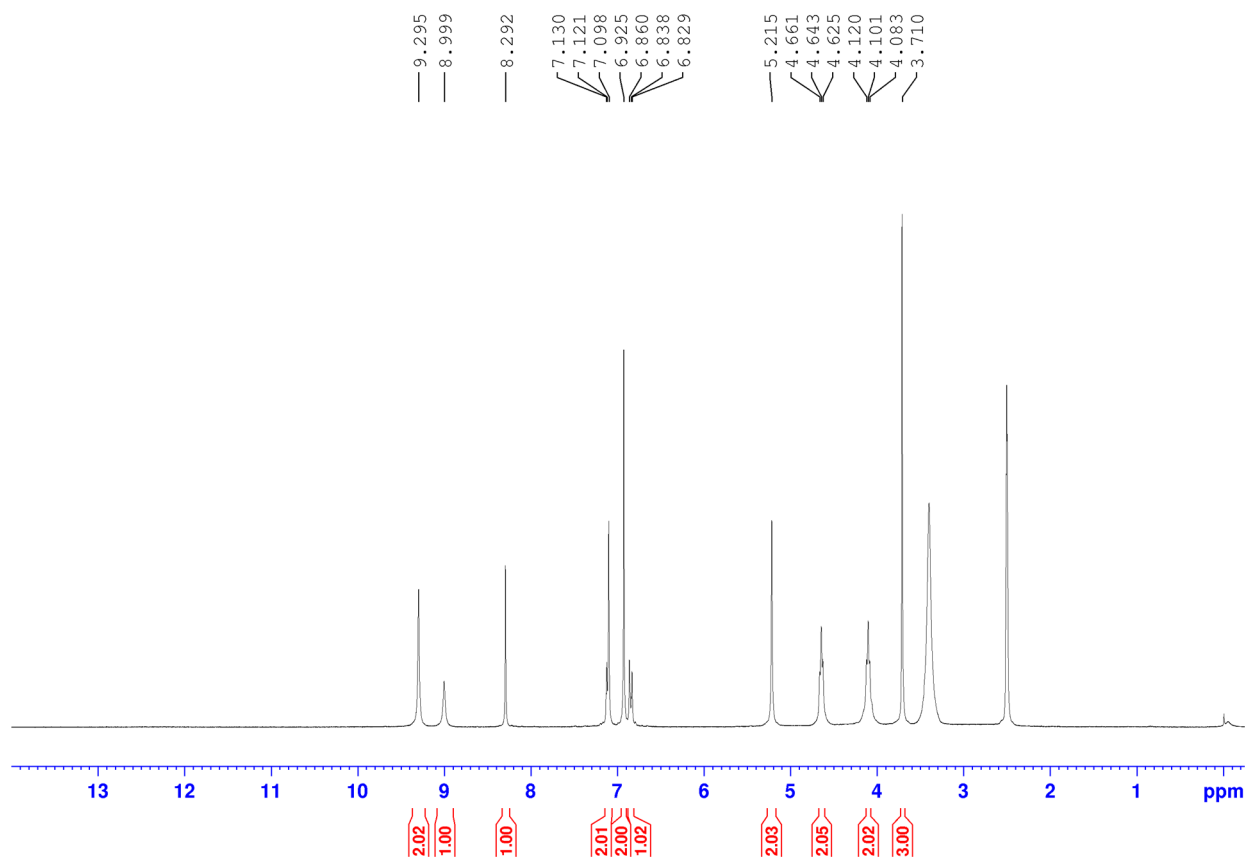

**$^{13}\text{C}$  NMR (125 MHz)**

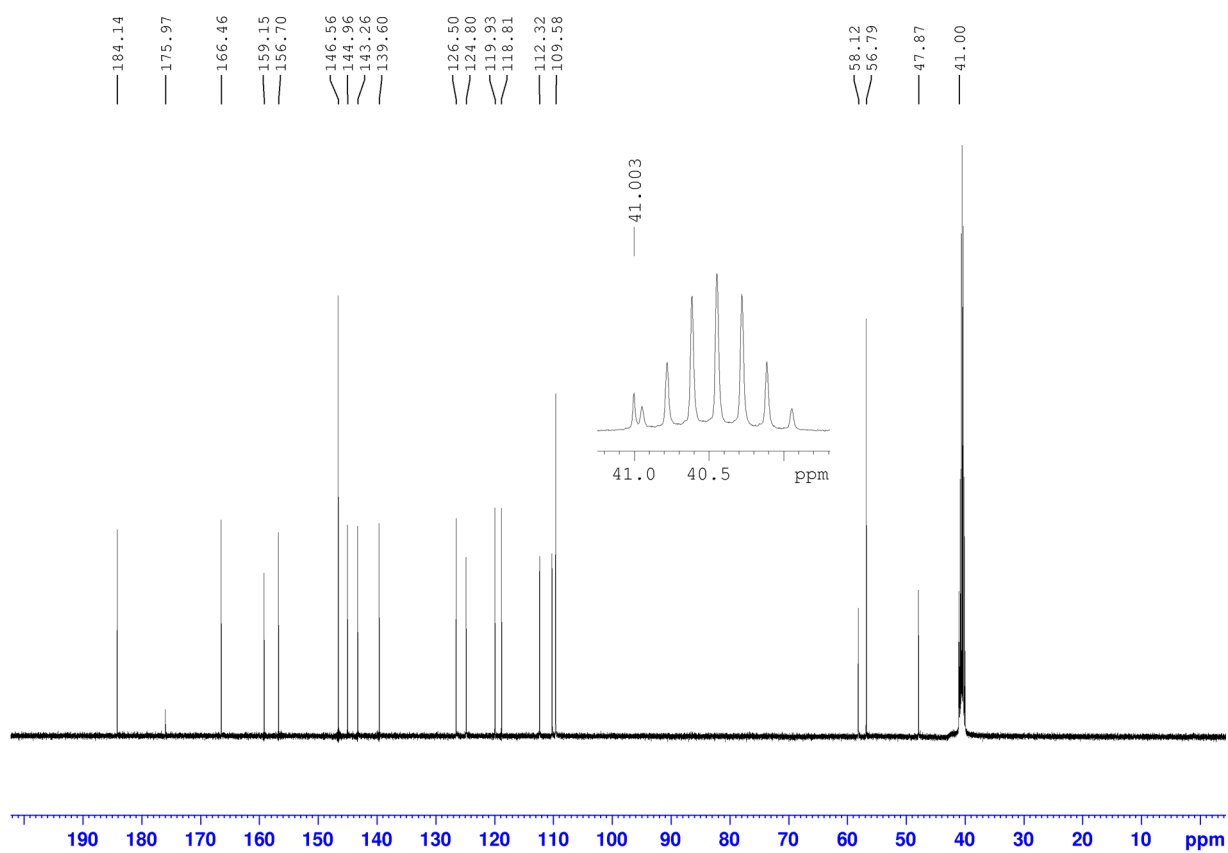

# COSY NMR (300 MHz)

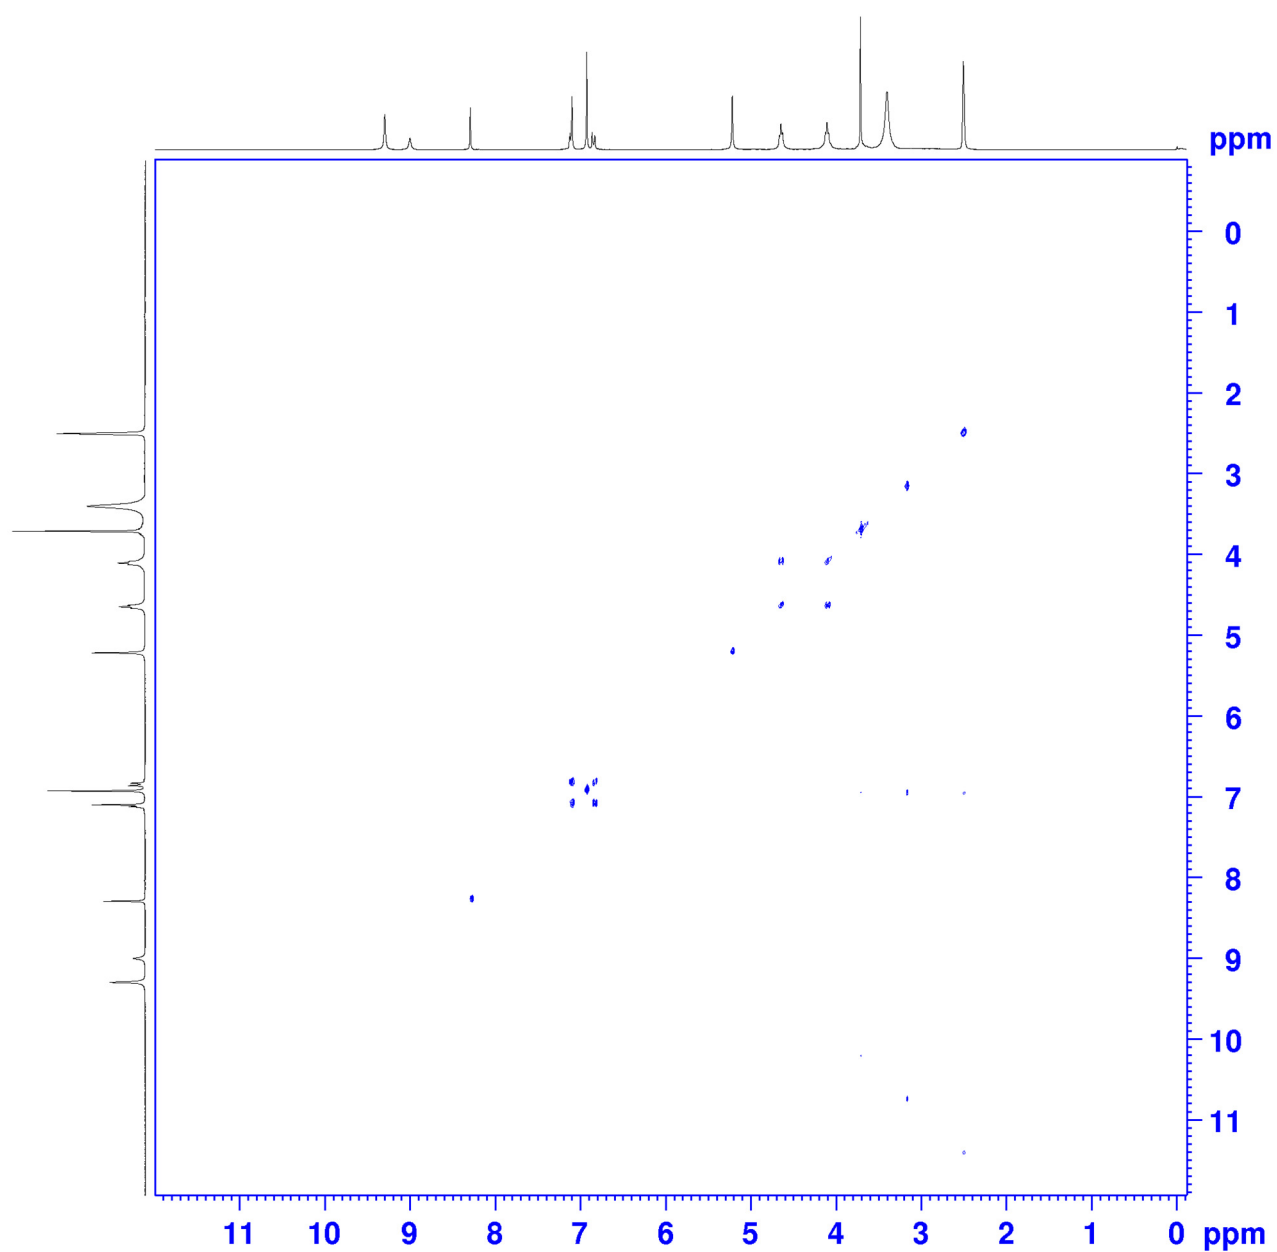

HRMS

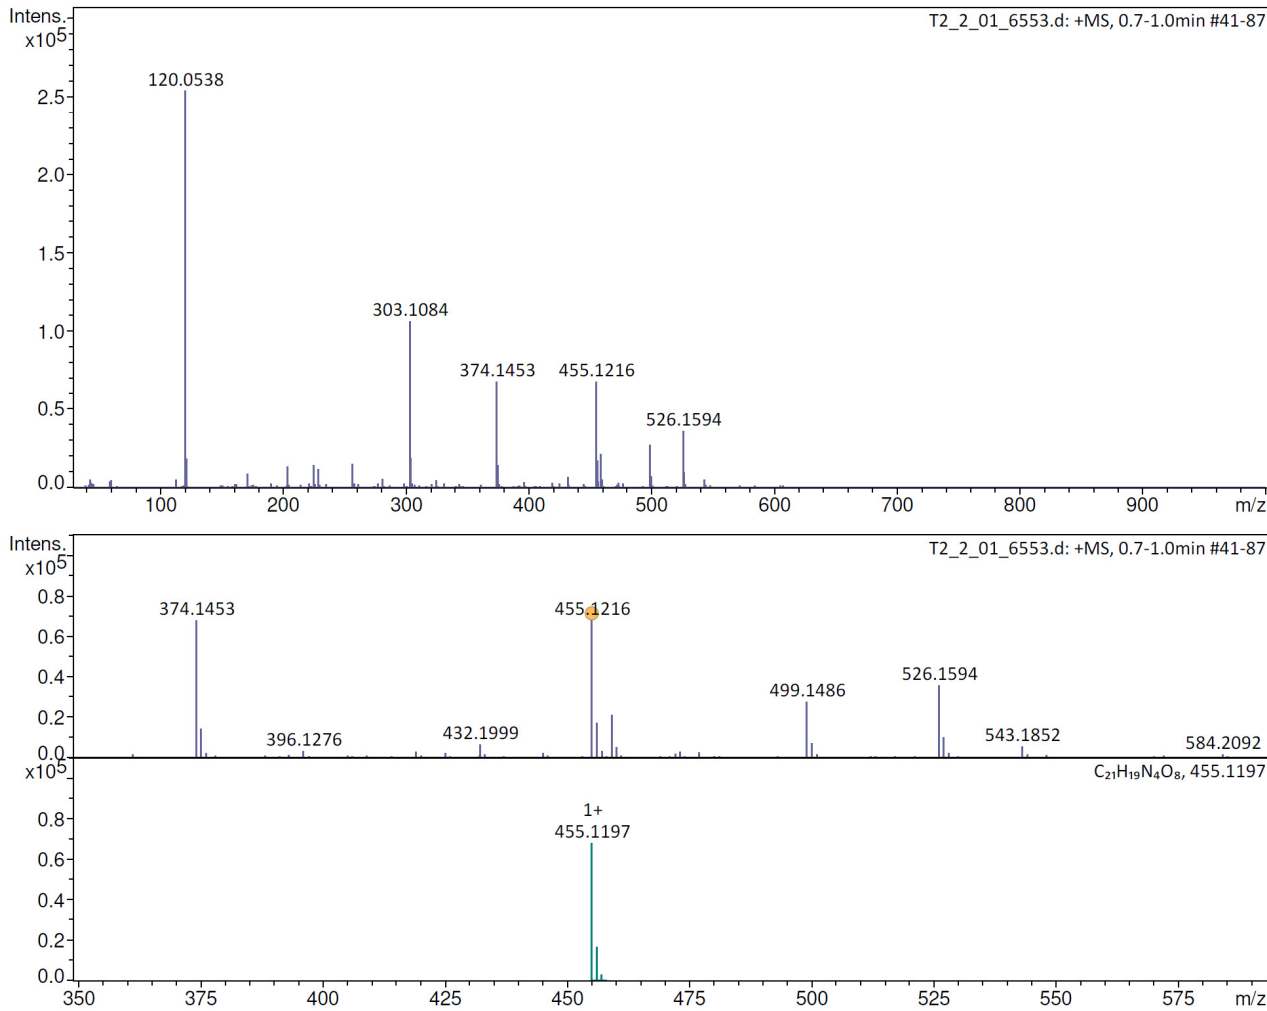

**(1-(2-(5-nitro-isatin-1-yl)ethyl)-1,2,3-triazol-4-yl)methyl 3,4,5-trihydroxybenzoate (25)**

**<sup>1</sup>H NMR (300 MHz)**

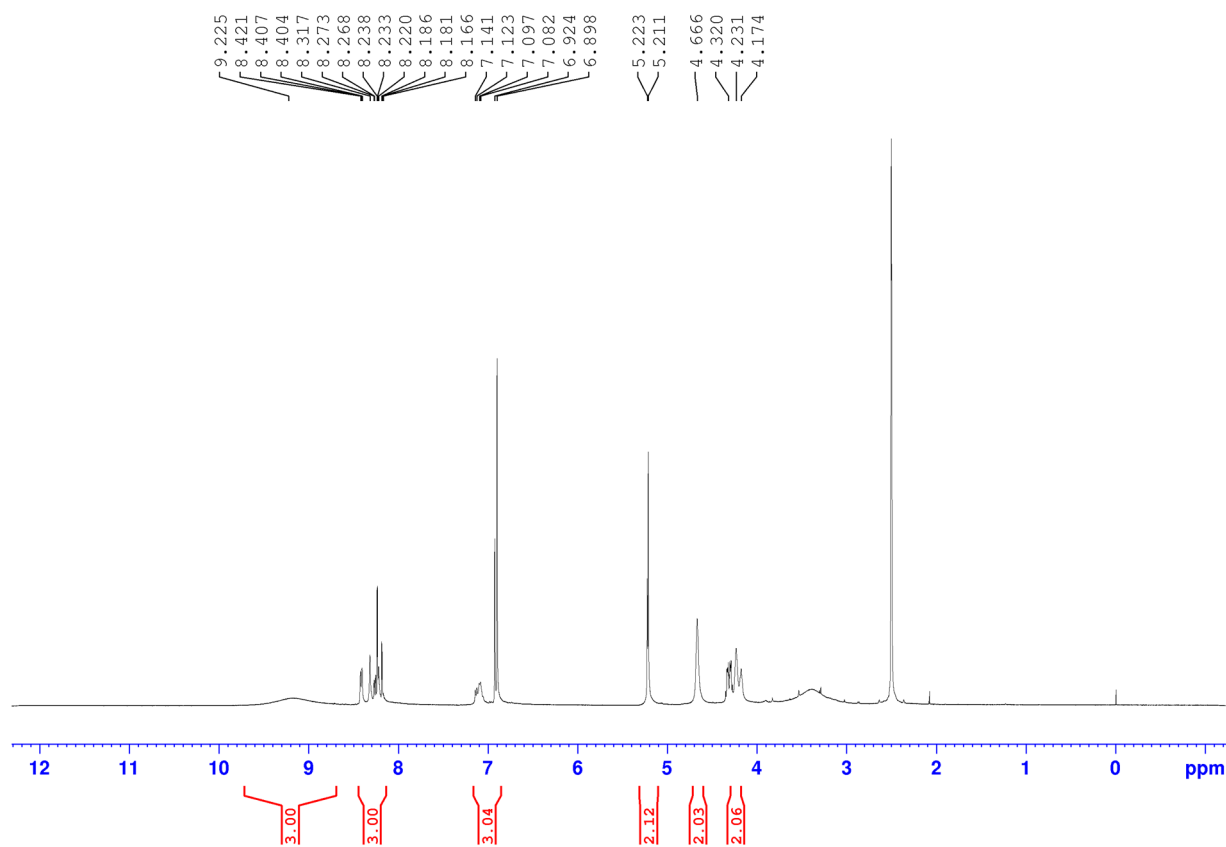

**$^{13}\text{C}$  NMR (125 MHz)**

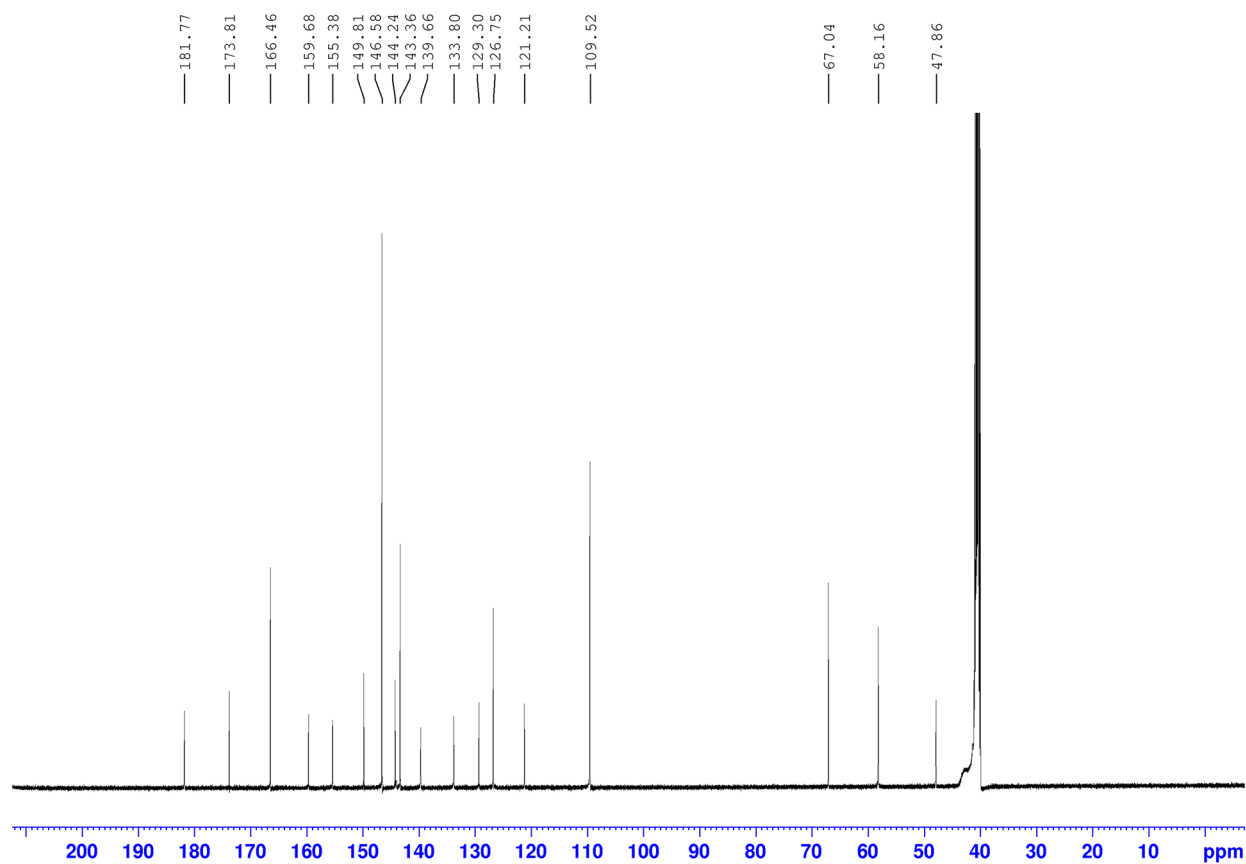



## COSY NMR (300 MHz)

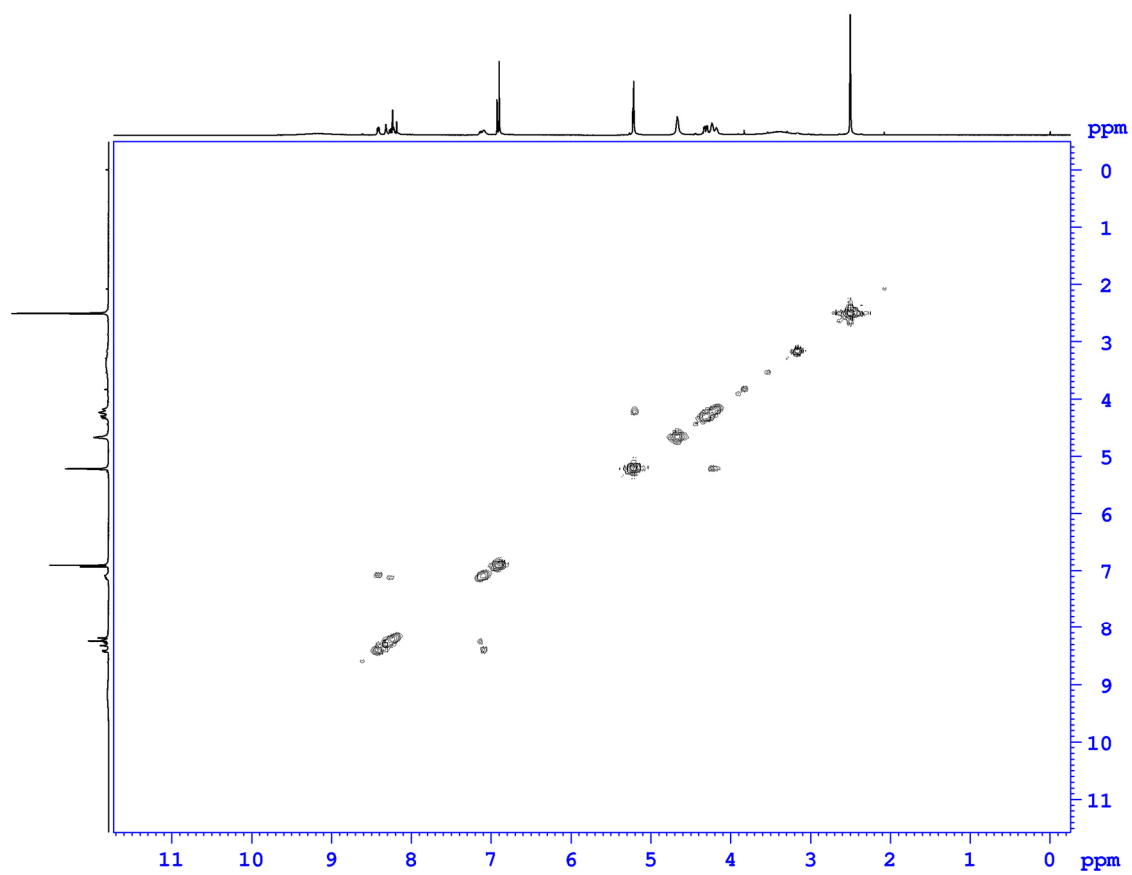

**(1-(2-(5-chloro-isatin-1-yl)ethyl)-1,2,3-triazol-4-yl)methyl 3,4,5-trihydroxybenzoate (26)**

**<sup>1</sup>H NMR (300 MHz)**

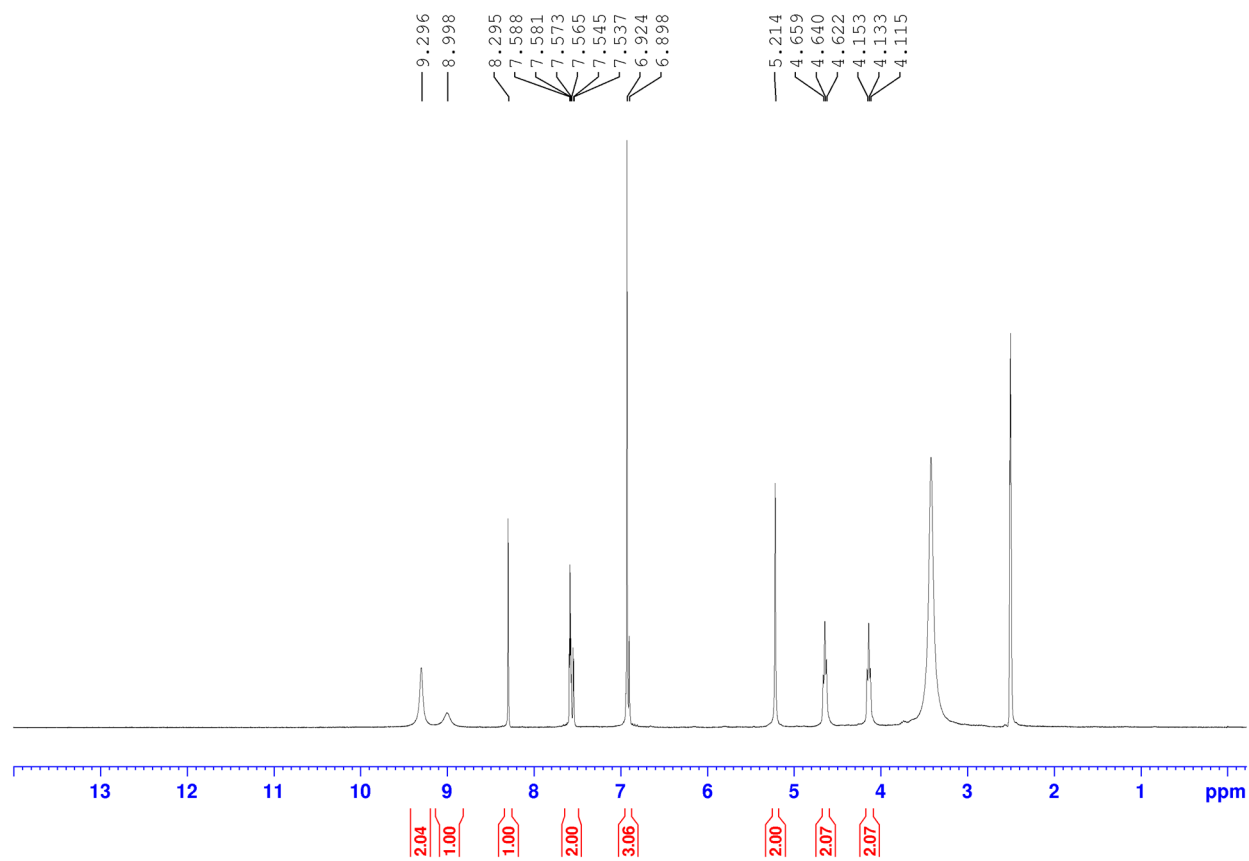

**$^{13}\text{C}$  NMR (125 MHz)**

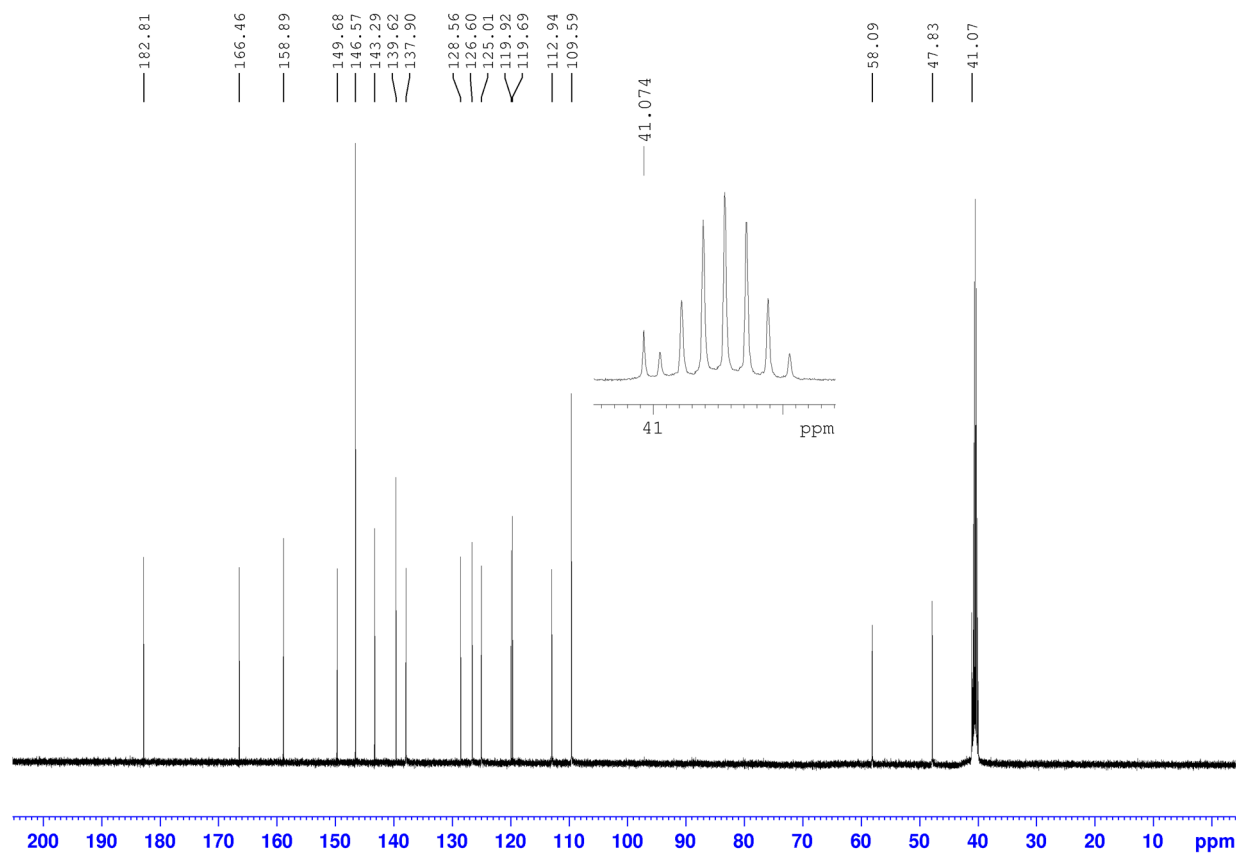

# COSY NMR (300 MHz)

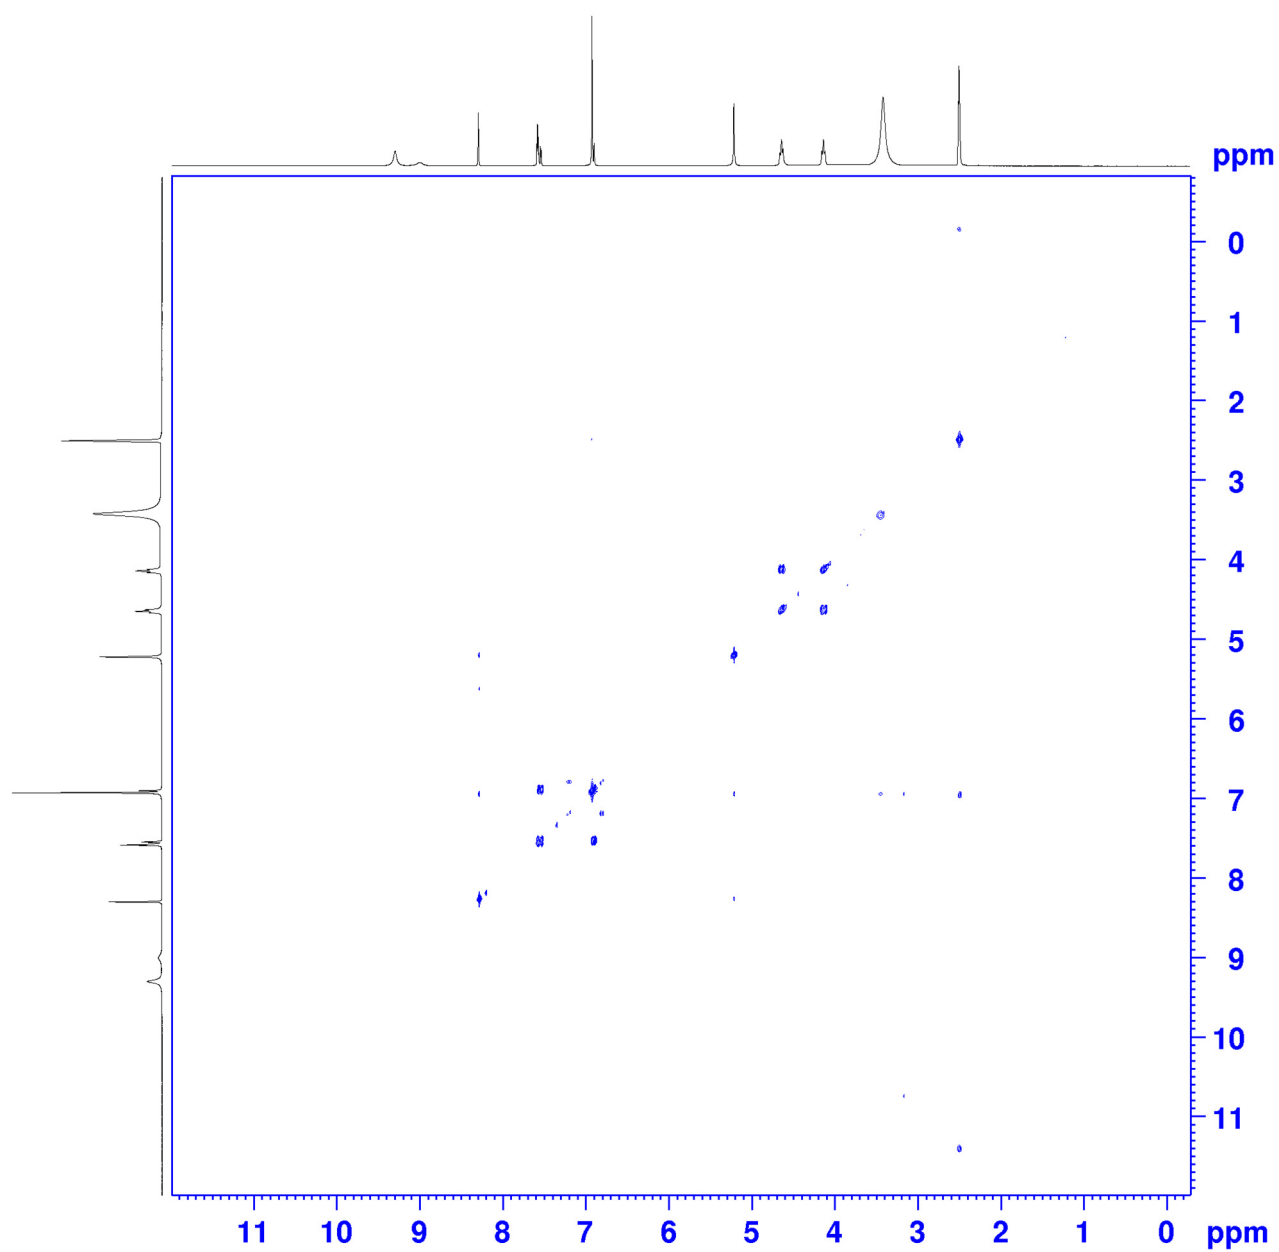

HRMS

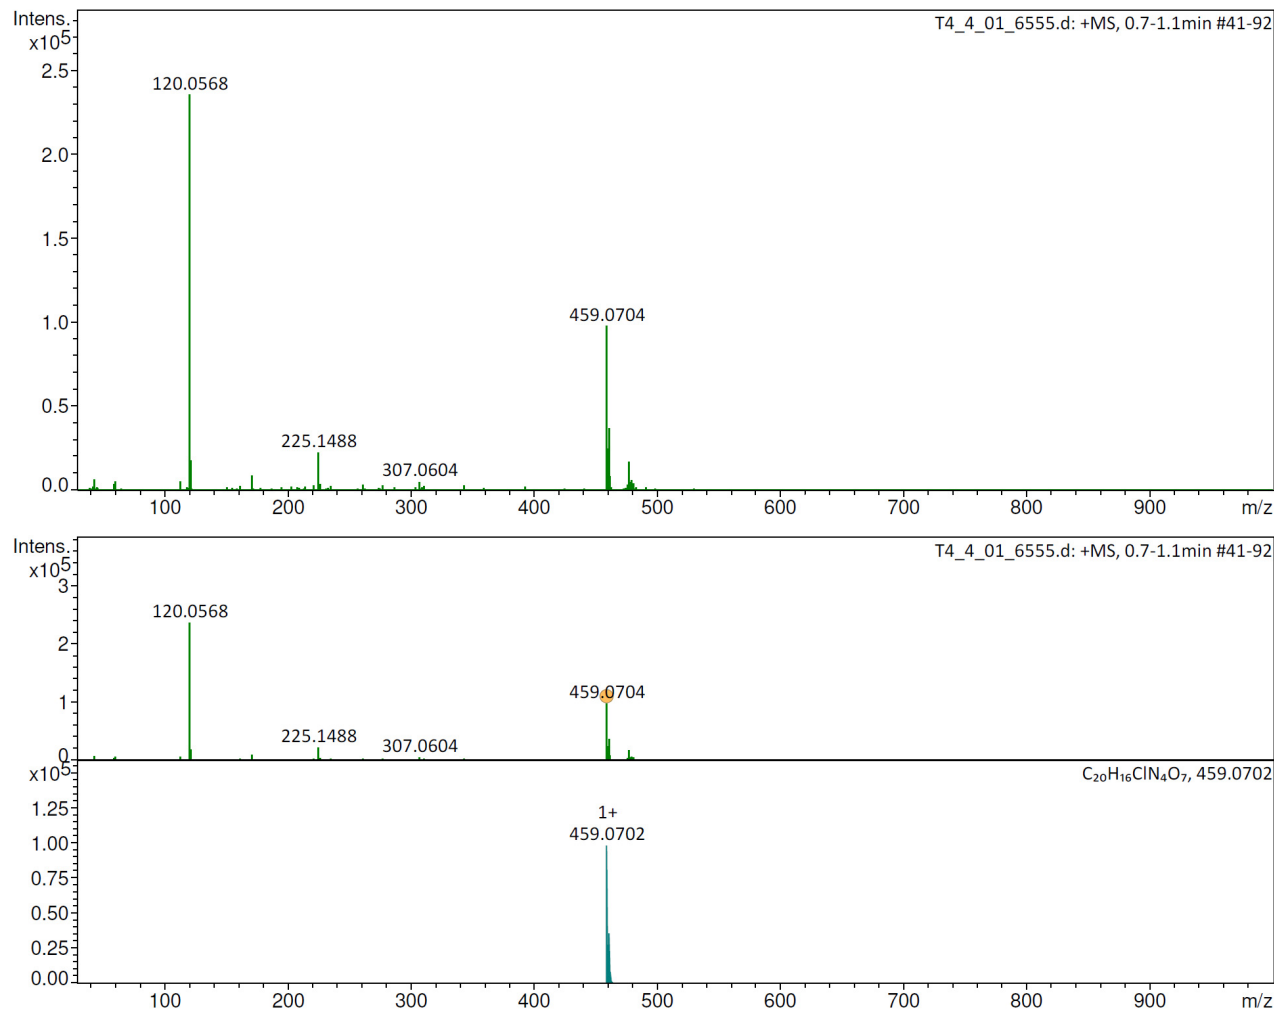

**(1-(2-(isatin-1-yl)ethyl)-1,2,3-triazol-4-yl)methyl 4-hydroxybenzoate (27)**

**<sup>1</sup>H NMR (300 MHz)**

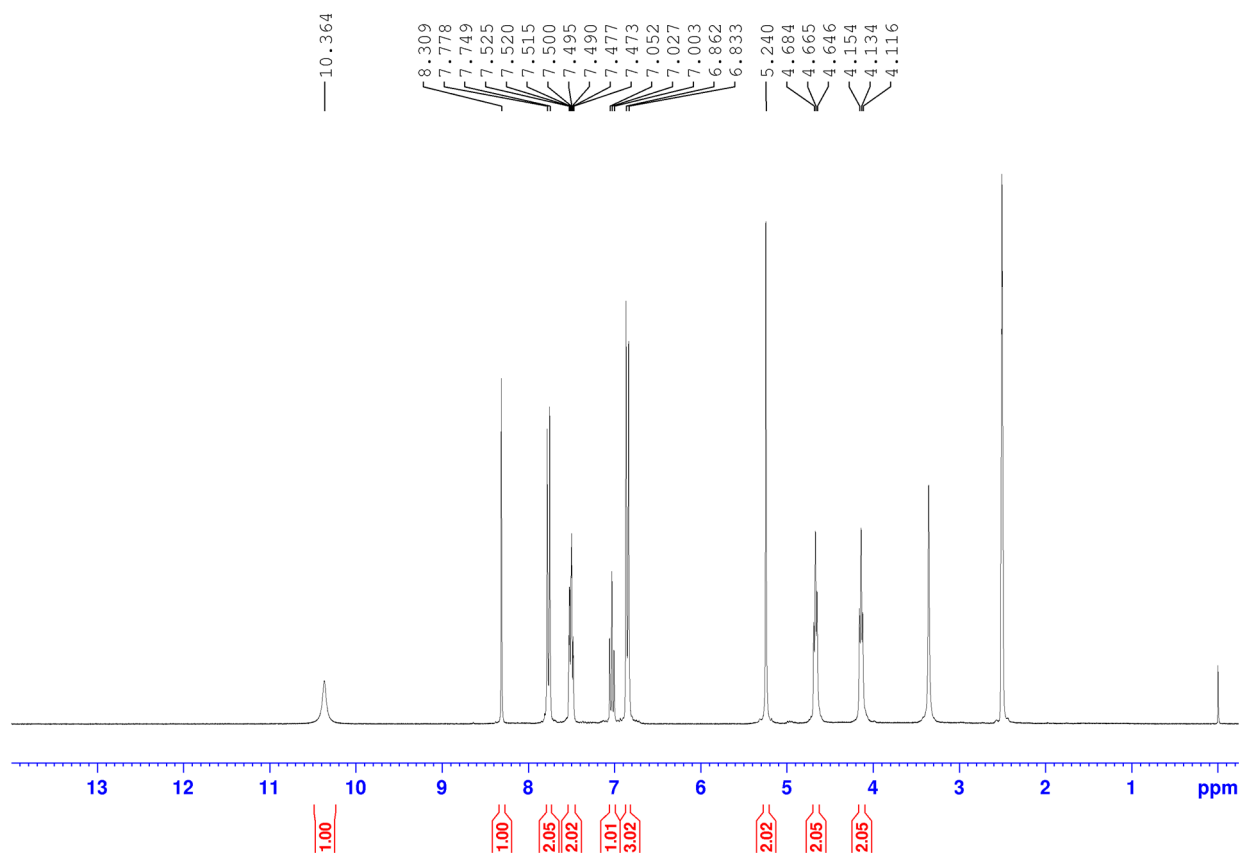

# $^{13}\text{C}$ NMR (125 MHz)

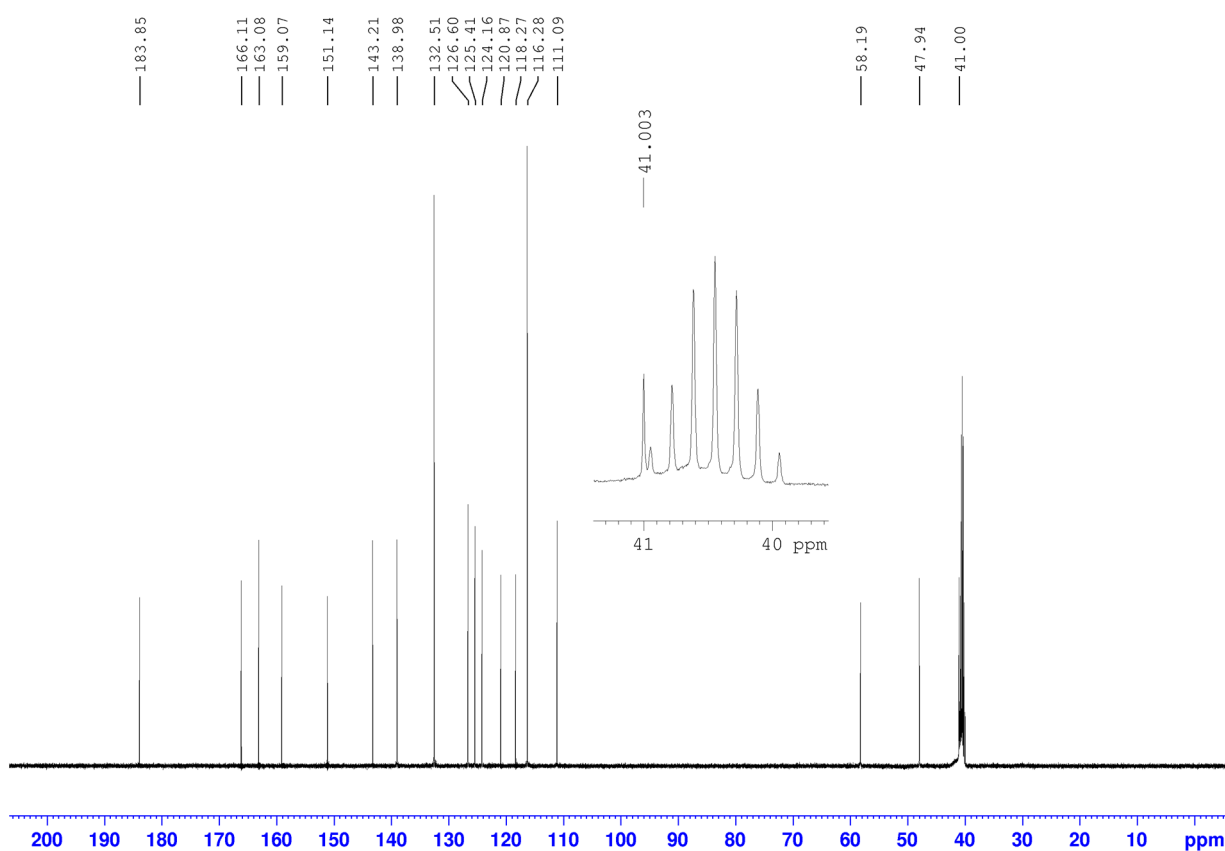

# COSY NMR (300 MHz)

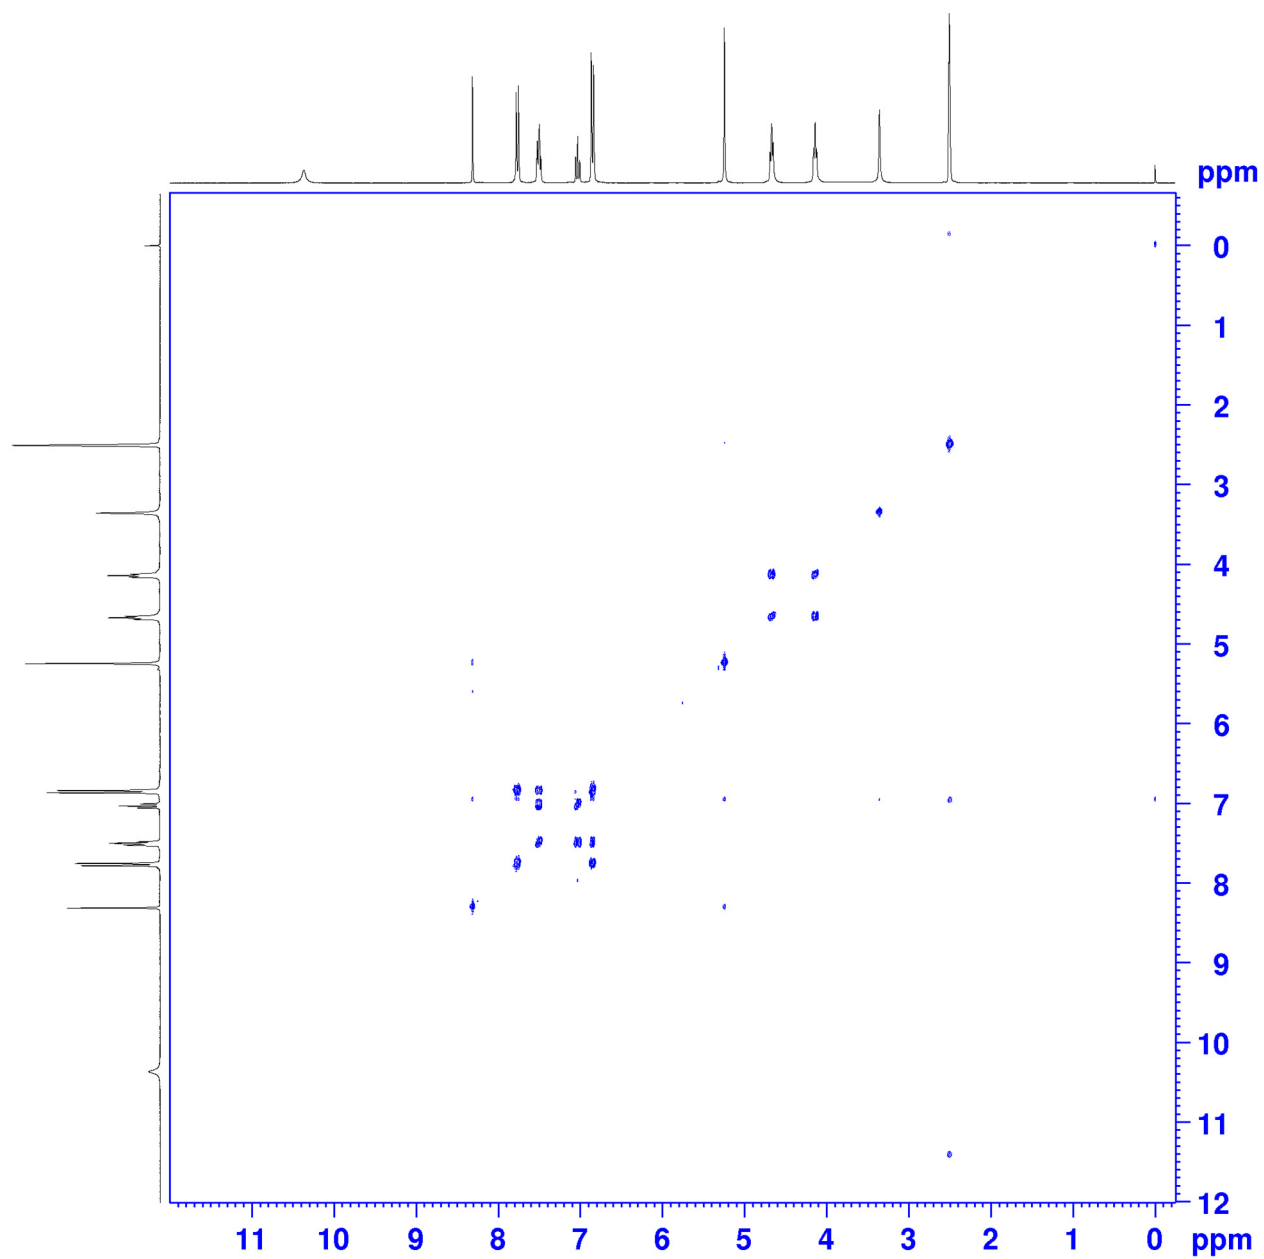



HRMS

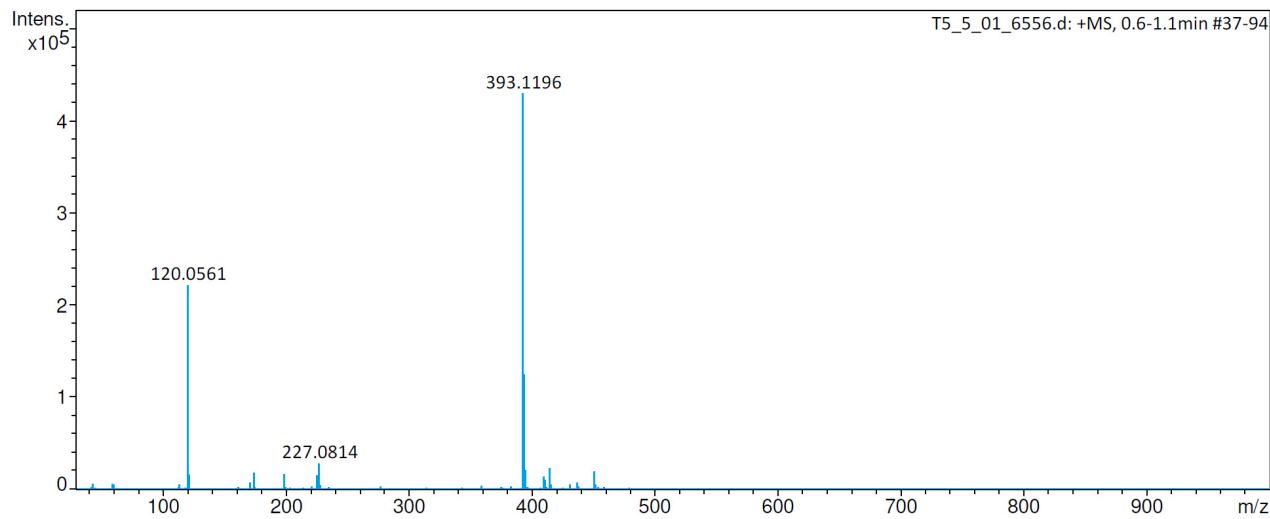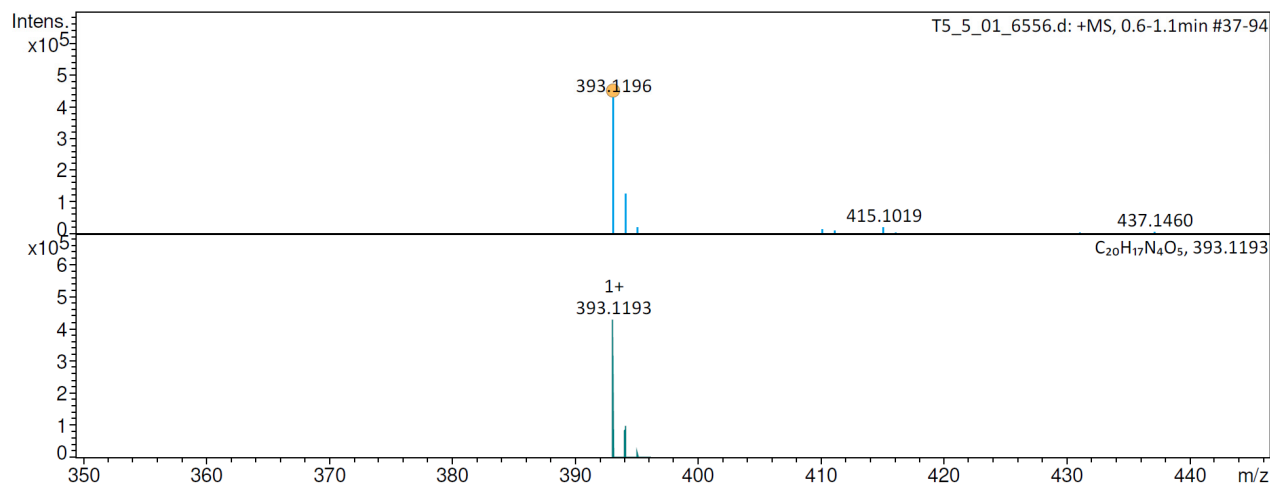

**(1-(2-(5-methoxy-isatin-1-yl)ethyl)-1,2,3-triazol-4-yl)methyl 4-hydroxybenzoate (28)**

**<sup>1</sup>H NMR (300 MHz)**

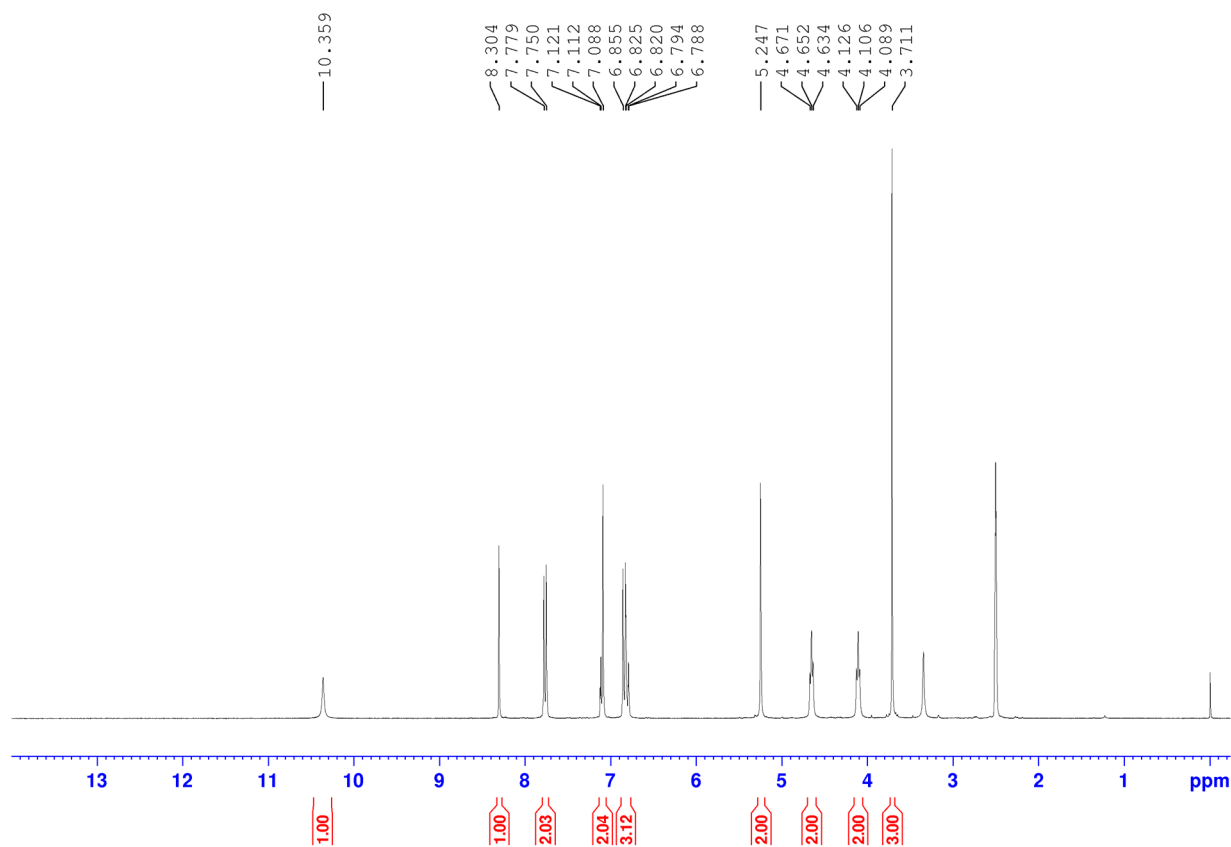

**$^{13}\text{C}$  NMR (125 MHz)**

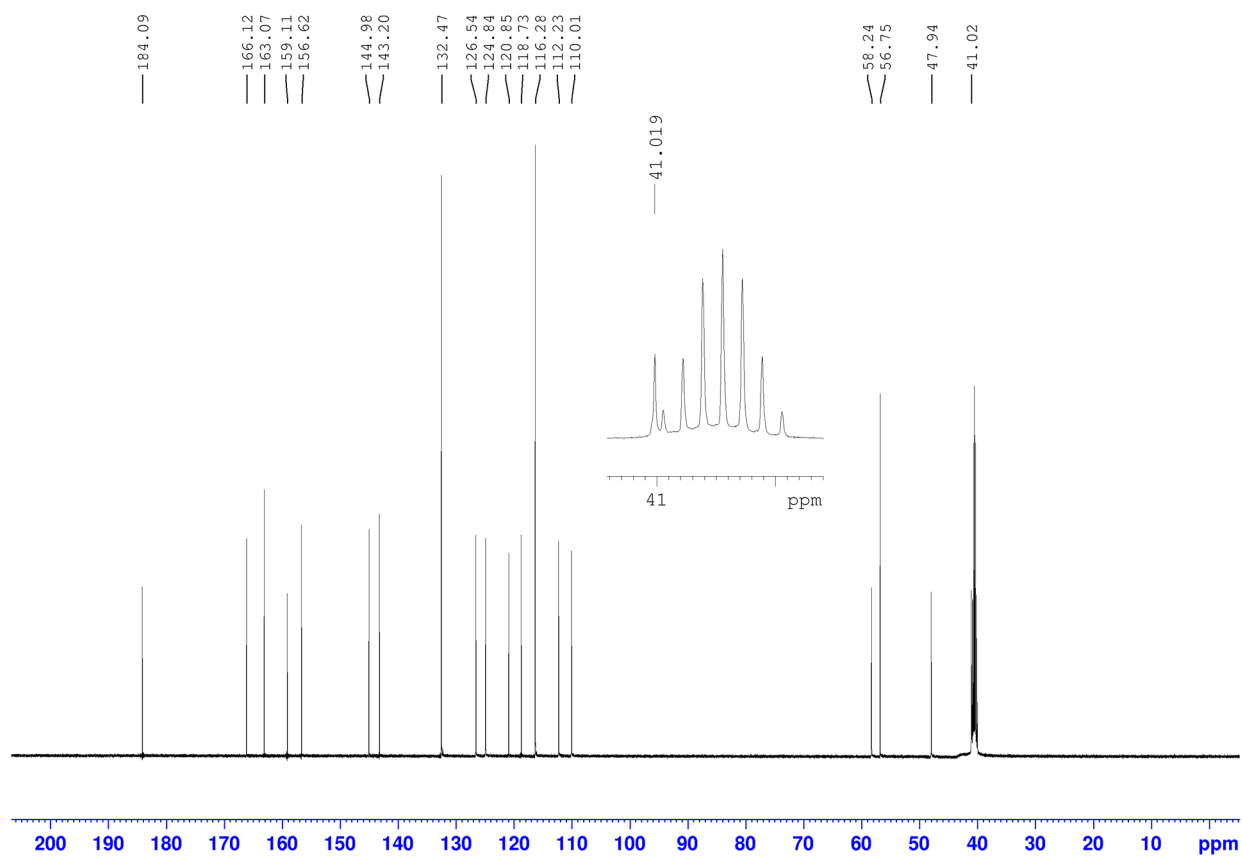

# COSY NMR (300 MHz)

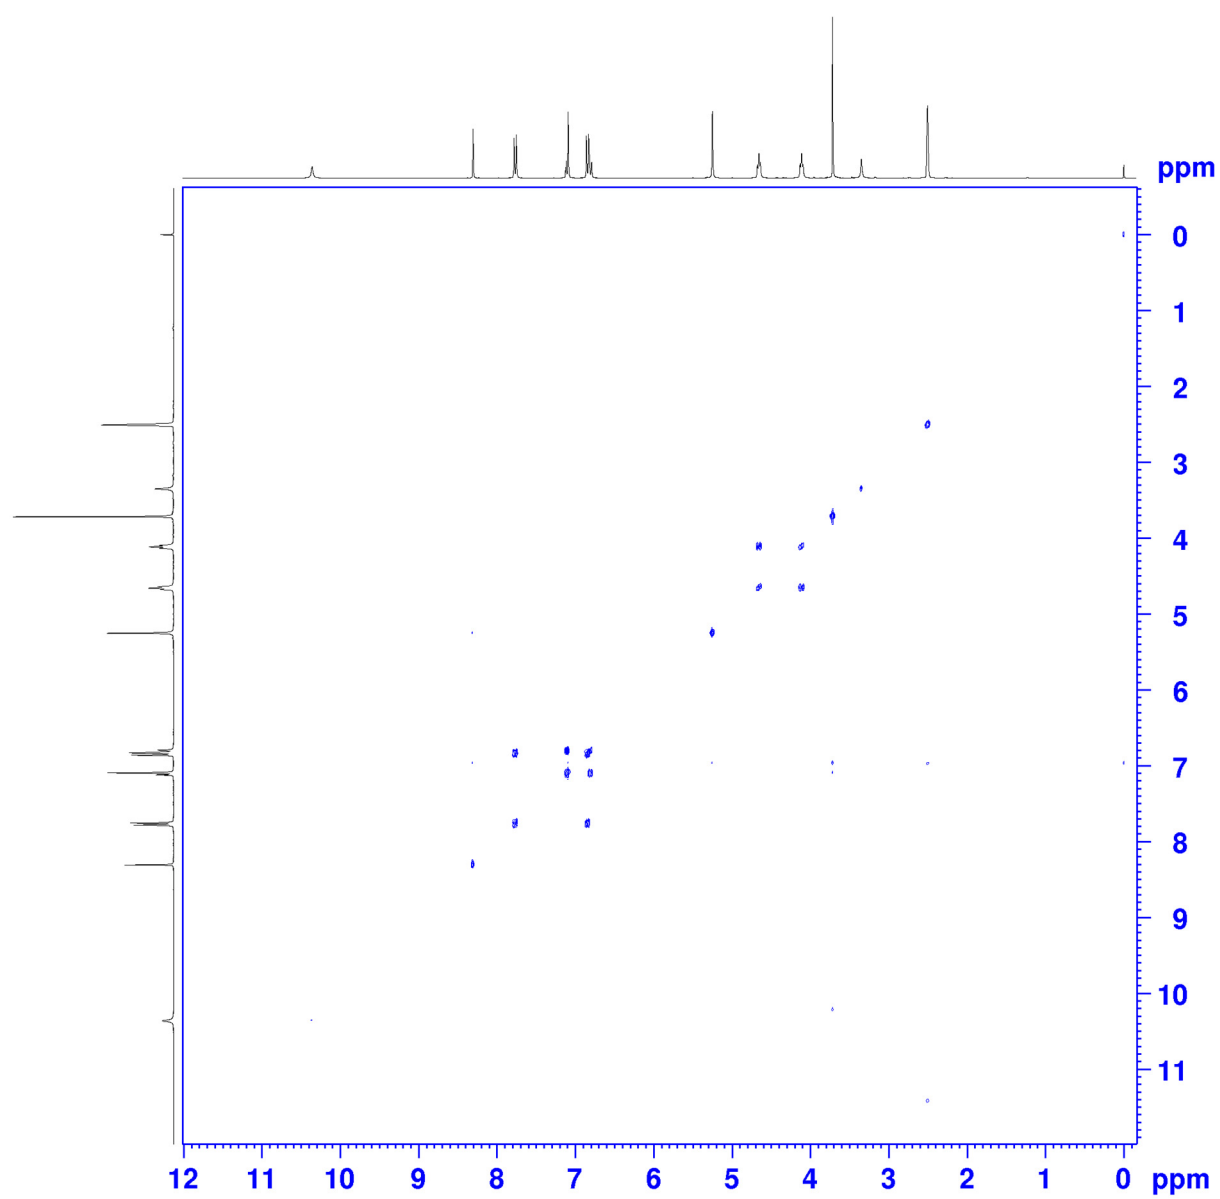

HRMS

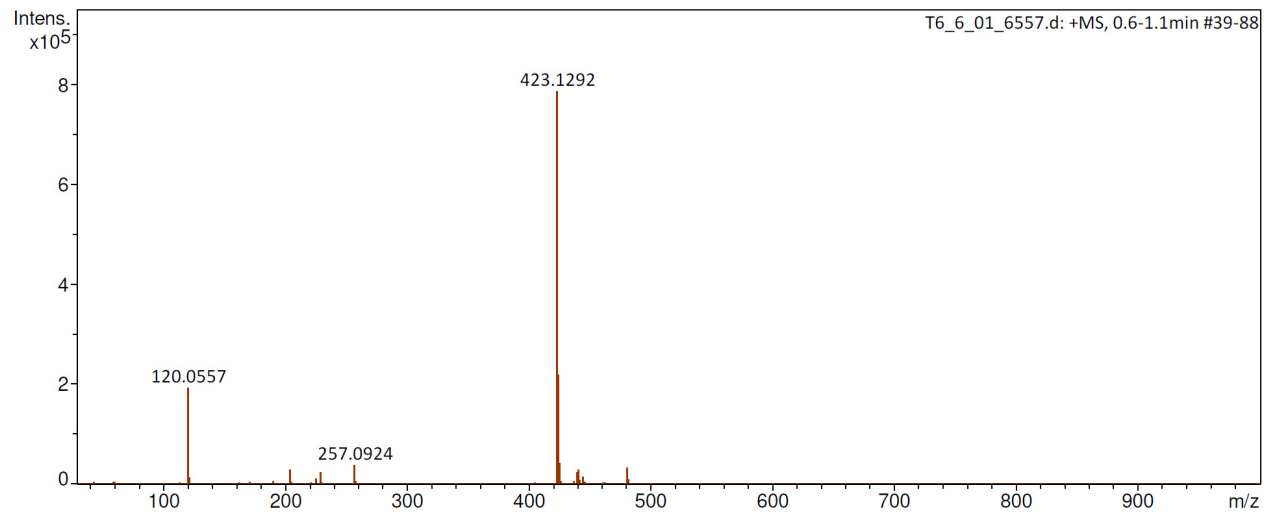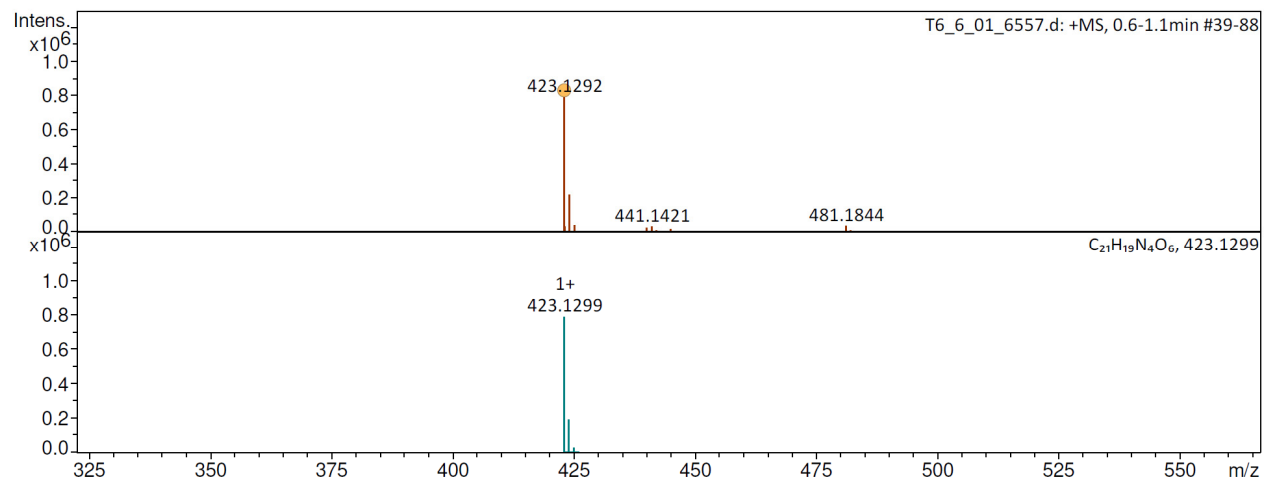

**(1-(2-(5-nitro-isatin-1-yl)ethyl)-1,2,3-triazol-4-yl)methyl 4-hydroxybenzoate (29)**

**<sup>1</sup>H NMR (500 MHz)**

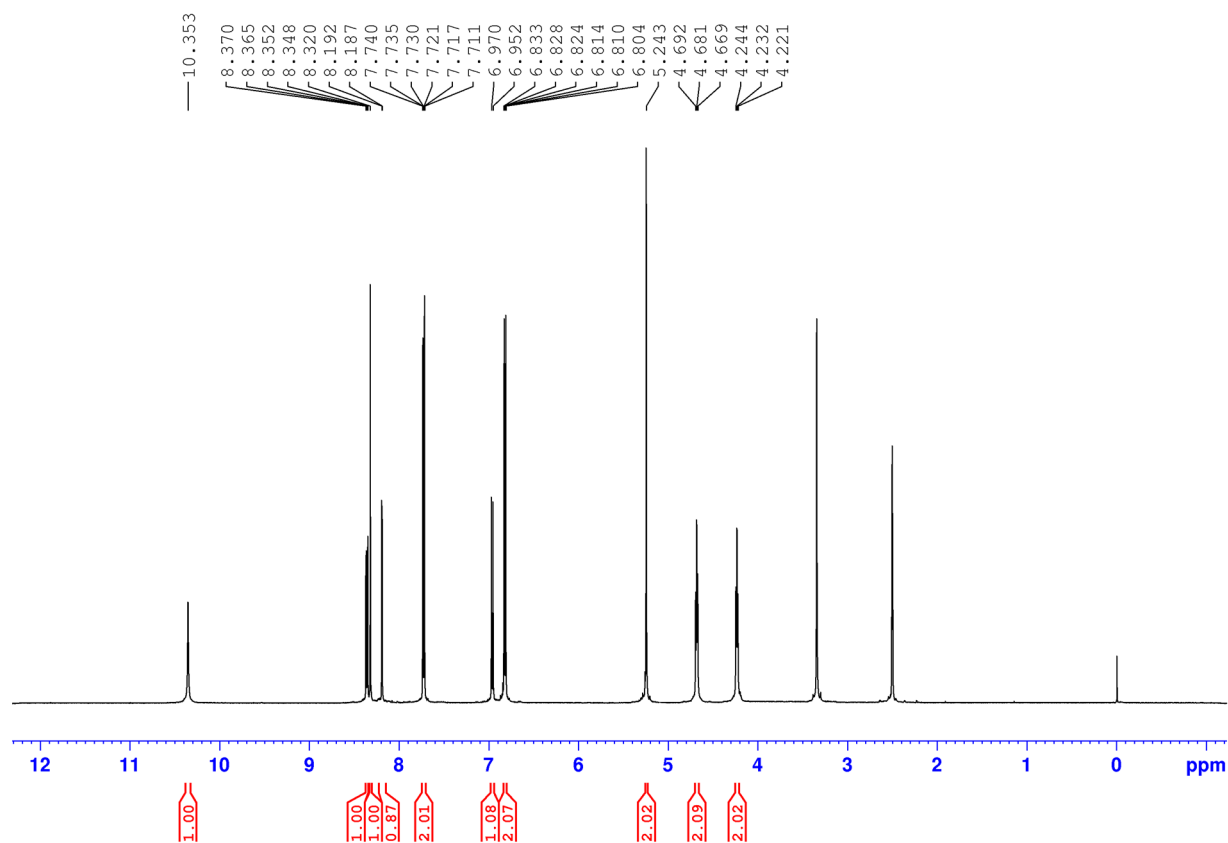

# <sup>13</sup>C NMR (125 MHz)

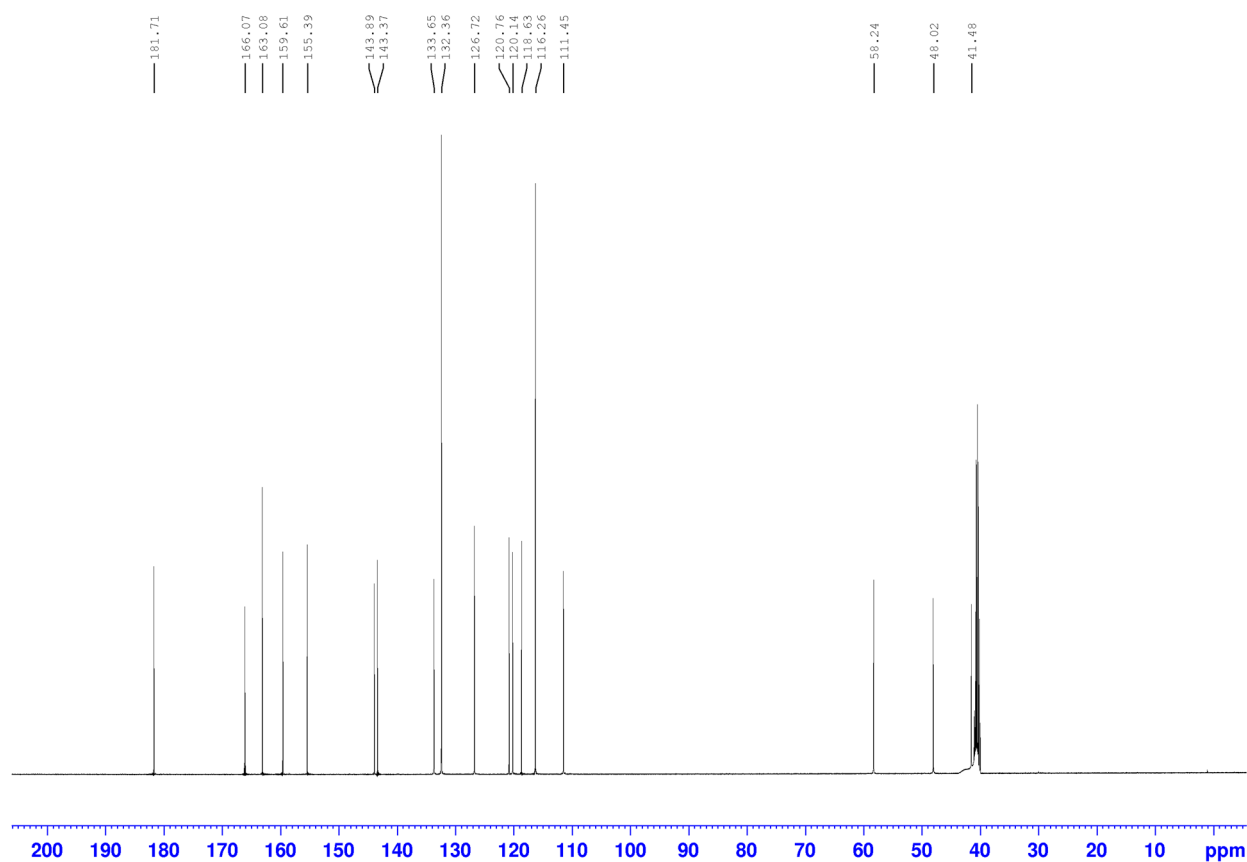

## COSY NMR (500 MHz)

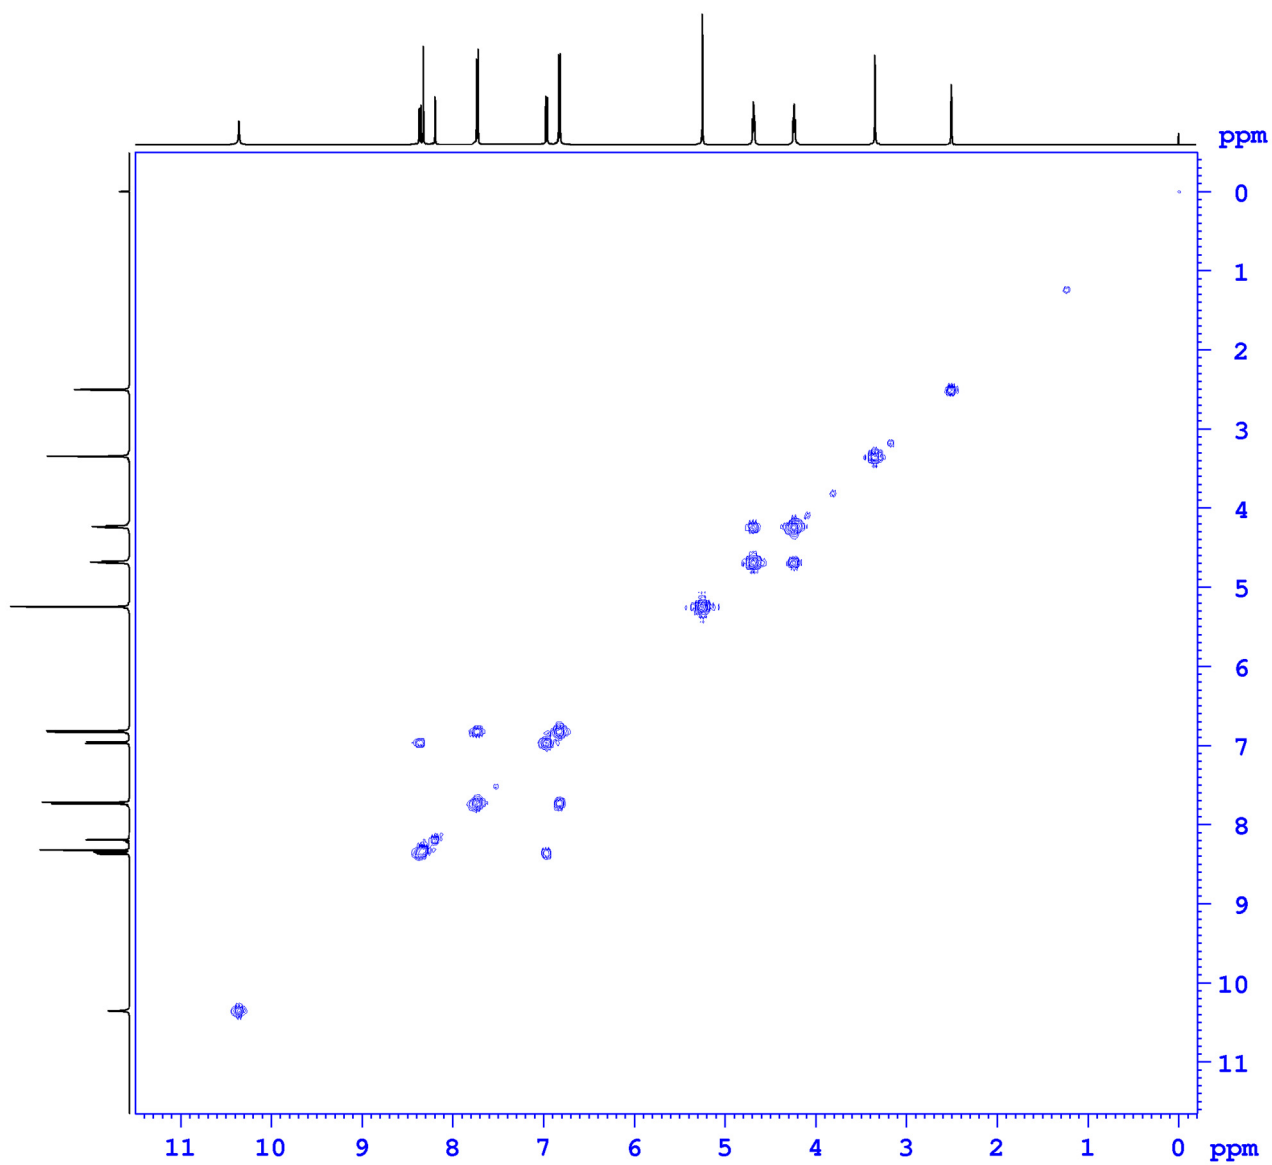



HRMS

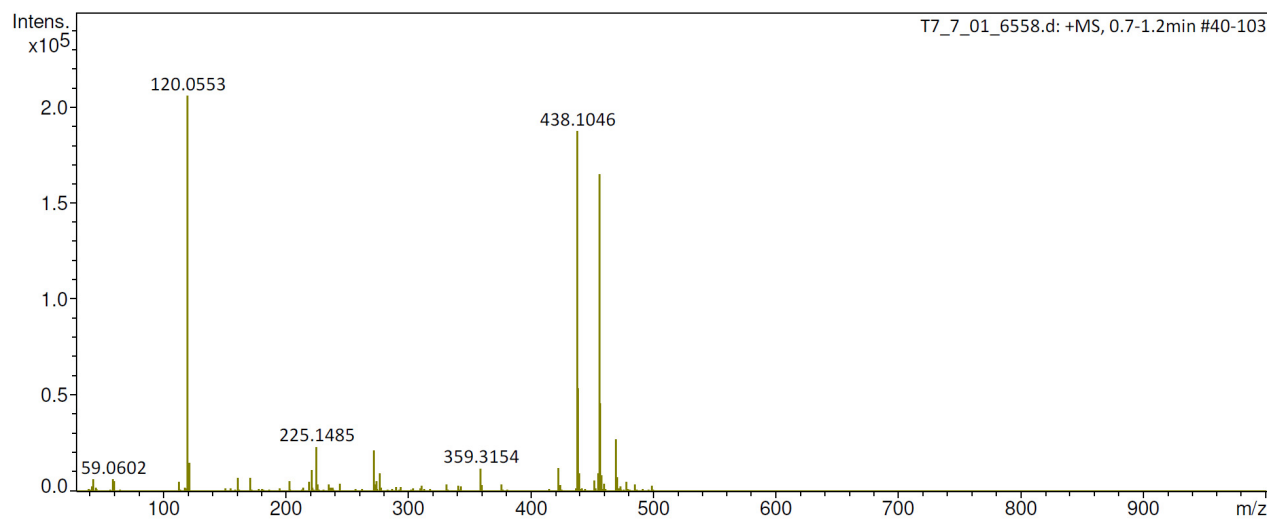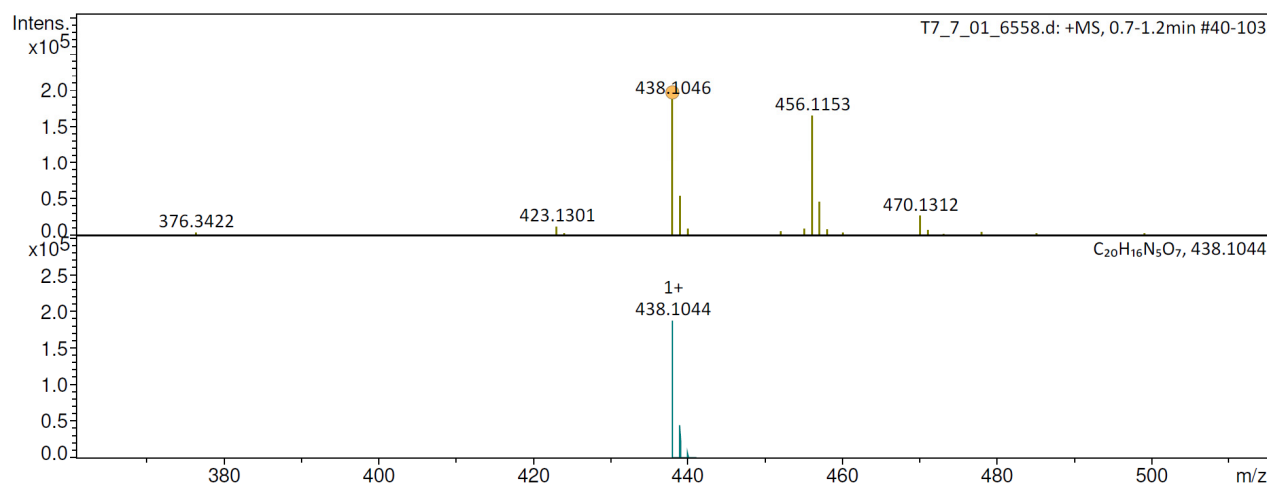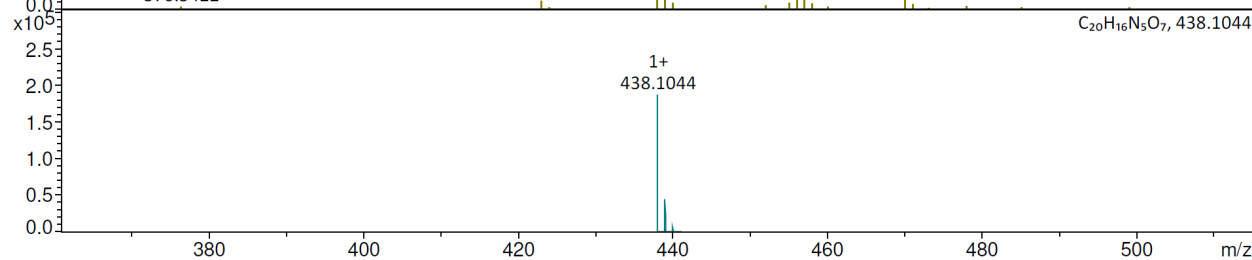

**(1-(2-(5-chloro-isatin-1-yl)ethyl)-1,2,3-triazol-4-yl)methyl 4-hydroxybenzoate (30)**

**<sup>1</sup>H NMR (300 MHz)**

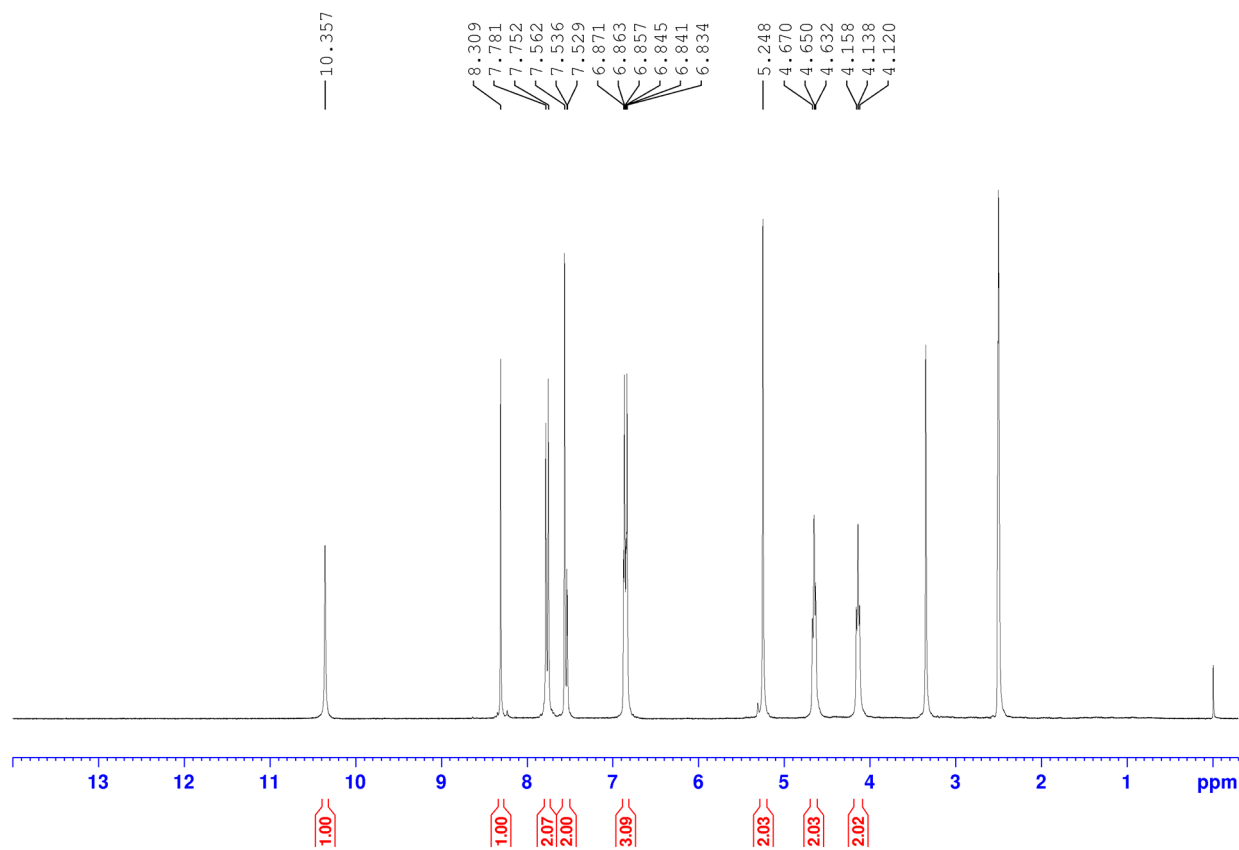

# $^{13}\text{C}$ NMR (125 MHz)

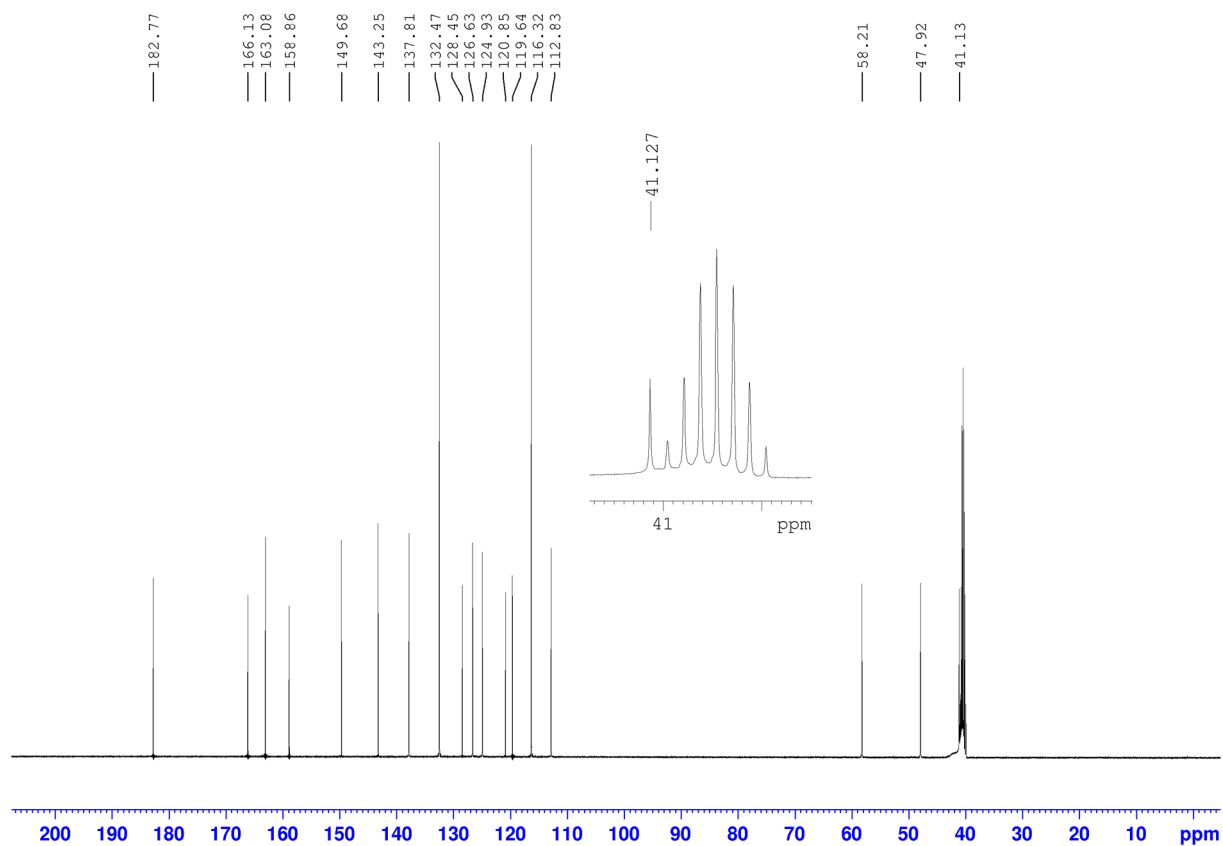

# COSY NMR (300 MHz)

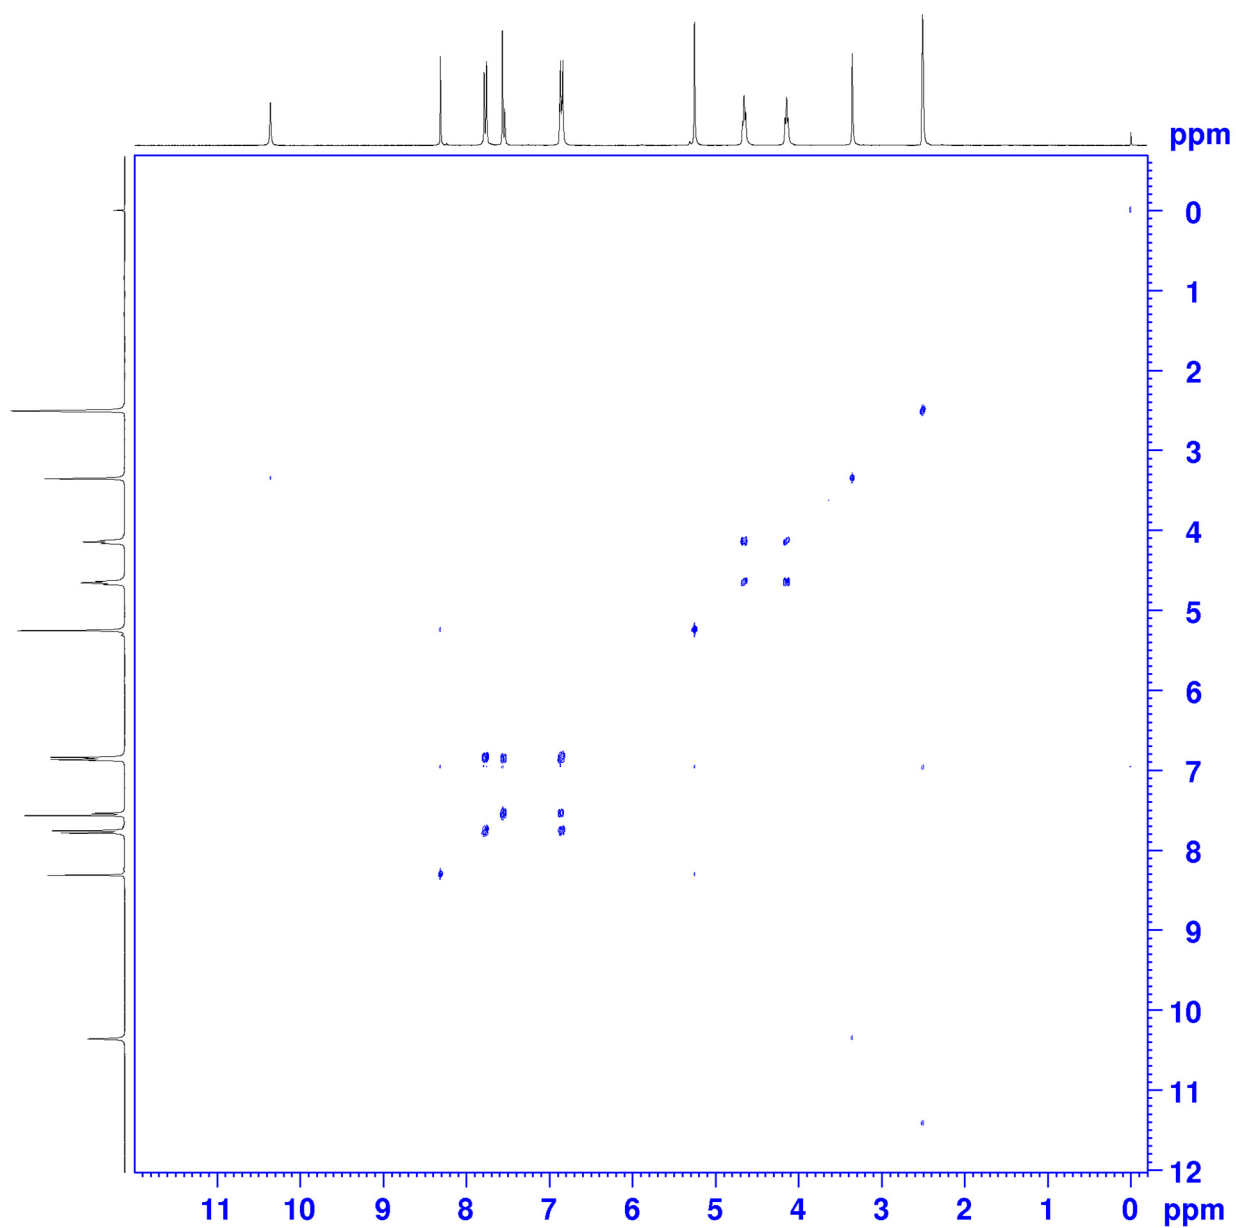

HRMS

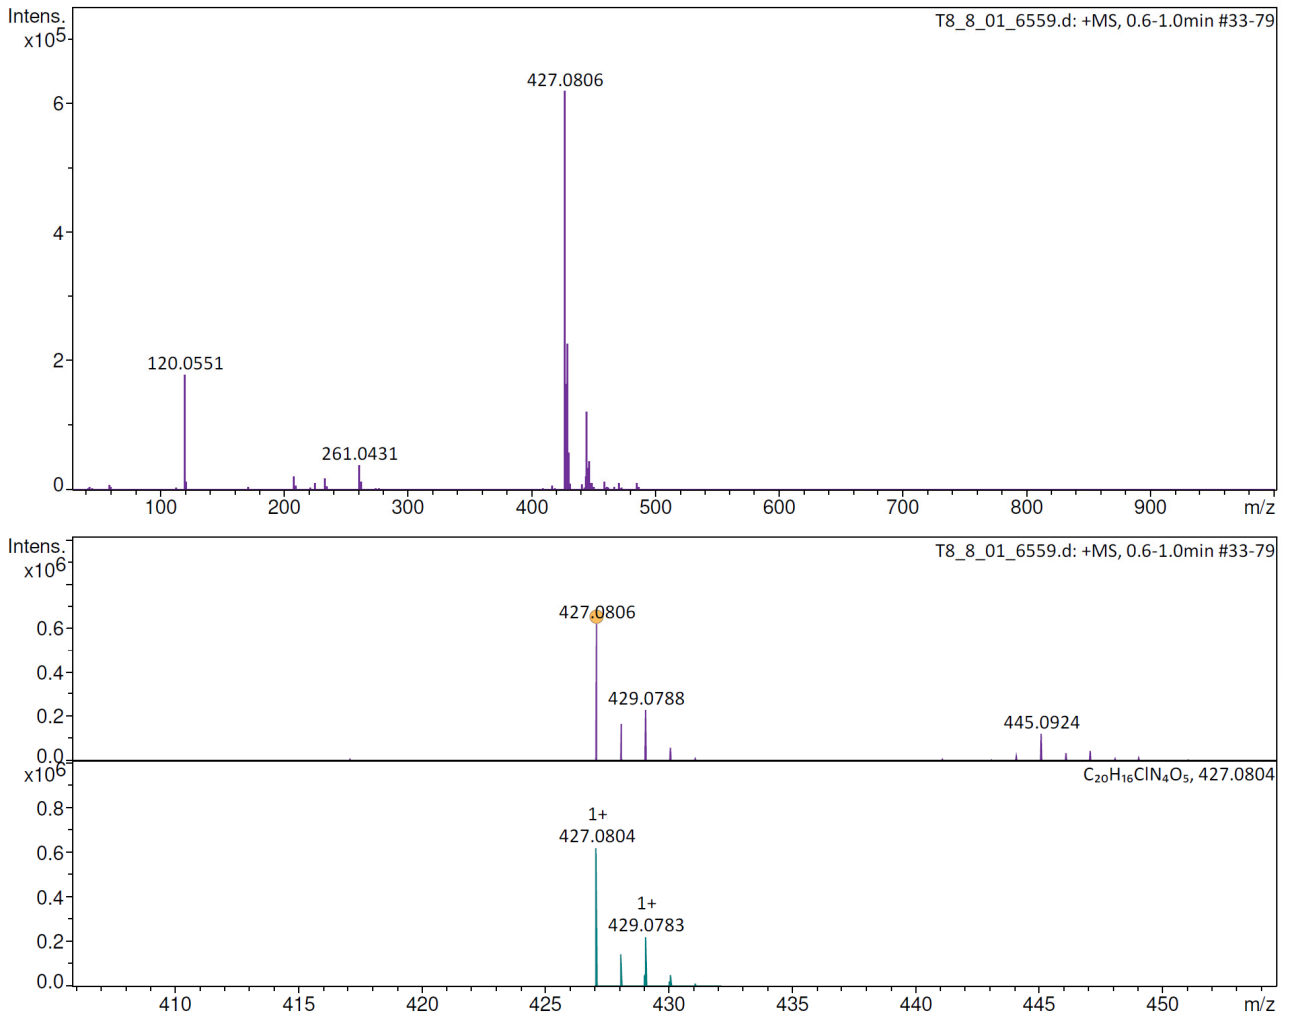

**(1-(2-(isatin-1-yl)ethyl)-1,2,3-triazol-4-yl)methyl (E)-3-(3,4-dihydroxyphenyl)acrylate (31)**

**<sup>1</sup>H NMR (300 MHz)**

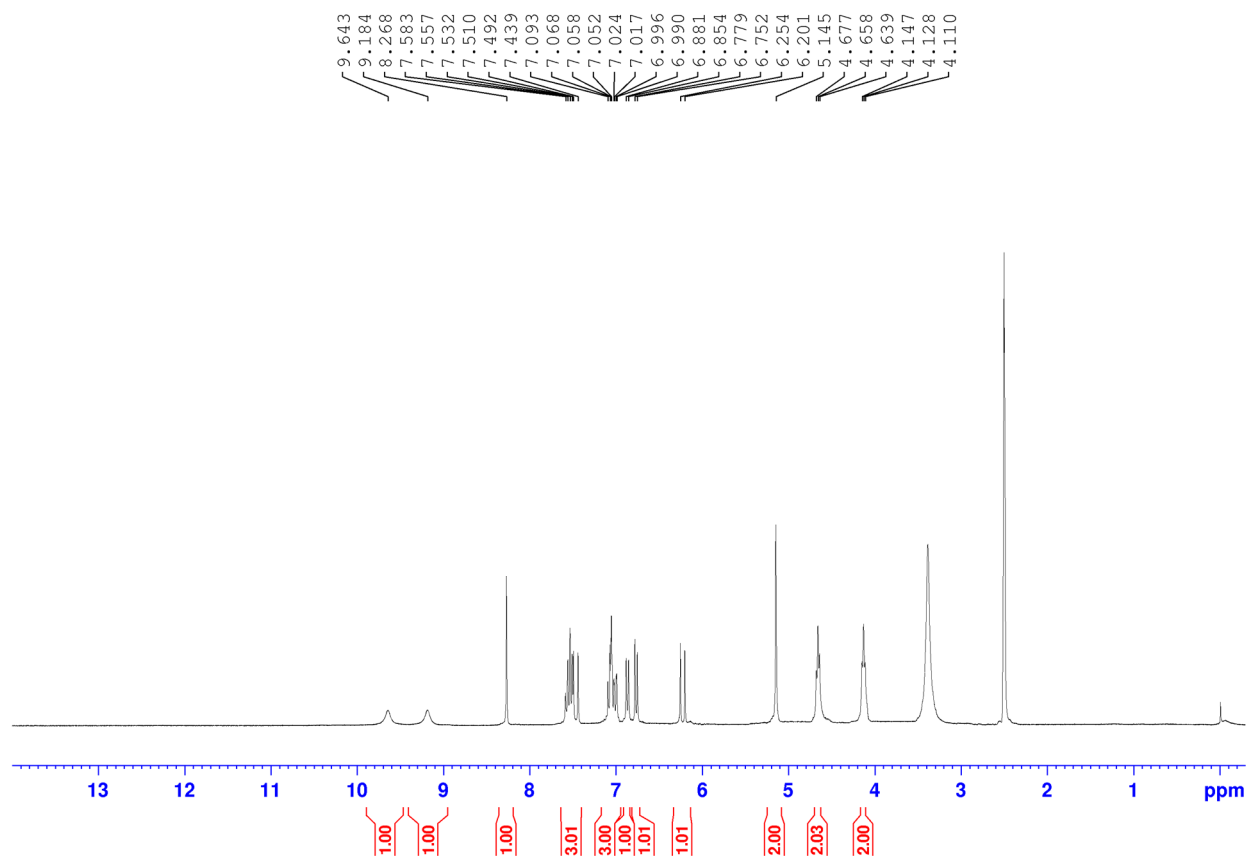

**$^{13}\text{C}$  NMR (125 MHz)**

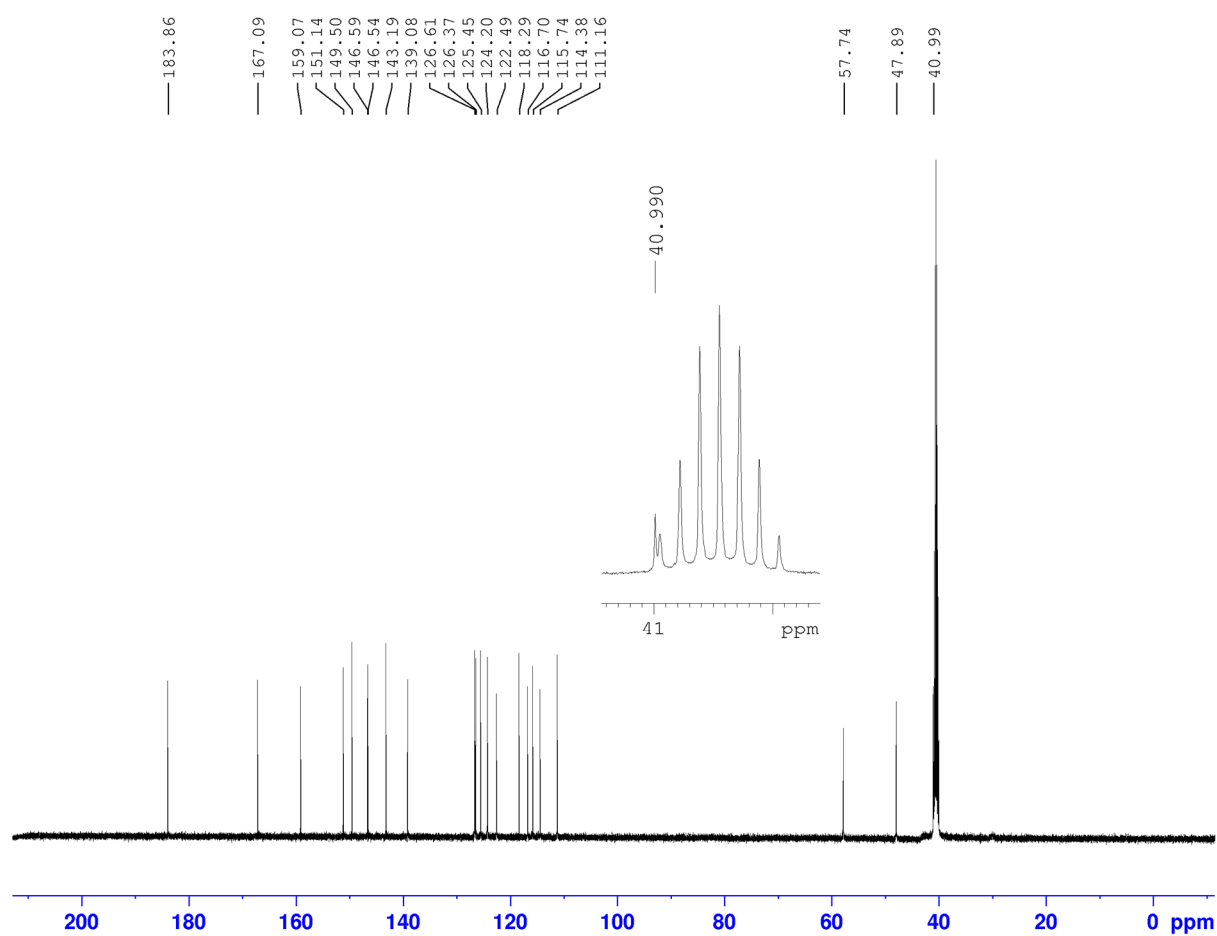

### COSY NMR (300 MHz)

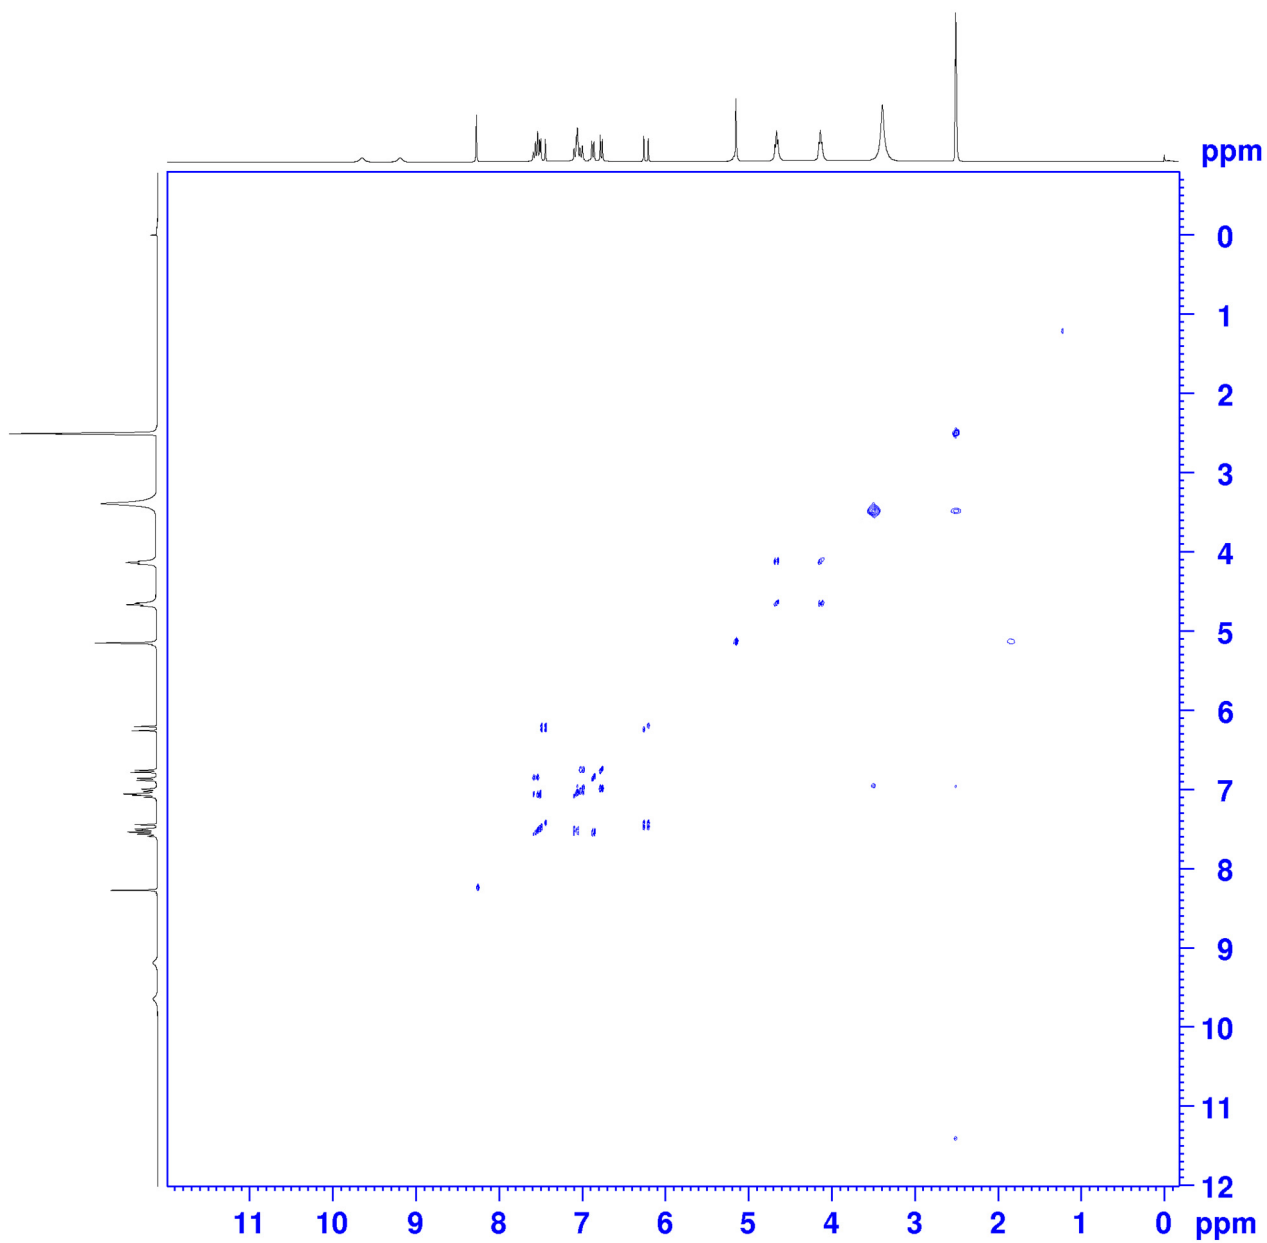



HRMS

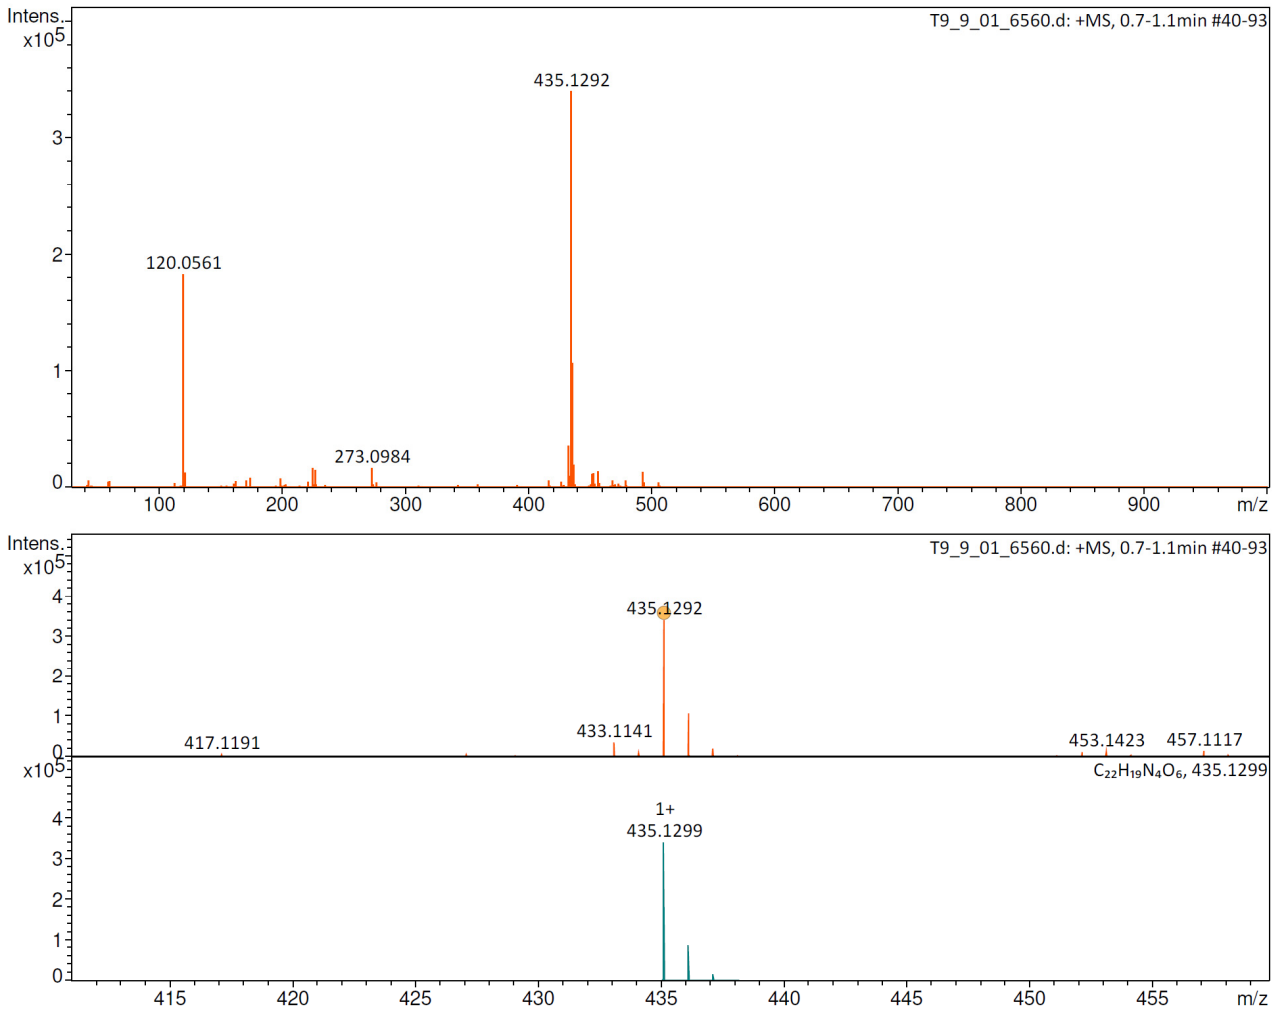

(1-(2-(5-methoxyisatin-1-yl)ethyl)-1,2,3-triazol-4-yl)methyl (E)-3-(3,4-dihydroxyphenyl)acrylate (32)

<sup>1</sup>H NMR (500 MHz)

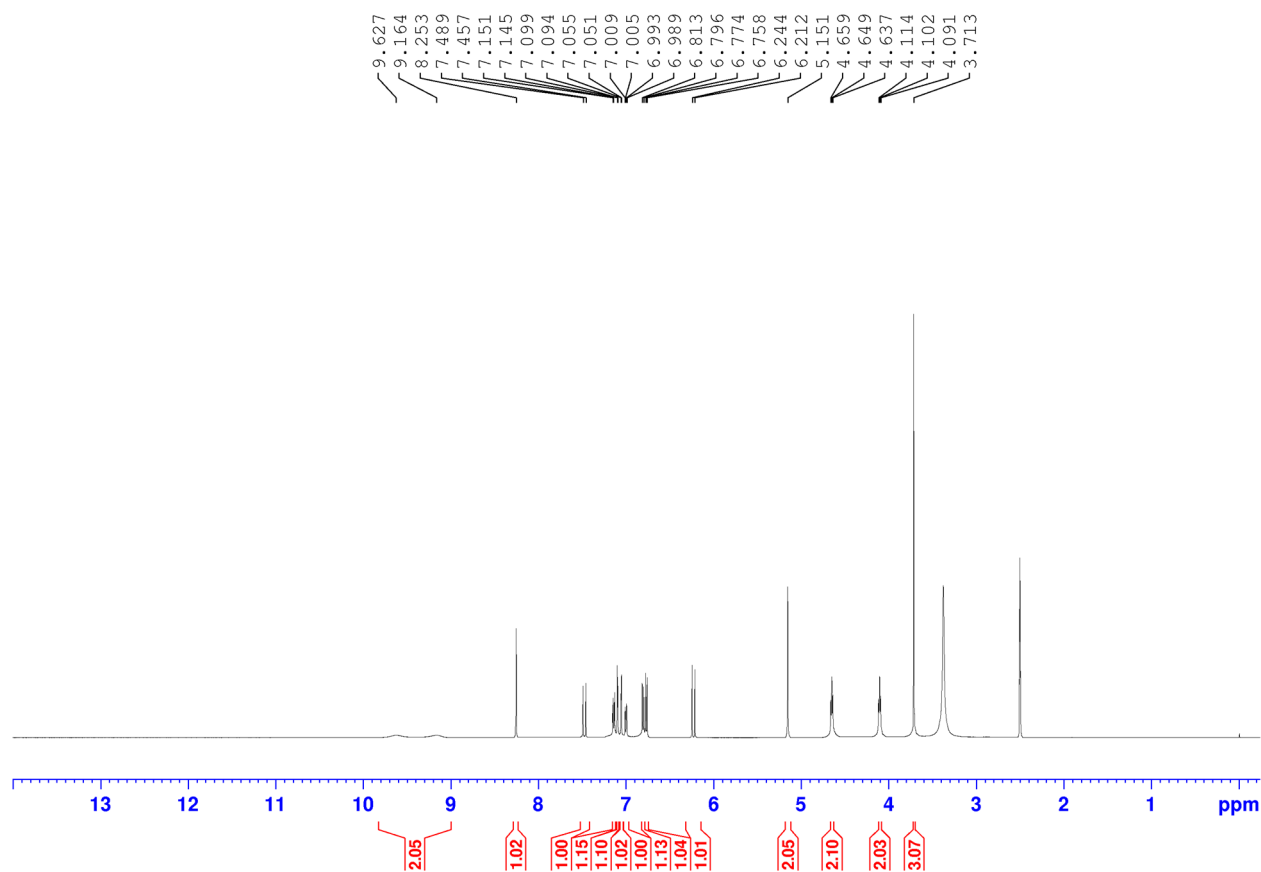

**$^{13}\text{C}$  NMR (125 MHz)**

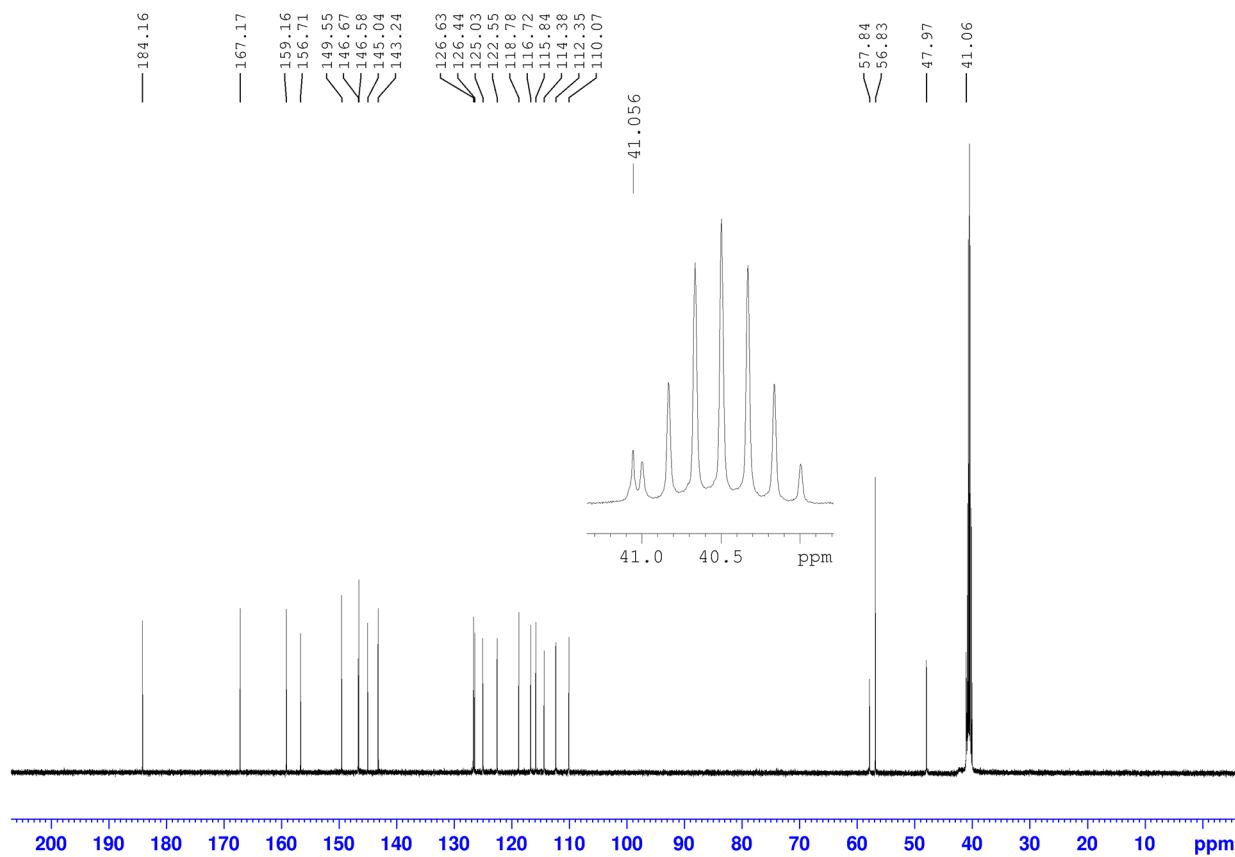

# COSY NMR (300 MHz)

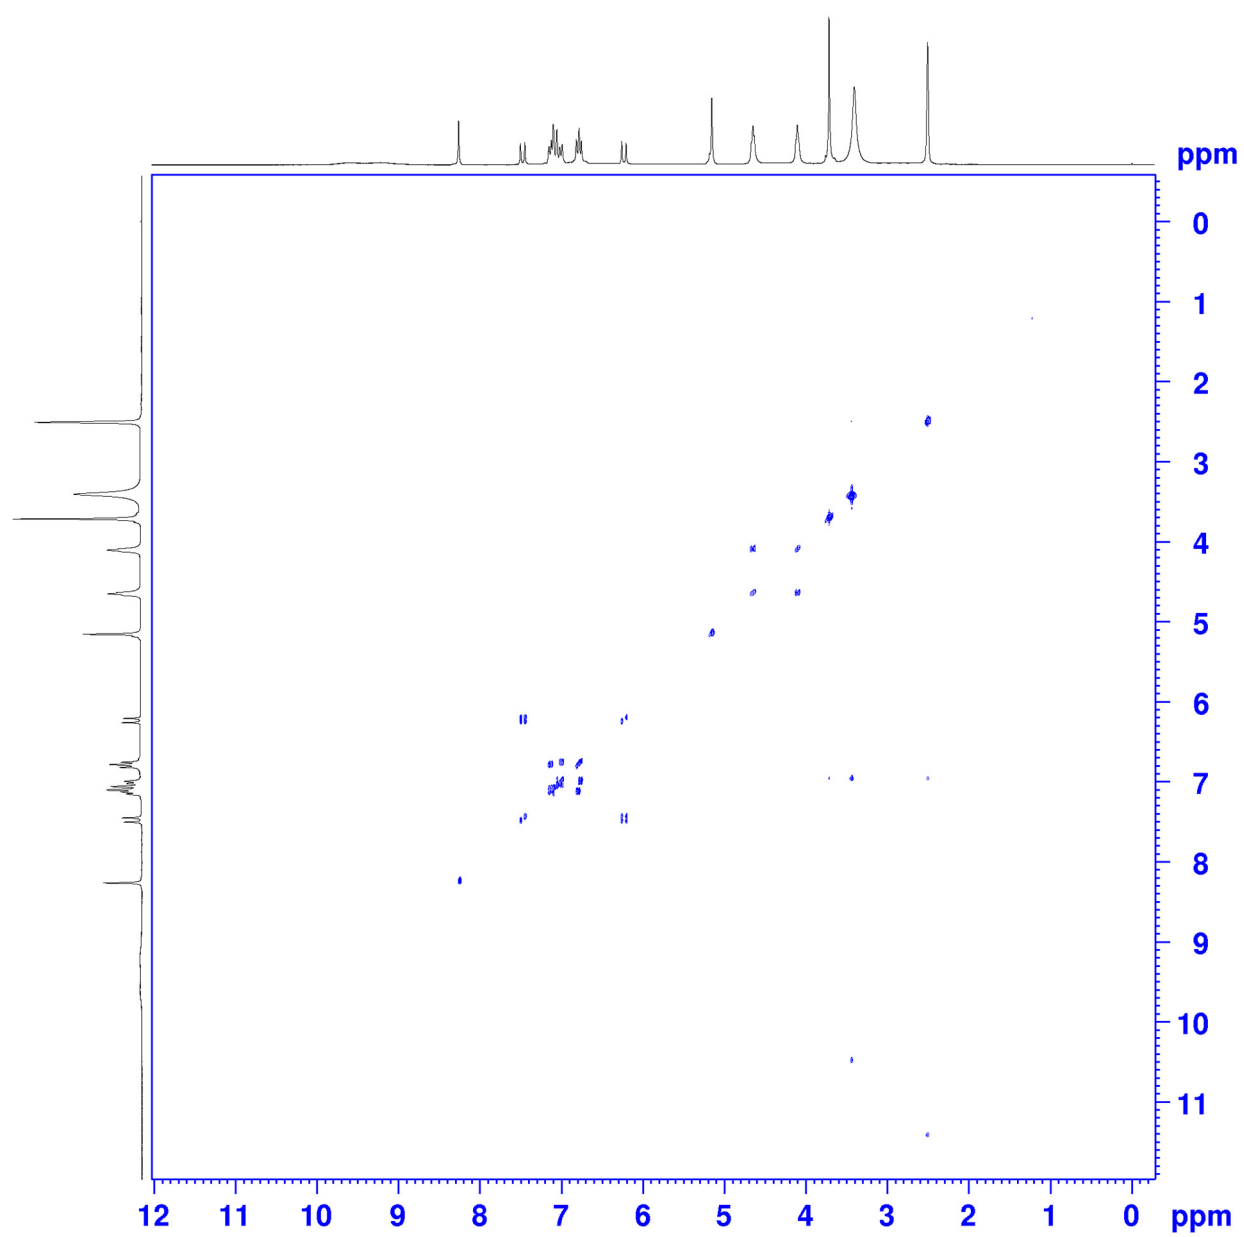

HRMS

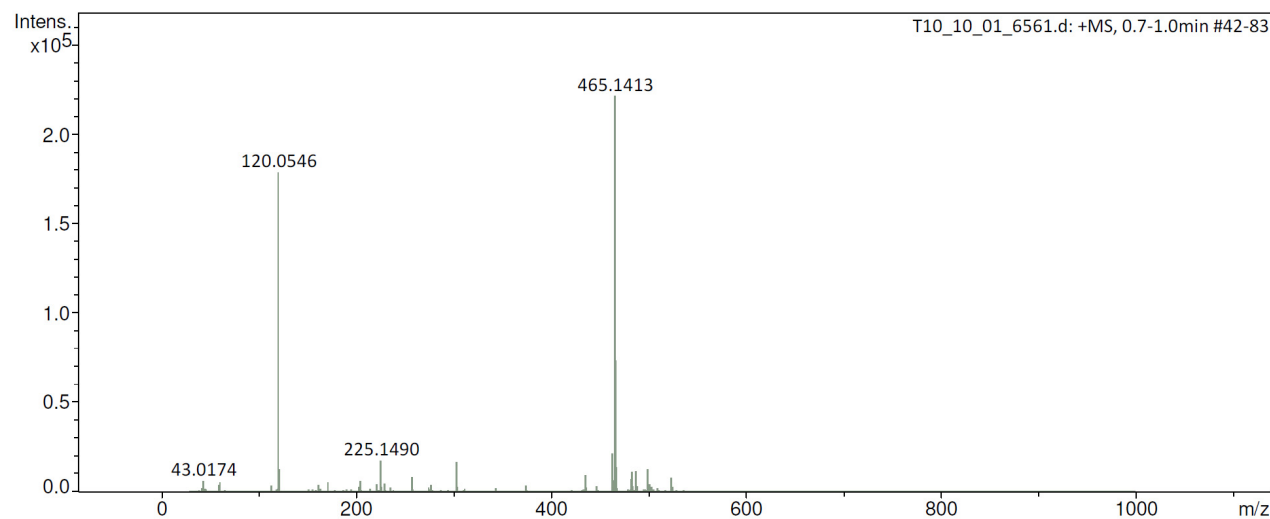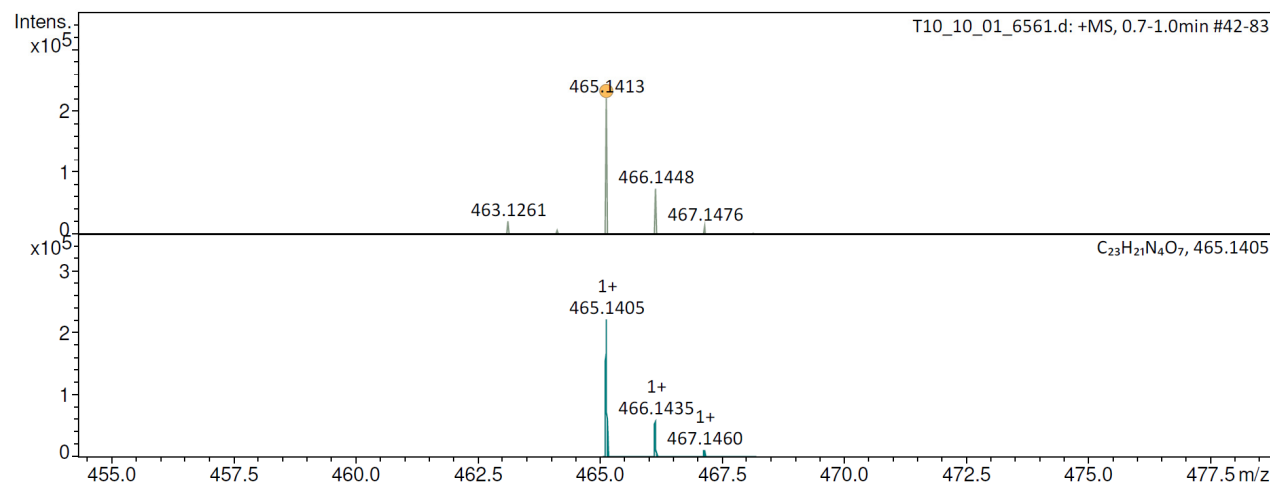

(1-(2-(5-nitro-isatin-1-yl)ethyl)-1,2,3-triazol-4-yl)methyl (E)-3-(3,4-dihydroxyphenyl)acrylate (33)

<sup>1</sup>H NMR (500 MHz)

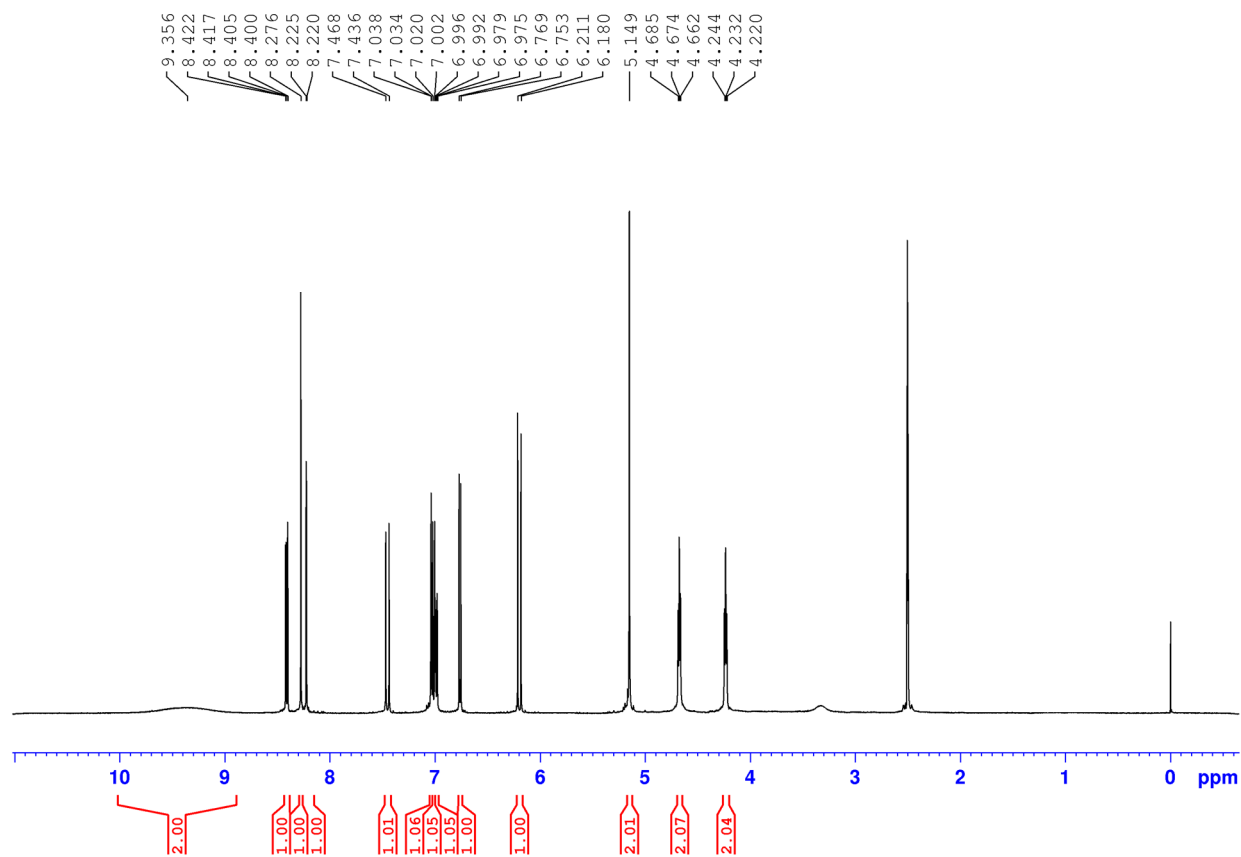

**$^{13}\text{C}$  NMR (125 MHz)**

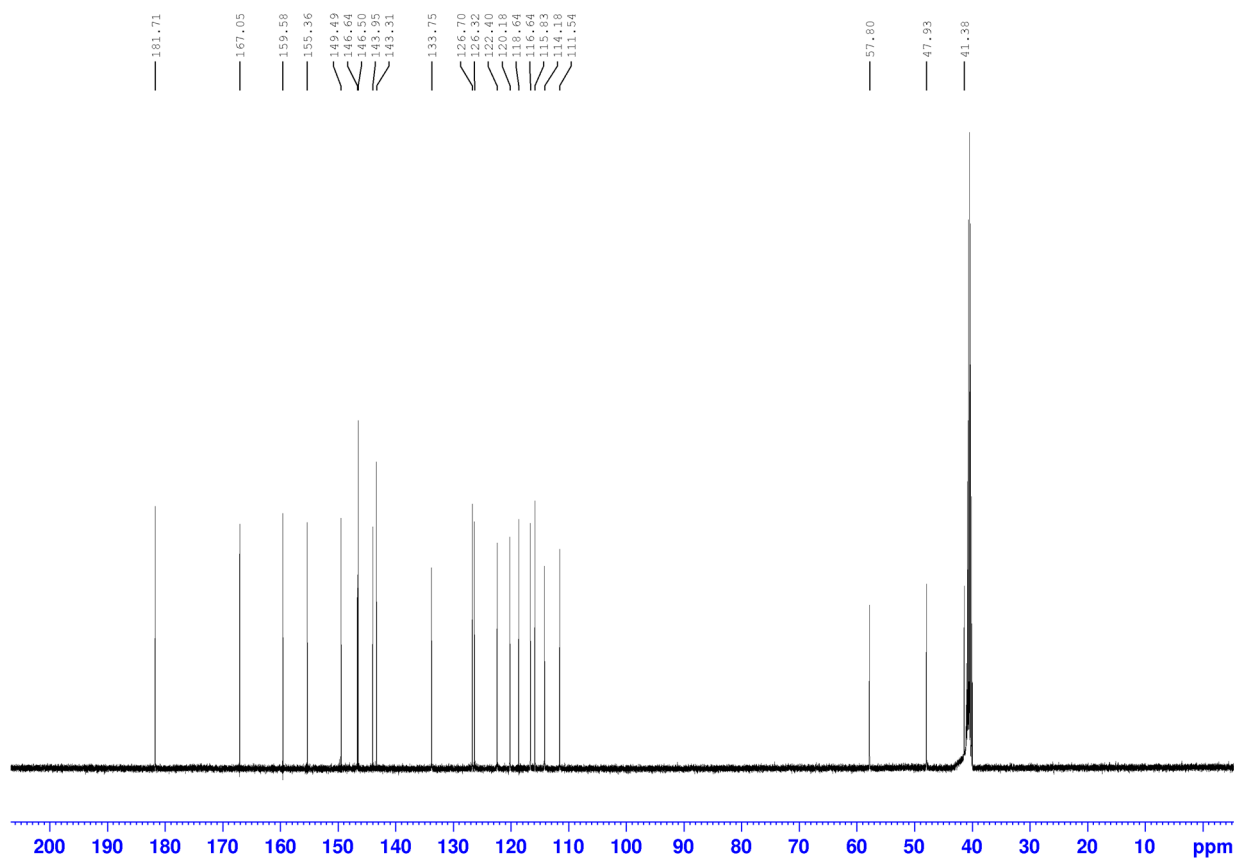

## COSY NMR (500 MHz)

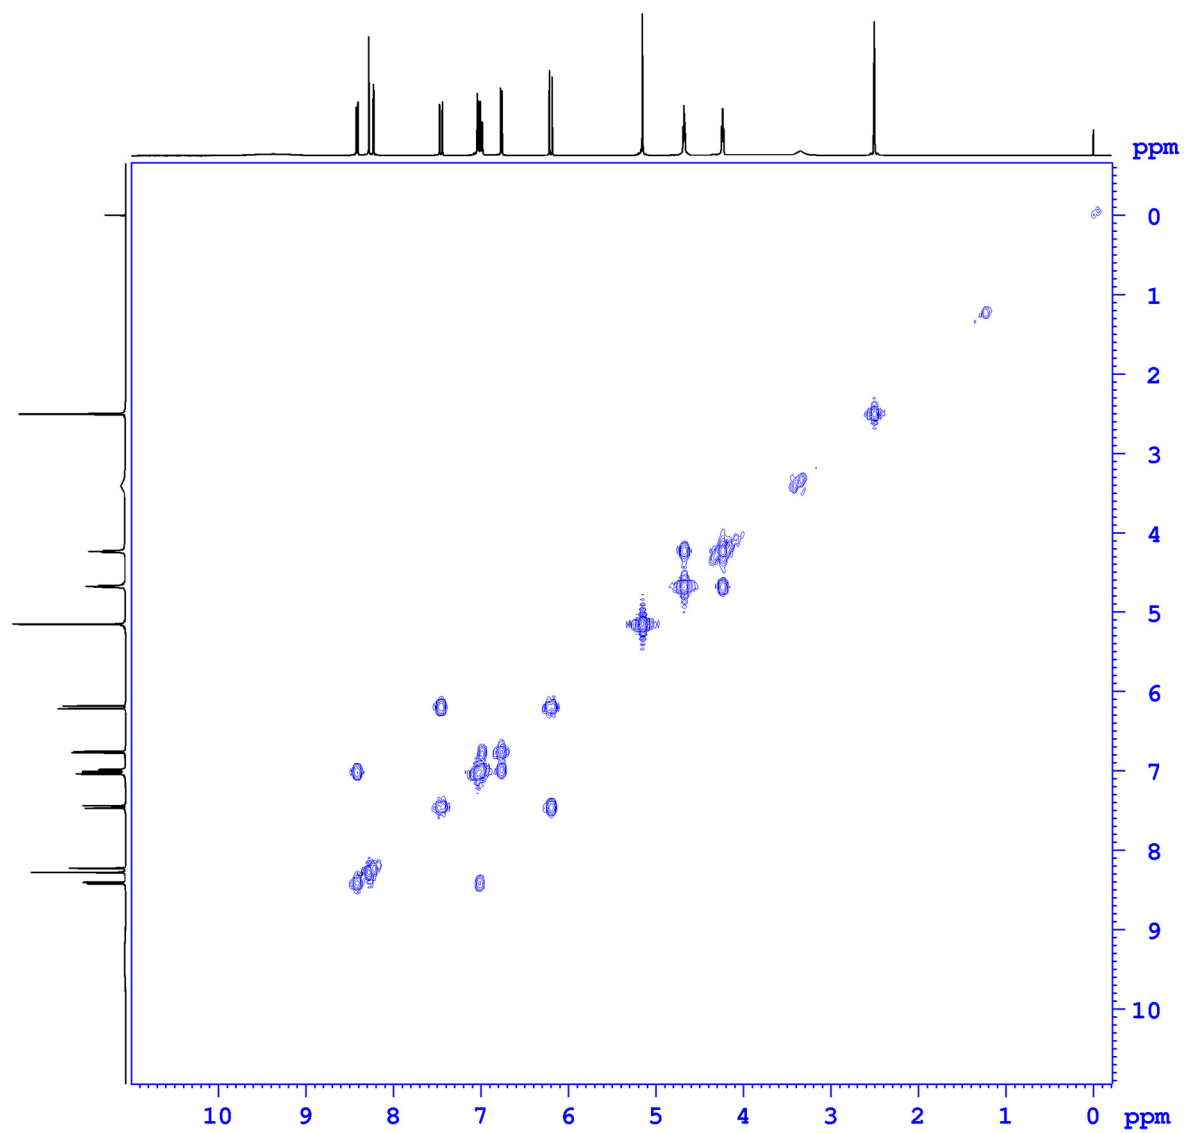



HRMS

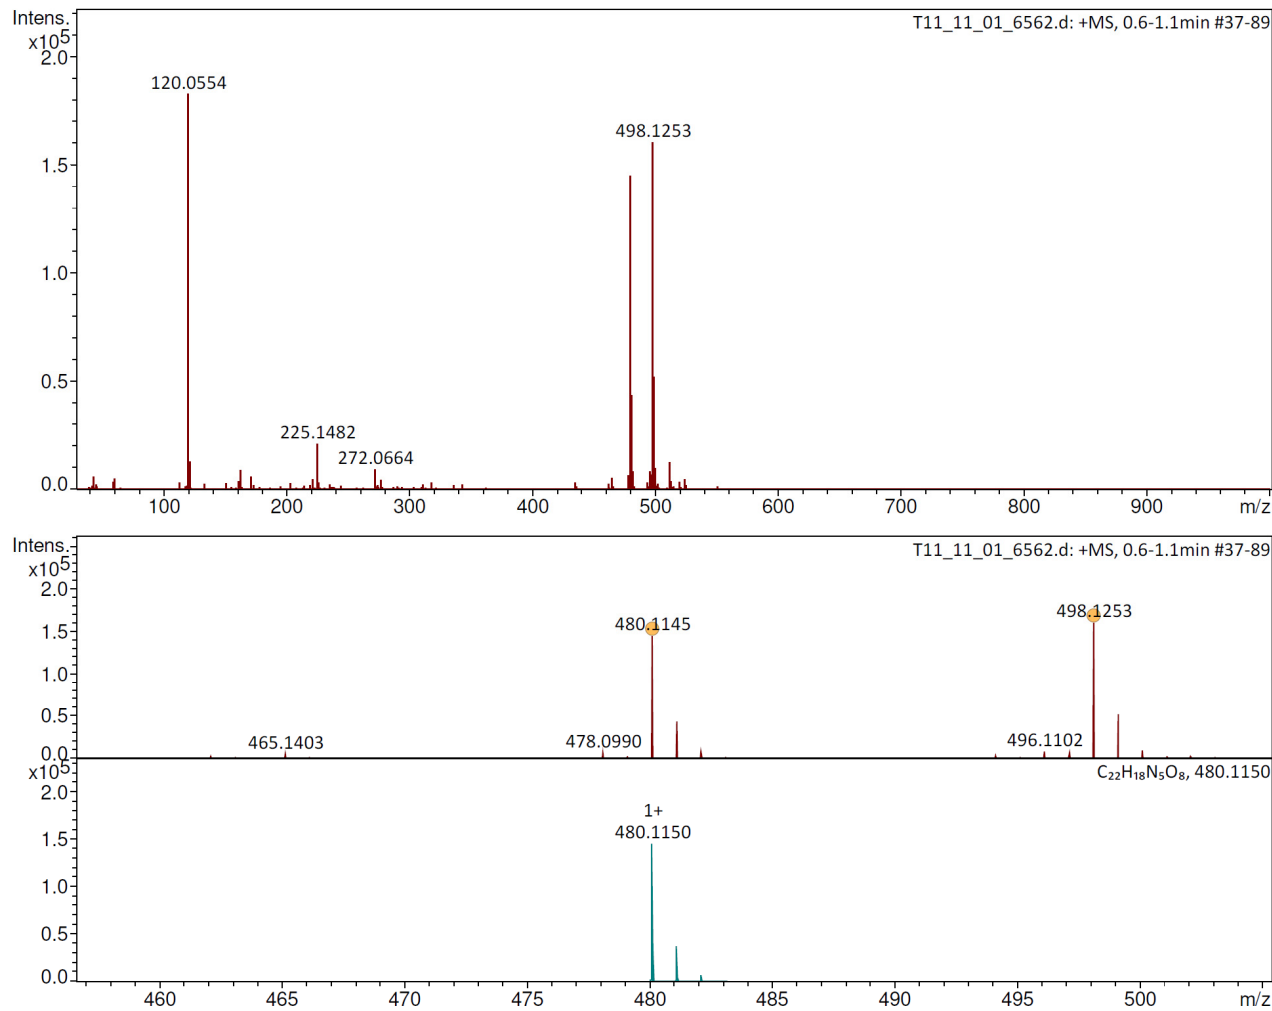

**(1-(2-(5-chloro-isatin-1-yl)ethyl)-1,2,3-triazol-4-yl)methyl (E)-3-(3,4-dihydroxyphenyl)acrylate (34)**

**<sup>1</sup>H NMR (300 MHz)**

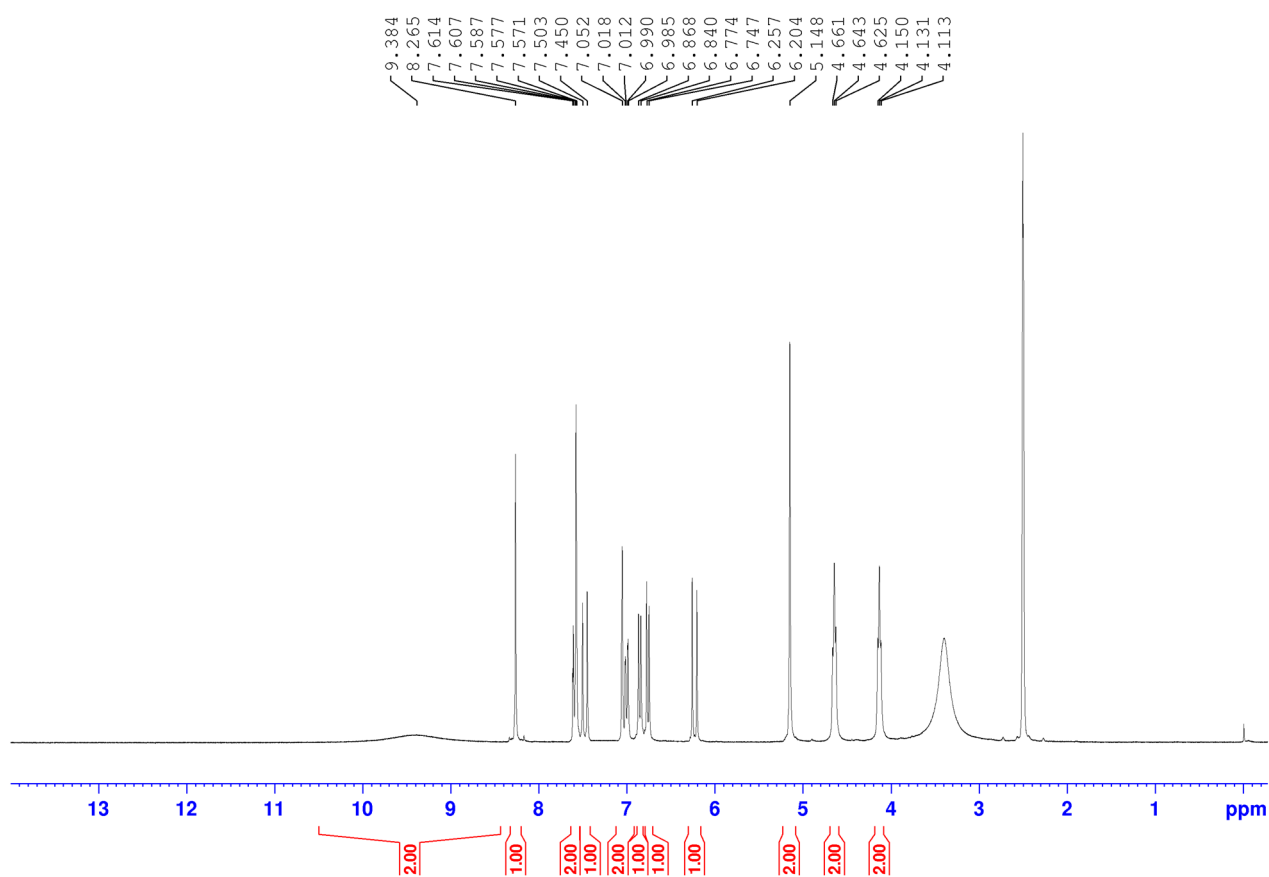

**$^{13}\text{C}$  NMR (125 MHz)**

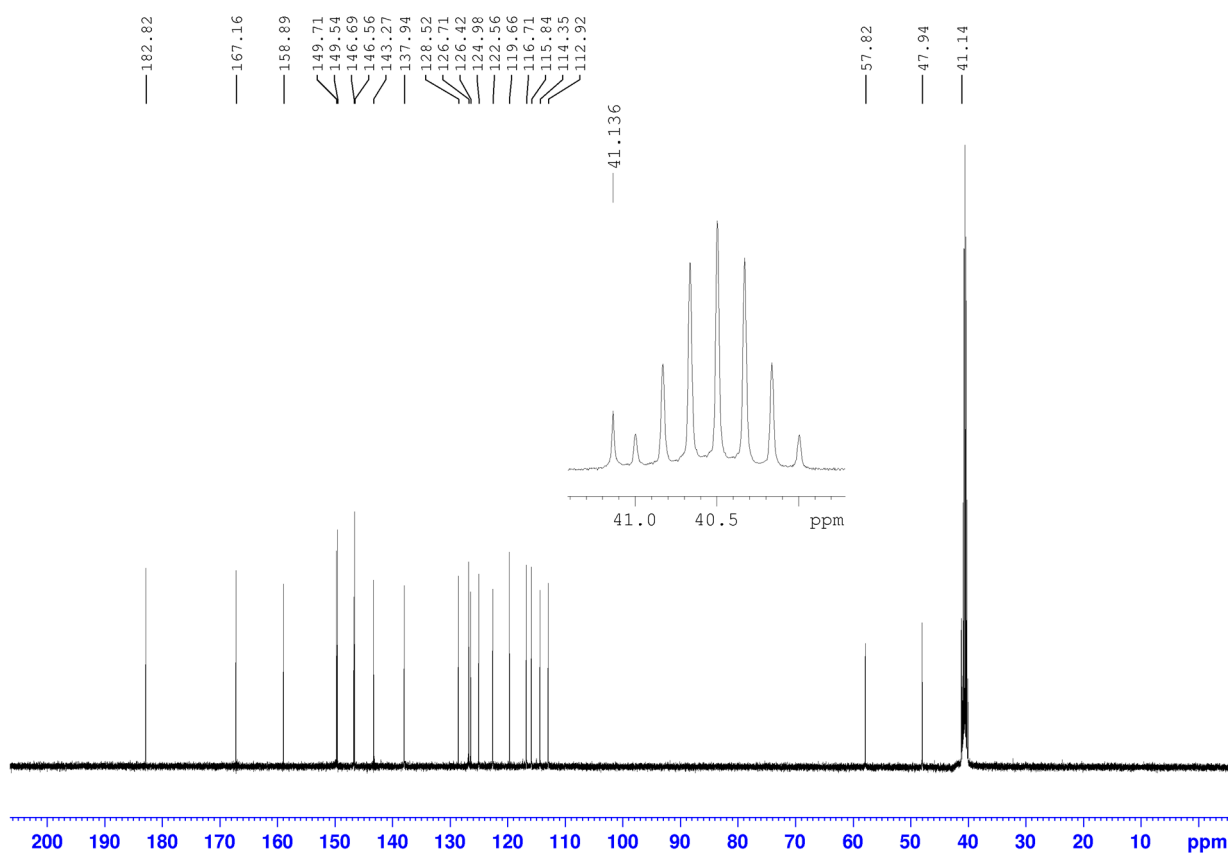

### COSY NMR (300 MHz)

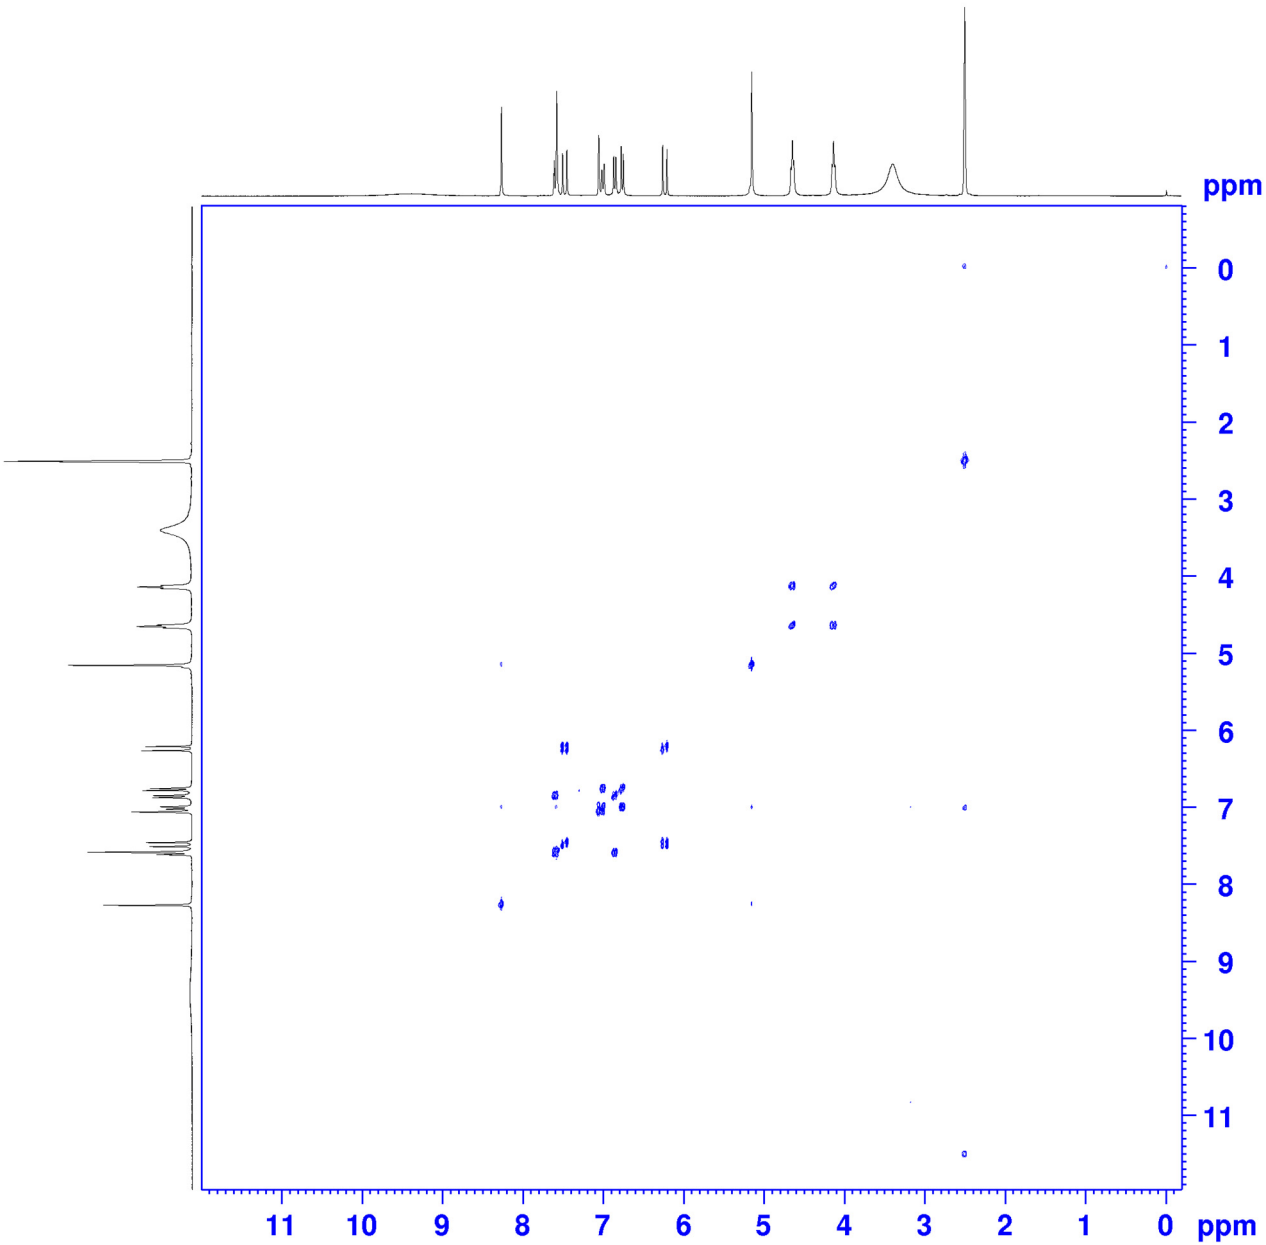

HRMS

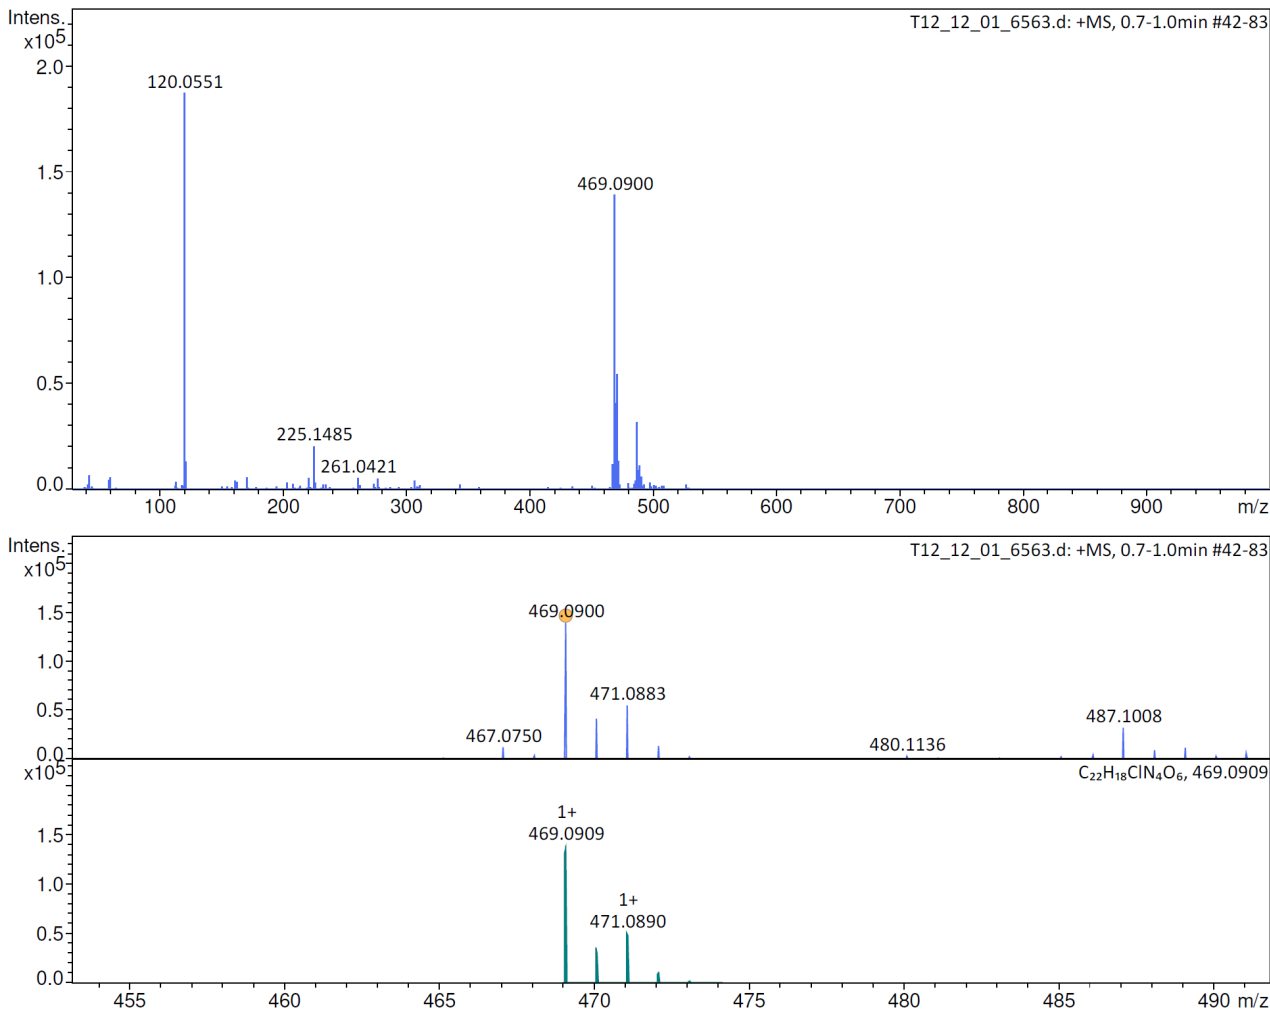

Supplement: s1 [file s1]
